# Supplementary material for: A bicyclization reaction with two molecular allenyl ketones and isocyanides: synthesis of a lactone-containing azaspirocycle derivative
Source: Royal Society of Chemistry journal article supplement (doi:10.1039/c9cc02785h), 2019-01-01

## **Bicyclization reaction with two molecular allenyl ketones and isocyanides: a synthesis of lactone-containing azaspirocycle derivative**

Hongdong Yuan,<sup>a</sup> Chongrong Tang,<sup>a</sup> Shikuan Su,<sup>a</sup> Lei Cui,<sup>a</sup> Xueshun Jia,<sup>\*a,b</sup> Chunju Li,<sup>c</sup> and Jian  
Li<sup>\*a</sup>

<sup>a</sup> Department of Chemistry, Innovative Drug Research Center, College of Sciences & Institute of Sustainable Energy, Shanghai University, 99 Shangda Road, Shanghai 200444, P. R. China

<sup>b</sup> State Key Laboratory of Applied Organic Chemistry, Lanzhou University, Lanzhou 730000, P. R. China

<sup>c</sup> Key Laboratory of Inorganic-Organic Hybrid Functional Material Chemistry, Ministry of Education, Tianjin Key Laboratory of Structure and Performance for Functional Molecules, College of Chemistry, Tianjin Normal University, Tianjin 300387, P. R. China

E-mail: xsjia@mail.shu.edu.cn; lijian@shu.edu.cn

### **Supporting Information**

#### **Table of Contents**

|          |                                                                          |     |
|----------|--------------------------------------------------------------------------|-----|
| <b>1</b> | <b>General Information</b>                                               | S2  |
| <b>2</b> | <b>General Procedure</b>                                                 | S2  |
|          | General Procedure for the Formation of Product 3-4                       | S2  |
| <b>3</b> | <b>Characterization Data</b>                                             | S4  |
|          | Spectroscopic Data of All Compounds                                      | S4  |
| <b>4</b> | <b>Controlled Experiment and Mechanistic Study</b>                       | S17 |
| <b>5</b> | <b><sup>1</sup>H NMR and <sup>13</sup>C NMR Spectra of All Compounds</b> | S21 |

## 1 General Information

The NMR spectra were recorded on Bruker AC-500 spectrometer (500 MHz for  $^1\text{H}$  NMR and 125 MHz for  $^{13}\text{C}$  NMR) with  $\text{CDCl}_3$  as the solvent and TMS as internal reference.  $^1\text{H}$  NMR spectral data were reported as follows: chemical shift ( $\delta$ , ppm), multiplicity, integration, and coupling constant (Hz).  $^{13}\text{C}$  NMR spectral data were reported in terms of the chemical shift. The following abbreviations were used to indicate multiplicities: s = singlet; d = doublet; t = triplet; q = quartet; m = multiplet. Low-resolution mass spectra were obtained on a Shimadzu LCMS-2010EV spectrometer in ESI mode and reported as m/z. High-resolution mass spectra (HRMS) were recorded on a Bruker Daltonics, Inc. APEXIII 7.0 TESLA FTMS instrument. Melting points were obtained on a X-4 digital melting point apparatus without correction. Purification of products was accomplished by column chromatography packed with silica gel. Unless otherwise stated, all reagents were commercially purchased and used without further purification.

## 2 General Procedure

### 2.1 General procedure for the synthesis of product

Under air atmosphere, a sealable reaction tube with a Teflon-coated screw cap equipped with a magnetic stir bar was charged with allenyl ketone **1** (0.5 mmol), isocyanide **2** (1.0 mmol), in toluene (5.0 mL) at room temperature. Then capped it with a septum and stirred at 100 °C for 12 h. After the reaction was completed, it was cooled to room temperature and monitored by TLC. And the reaction mixture was concentrated under vacuum. The residue was purified by flash chromatography on silica gel (eluant: petroleum ether/ethyl acetate = 8:1) to give the desired product **3** or **4**.

## 2.2 Representative procedure for the preparation of substituted Allenyl ketone .

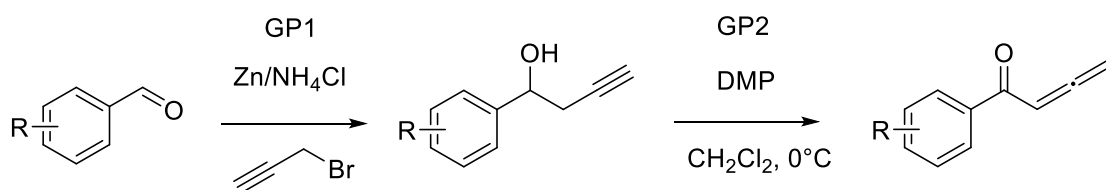

*General Procedure 1:* To a stirred suspension of the corresponding aldehyde (1 equiv.), propargyl bromide (2.0 equiv.; 80% in toluene) and zinc dust (5.0 equiv.) in THF at 0 °C was added to a saturated aqueous NH<sub>4</sub>Cl solution dropwise. The mixture was allowed to warm up to room temperature and was stirred until full conversion was detected by TLC. The mixture was filtered over celite and the filter cake rinsed with CH<sub>2</sub>Cl<sub>2</sub>. The combined filtrates were washed with a saturated aqueous NH<sub>4</sub>Cl solution and distilled water. After drying over MgSO<sub>4</sub>, filtration and evaporation of the solvent in vacuo gave the crude product which was purified by flash column chromatography.

*General Procedure 2.* The Dess-Martin periodinane reagent (1.5 equiv.) as a solid was added to a solution of the corresponding homopropargyl alcohol dissolved in CH<sub>2</sub>Cl<sub>2</sub> at 0°C. The solution was warmed up to room temperature and the reaction monitored by TLC (usually a fast reaction with reaction times < 1 h). Upon full conversion the solvent was partially removed under reduced pressure at low temperature and the crude material directly purified by flash column chromatography.

## 3 Characterization Data

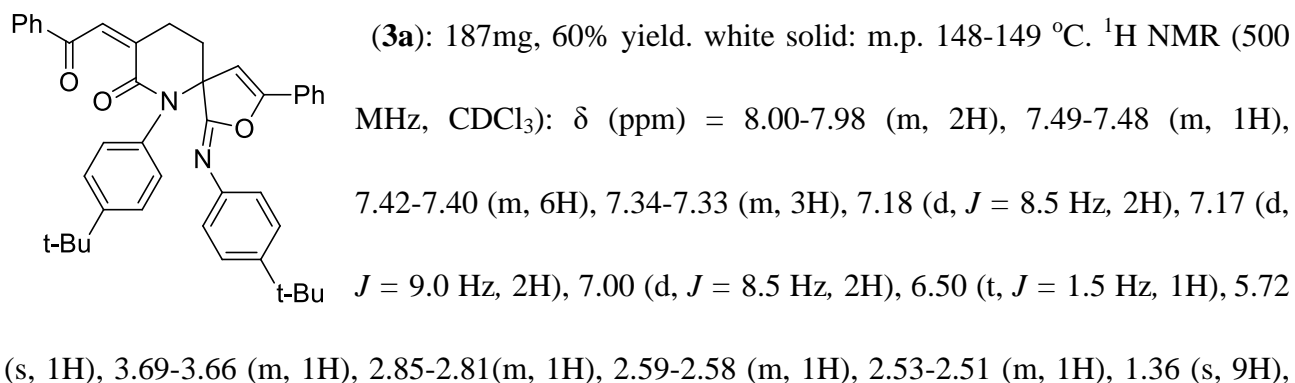

1.14 (s, 9H) .  $^{13}\text{C}$  NMR (125 MHz,  $\text{CDCl}_3$ ):  $\delta$  (ppm) = 195.7, 163.3, 158.2, 153.8, 150.6, 148.4, 141.9, 136.4, 136.3, 135.9, 134.3, 132.9, 130.2, 129.0, 128.7, 128.5, 128.1, 125.9, 125.8, 125.5, 123.3, 103.7, 71.1, 34.6, 34.5, 34.4, 31.6, 31.3, 25.3. HRMS (ESI): calcd for  $\text{C}_{42}\text{H}_{43}\text{N}_2\text{O}_3$   $[\text{M}+\text{H}]^+$  623.3268, Found: 623.3274 .

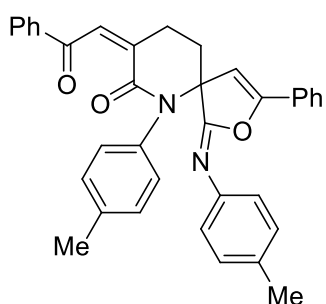

**(3b)**: 153 mg, 57% yield. white solid: m.p. 118-119 °C.  $^1\text{H}$  NMR (500 MHz,  $\text{CDCl}_3$ ):  $\delta$  (ppm) = 8.02-8.00 (m, 2H), 7.44-7.34 (m, 8H), 7.23 (d,  $J = 8.0$  Hz, 2H), 7.18 (d,  $J = 8.0$  Hz, 2H), 6.97 (s, 4H), 6.51 (s, 1H), 5.78 (s, 1H), 3.69-3.64 (m, 1H), 2.86-2.83 (m, 1H), 2.62-2.61 (m, 1H),

2.54-2.52 (m, 1H), 2.40 (s, 3H), 2.17 (s, 3H).  $^{13}\text{C}$  NMR (125 MHz,  $\text{CDCl}_3$ ):  $\delta$  (ppm) = 195.5, 163.1, 158.0, 153.5, 141.9, 137.6, 136.2, 136.1, 135.6, 134.8, 134.1, 132.6, 129.9, 129.4, 129.3, 128.9, 128.8, 128.5, 128.2, 127.8, 125.2, 123.3, 103.3, 70.8, 34.1, 25.2, 21.0, 20.9. HRMS (ESI): calcd for  $\text{C}_{36}\text{H}_{31}\text{N}_2\text{O}_3$   $[\text{M}+\text{H}]^+$  539.2329, Found: 539.2339.

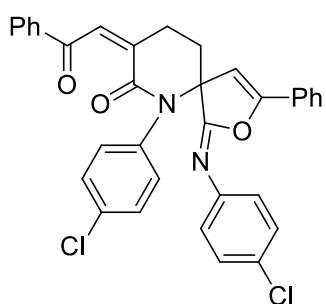

**(3c)**: 147mg, 51% yield. white solid: m.p. 112-113 °C.  $^1\text{H}$  NMR (500 MHz,  $\text{CDCl}_3$ ):  $\delta$  (ppm) = 7.98-7.97 (m, 2H), 7.52-7.49 (m, 1H), 7.43-7.35 (m, 9H), 7.14 (t,  $J = 8.5$  Hz, 4H), 7.01 (d,  $J = 8.5$  Hz, 2H), 6.56 (s, 1H), 5.79 (s, 1H), 3.62-3.57 (m, 1H), 2.88-2.84 (m, 1H), 2.63-2.61 (m, 1H), 2.53-2.51 (m, 1H) .  $^{13}\text{C}$  NMR (125 MHz,  $\text{CDCl}_3$ ):  $\delta$

(ppm) = 195.4, 163.3, 159.1, 154.1, 143.1, 137.4, 136.7, 136.3, 134.1, 133.7, 133.1, 131.0, 130.8, 130.6, 129.3, 129.1, 128.9, 128.6, 127.4, 125.4, 124.7, 103.1, 71.3, 34.3, 25.5. HRMS (ESI): calcd for  $\text{C}_{34}\text{H}_{25}\text{Cl}_2\text{N}_2\text{O}_3$   $[\text{M}+\text{H}]^+$  579.1237, Found: 579.1237 .

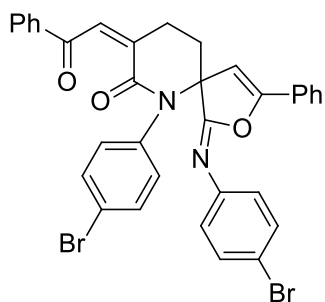

**(3d)**: 130mg, 39% yield. white solid: m.p. 129-130 °C.  $^1\text{H}$  NMR (500 MHz,  $\text{CDCl}_3$ ):  $\delta$  (ppm) = 7.98-7.97 (m, 2H), 7.52-7.49 (m, 3H), 7.43-7.30 (m, 9H), 7.06 (d,  $J$  = 8.5 Hz, 2H), 6.95 (d,  $J$  = 9.0 Hz, 2H), 6.56 (s, 1H), 5.79 (s, 1H), 3.62-3.56 (m, 1H), 2.89-2.84 (m, 1H),

2.65-2.59 (m, 1H), 2.54-2.48 (m, 1H).  $^{13}\text{C}$  NMR (125 MHz,  $\text{CDCl}_3$ ):  $\delta$  (ppm) = 195.4, 163.2, 159.1, 154.1, 143.6, 137.9, 136.7, 136.3, 133.7, 133.1, 132.2, 132.1, 131.3, 130.7, 128.8, 128.6, 127.4, 125.4, 125.0, 122.4, 118.7, 103.1, 71.2, 34.3, 25.4. HRMS (ESI): calcd for  $\text{C}_{34}\text{H}_{25}\text{Br}_2\text{N}_2\text{O}_3$   $[\text{M}+\text{H}]^+$  667.0226, Found: 667.0225.

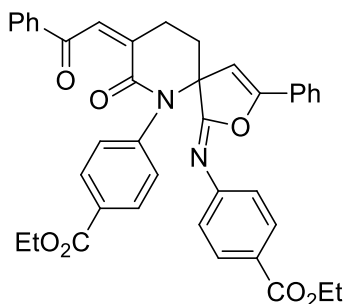

**(3e)**: 193mg, 59% yield. white solid: m.p. 103-104 °C.  $^1\text{H}$  NMR (500 MHz,  $\text{CDCl}_3$ ):  $\delta$  (ppm) = 8.07 (d,  $J$  = 8.5 Hz, 2H), 7.97-7.96 (m, 2H), 7.88 (m,  $J$  = 8.5 Hz, 2H), 7.49-7.48 (m, 1H), 7.42-7.39 (m, 2H), 7.34-7.33 (m, 5H), 7.19-7.17 (m, 2H), 7.15-7.13 (m, 2H), 6.58 (s, 1H),

5.81 (s, 1H), 4.39 (q,  $J$  = 7.0 Hz, 2H), 4.26 (q,  $J$  = 7.0 Hz, 2H), 3.66-3.63 (m, 1H), 2.90-2.86 (m, 1H), 2.64-2.63 (m, 1H), 2.59-2.56 (m, 1H), 1.41(t,  $J$  = 7.0 Hz, 3H), 1.29 (t,  $J$  = 7.0 Hz, 3H).  $^{13}\text{C}$  NMR (125 MHz,  $\text{CDCl}_3$ ):  $\delta$  (ppm) = 195.4, 166.4, 165.9, 163.1, 159.8, 154.1, 149.1, 143.1, 136.9, 136.3, 133.6, 133.1, 130.7, 130.6, 130.4, 130.3, 129.6, 128.9, 128.8, 128.6, 127.3, 127.2, 125.4, 122.5, 103.2, 71.1, 61.2, 61.1, 34.4, 25.3, 14.5, 14.3. HRMS (ESI): calcd for  $\text{C}_{40}\text{H}_{35}\text{N}_2\text{O}_7$   $[\text{M}+\text{H}]^+$  655.2439, Found: 655.2432.

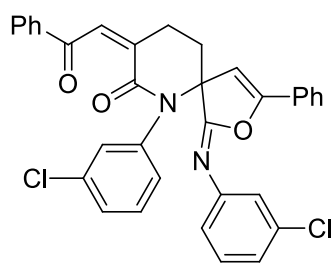

**(3f)**: 153mg, 53% yield. white solid: m.p. 103-104 °C. <sup>1</sup>H NMR (500 MHz, CDCl<sub>3</sub>): δ (ppm) = 7.99-7.97 (m, 2H), 7.51-7.49 (m, 1H), 7.43-7.32 (m, 8H), 7.19-7.12 (m, 5H), 7.06-7.04 (m, 1H), 6.99-6.97 (m, 1H), 6.57 (s, 1H), 5.78 (s, 1H), 3.62-3.59 (m, 1H), 2.88-2.87 (m, 1H), 2.63-2.59 (m, 1H), 2.55-2.50 (m, 1H). <sup>13</sup>C NMR (125 MHz, CDCl<sub>3</sub>): δ (ppm) = 195.5, 163.2, 159.6, 154.2, 145.9, 139.9, 136.9, 136.2, 134.6, 134.4, 133.6, 133.2, 130.7, 130.3, 130.1, 129.9, 128.9, 128.8, 128.7, 128.6, 127.8, 127.4, 125.5, 125.4, 123.2, 121.2, 103.2, 71.2, 34.2, 25.4. HRMS (ESI): calcd for C<sub>34</sub>H<sub>25</sub>Cl<sub>2</sub>N<sub>2</sub>O<sub>3</sub> [M+H]<sup>+</sup> 579.1237, Found: 579.1245.

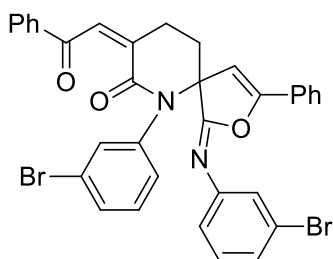

**(3g)**: 110mg, 33% yield. white solid: m.p. 78-79 °C. <sup>1</sup>H NMR (500 MHz, CDCl<sub>3</sub>): δ (ppm) = 7.99-7.97 (m, 2H), 7.53-7.50 (m, 1H), 7.44-7.41 (m, 2H), 7.38-7.24 (m, 10H), 7.09-7.02 (m, 3H), 6.57 (s, 1H), 5.78 (s, 1H), 3.64-3.58 (m, 1H), 2.89-2.83 (m, 1H), 2.64-2.59 (m, 1H), 2.55-2.49 (m, 1H). <sup>13</sup>C NMR (125 MHz, CDCl<sub>3</sub>): δ (ppm) = 195.4, 163.1, 159.7, 154.2, 146.1, 139.9, 136.9, 136.2, 133.6, 133.2, 131.6, 130.7, 130.4, 130.2, 128.9, 128.8, 128.6, 128.3, 127.4, 126.1, 125.5, 122.6, 122.3, 121.6, 103.1, 71.2, 34.2, 25.4. HRMS (ESI): calcd for C<sub>34</sub>H<sub>25</sub>Br<sub>2</sub>N<sub>2</sub>O<sub>3</sub> [M+H]<sup>+</sup> 667.0226, Found: 667.0223

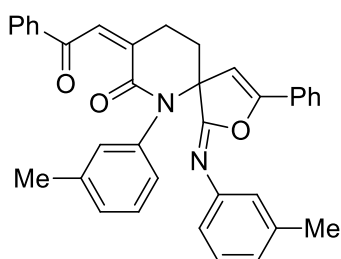

**(3h)**: 140mg, 52% yield. white solid: m.p. 104-105 °C. <sup>1</sup>H NMR (500 MHz, CDCl<sub>3</sub>): δ (ppm) = 8.01-7.99 (m, 2H), 7.51-7.48 (m, 1H), 7.43-7.32 (m, 8H), 7.06-7.05 (m, 1H), 7.02-6.95 (m, 6H), 6.52 (s, 1H), 5.76 (s, 1H), 3.70-3.63 (m, 1H), 2.89-2.83 (m, 1H), 2.66-2.61 (m, 1H), 2.55-2.49 (m, 1H), 2.40 (s, 3H), 2.17 (s, 3H). <sup>13</sup>C NMR (125 MHz, CDCl<sub>3</sub>): δ (ppm) = 195.6, 163.2,

158.6, 153.8, 144.9, 138.7, 138.6, 136.4, 135.9, 134.2, 132.8, 130.4, 130.2, 128.9, 128.7, 128.6, 128.5, 127.8, 126.3, 125.9, 125.4, 123.8, 119.8, 103.5, 70.9, 34.2, 25.4, 21.6, 21.3. HRMS (ESI): calcd for C<sub>36</sub>H<sub>31</sub>N<sub>2</sub>O<sub>3</sub> [M+H]<sup>+</sup> 539.2329, Found: 539.2327.

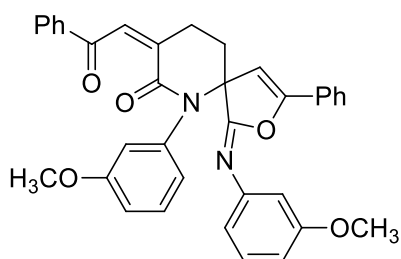

**(3i)**: 131 mg, 46% yield. white solid: m.p. 107-108 °C. <sup>1</sup>H NMR (500 MHz, CDCl<sub>3</sub>): δ (ppm) = 8.01-7.98 (m, 2H), 7.49-7.47 (m, 1H), 7.41-7.39 (m, 4H), 7.34-7.32 (m, 4H), 7.10-7.08 (m, 1H), 6.82-6.79 (m, 1H), 6.77-6.75 (m, 2H), 6.69-6.67(m, 3H),

6.53-6.52 (m, 1H), 5.78 (s, 1H), 3.82 (s, 3H), 3.64-3.62 (m, 1H), 3.55 (s, 3H), 2.88-2.86 (m, 1H), 2.63-2.61 (m, 1H), 2.54-2.52 (m, 1H). <sup>13</sup>C NMR (125 MHz, CDCl<sub>3</sub>): δ (ppm) = 195.4, 162.9, 159.9, 159.7, 158.7, 153.7, 145.8, 139.7, 136.2, 136.0, 133.9, 132.8, 130.1, 129.5, 129.4, 128.8, 128.6, 128.3, 127.6, 125.2, 121.5, 115.3, 114.6, 114.3, 111.1, 108.5, 103.3, 70.9, 55.2, 55.0, 34.1, 25.2. HRMS (ESI): calcd for C<sub>36</sub>H<sub>31</sub>N<sub>2</sub>O<sub>5</sub> [M+H]<sup>+</sup> 571.2227, Found: 571.2227.

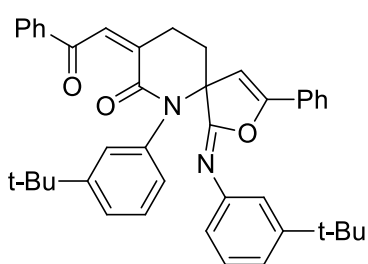

**(3j)**: 156mg, 50% yield. white solid: m.p. 104-105 °C. <sup>1</sup>H NMR (500 MHz, CDCl<sub>3</sub>): δ (ppm) = 8.02-8.00 (m, 2H), 7.49-7.38 (m, 6H), 7.32-7.29 (m, 4H), 7.23-7.21 (m, 2H), 7.12-7.01 (m, 3H), 6.93-6.92(m, 1H), 6.53 (s, 1H), 5.80 (s, 1H), 3.67-3.63 (m, 1H),

2.91-2.87 (m, 1H), 2.69-2.67 (m, 1H), 2.55-2.50 (m, 1H). <sup>13</sup>C NMR (125 MHz, CDCl<sub>3</sub>): δ (ppm) = 195.7, 162.9, 158.4, 153.8, 151.9, 151.7, 144.4, 138.5, 136.4, 135.8, 134.5, 132.9, 130.2, 128.9, 128.7, 128.5, 128.4, 127.9, 127.0, 125.8, 125.2, 125.0, 122.3, 120.9, 120.5, 103.4, 71.2, 34.8, 34.5, 34.2, 31.5, 31.2, 25.7. HRMS (ESI): calcd for C<sub>42</sub>H<sub>43</sub>N<sub>2</sub>O<sub>3</sub> [M+H]<sup>+</sup> 623.3268, Found: 623.3273 .

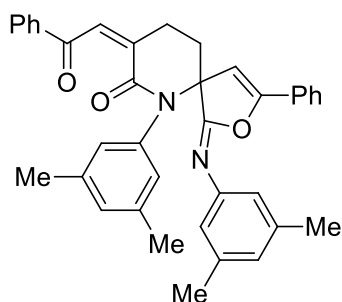

**(3k)**: 139 mg, 49% yield. white solid: m.p. 101-102 °C. <sup>1</sup>H NMR (500 MHz, CDCl<sub>3</sub>): δ (ppm) = 7.99-7.98 (m, 2H), 7.50-7.47 (m, 1H), 7.42-7.32 (m, 7H), 6.83 (s, 1H), 6.77-6.74 (m, 5H), 6.51 (s, 1H), 5.75 (s, 1H), 3.65-3.61 (m, 1H), 2.87-2.85 (m, 1H), 2.62-2.61 (m, 1H), 2.53-2.49 (m, 1H), 2.35 (s, 6H), 2.12 (s, 6H). <sup>13</sup>C NMR (125 MHz,

CDCl<sub>3</sub>): δ (ppm) = 195.5, 162.9, 158.4, 153.6, 144.9, 138.3, 138.1, 136.3, 135.7, 134.1, 132.7, 130.0, 129.8, 128.9, 128.5, 128.3, 127.9, 127.2, 126.5, 125.2, 120.2, 103.4, 70.7, 33.9, 25.4, 21.3, 21.0. HRMS (ESI): calcd for C<sub>38</sub>H<sub>35</sub>N<sub>2</sub>O<sub>3</sub> [M+H]<sup>+</sup> 567.2642, Found: 567.2647.

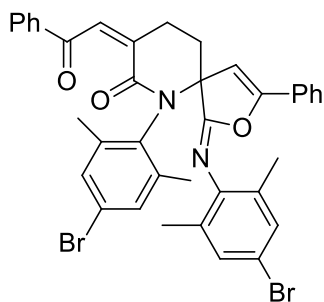

**(3l)**: 134mg, 37% yield. white solid: m.p. 145-146 °C. <sup>1</sup>H NMR (500 MHz, CDCl<sub>3</sub>): δ (ppm) = 7.97 (dd, *J* = 8.0, 1.0 Hz, 2H), 7.52-7.49 (m, 1H), 7.39-7.35 (m, 7H), 7.17 (s, 2H), 7.08 (d, *J* = 2.0 Hz, 1H), 7.02 (d, *J* = 2.0 Hz, 1H), 6.64 (t, *J* = 2.0 Hz, 1H), 5.83 (s, 1H), 3.57-3.53 (m, 1H),

3.10-3.07 (m, 1H), 2.81-2.78 (m, 1H), 2.57-2.55 (m, 1H), 2.18 (s, 3H), 2.12 (s, 3H), 1.89 (s, 6H). <sup>13</sup>C NMR (125 MHz, CDCl<sub>3</sub>): δ (ppm) = 195.1, 162.9, 157.1, 153.7, 142.3, 140.9, 138.3, 137.6, 137.0, 136.4, 133.6, 133.1, 131.6, 130.7, 130.6, 128.9, 128.8, 128.7, 128.5, 127.4, 125.4, 122.1, 116.9, 102.7, 70.4, 36.8, 24.9, 19.9, 19.8, 18.1. HRMS (ESI): calcd for C<sub>38</sub>H<sub>33</sub>Br<sub>2</sub>N<sub>2</sub>O<sub>3</sub>[M+H]<sup>+</sup> 723.0852, Found: 723.0853 .

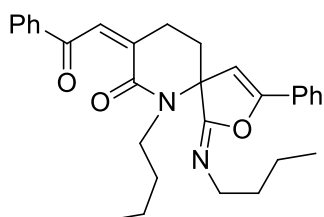

**(3m)**: 106mg, 45% yield. yellow oil. <sup>1</sup>H NMR (500 MHz, CDCl<sub>3</sub>): δ (ppm) = 8.00-7.99 (m, 2H), 7.65-7.63 (m, 2H), 7.53-7.49 (m, 1H), 7.45-7.42 (m, 5H), 6.32 (s, 1H), 5.68 (s, 1H), 3.54 (t, *J* = 7.0 Hz, 2H),



3.37-3.32 (m, 1H), 3.18-3.12 (m, 1H), 3.01-2.95 (m, 1H), 2.63-2.58 (m, 1H), 2.31-2.19 (m, 2H), 1.67-1.61 (m, 2H), 1.46-1.33 (m, 4H), 1.06-1.02 (m, 2H), 0.97 (t,  $J = 7.0$  Hz, 3H), 0.70 (t,  $J = 7.0$  Hz, 3H).  $^{13}\text{C}$  NMR (125 MHz,  $\text{CDCl}_3$ ):  $\delta$  (ppm) = 196.0, 162.9, 158.5, 153.8, 136.7, 134.9, 134.2, 132.8, 130.3, 128.9, 128.5, 128.4, 125.4, 103.2, 68.6, 47.7, 45.5, 34.4, 32.7, 30.6, 25.1, 20.7, 20.4, 14.0, 13.8 . HRMS (ESI):calcd for  $\text{C}_{30}\text{H}_{35}\text{N}_2\text{O}_3$ [ $\text{M}+\text{H}$ ] $^+$ 471.2642, Found: 471.2658 .

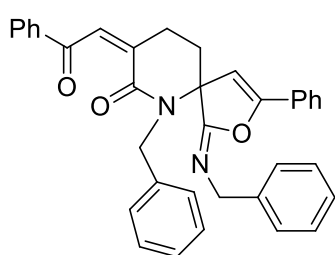

**(3n)**: 137mg, 51% yield. white solid: m.p. 70-71 °C.  $^1\text{H}$  NMR (500 MHz,  $\text{CDCl}_3$ ):  $\delta$  (ppm) = 8.05-8.03 (m, 2H), 7.56-7.53 (m, 1H), 7.51-7.49 (m, 2H), 7.45-7.42 (m, 5H), 7.37-7.36 (m, 4H), 7.29-7.27 (m, 1H), 7.11-7.06 (m, 3H), 6.96-6.94 (m, 2H), 6.44-6.43 (m, 1H), 5.39 (s,

1H), 4.77 (d,  $J = 15.0$  Hz, 1H), 4.68 (d,  $J = 15.0$  Hz, 1H), 4.43 (d,  $J = 15.0$  Hz, 1H), 4.22 (d,  $J = 15.0$  Hz, 1H), 3.67-3.60 (m, 1H), 2.65-2.60 (m, 1H), 2.34-2.22 (m, 2H).  $^{13}\text{C}$  NMR (125 MHz,  $\text{CDCl}_3$ ):  $\delta$  (ppm) = 195.9, 163.6, 159.5, 153.4, 139.8, 138.3, 136.8, 135.1, 134.7, 132.8, 130.3, 128.8, 128.7, 128.5, 128.4, 128.3, 128.1, 128.0, 127.5, 126.9, 126.8, 125.4, 103.9, 68.3, 51.4, 47.8, 34.0, 24.5 . HRMS (ESI): calcd for  $\text{C}_{36}\text{H}_{31}\text{N}_2\text{O}_3$  [ $\text{M}+\text{H}$ ] $^+$  539.2329, Found: 539.2325

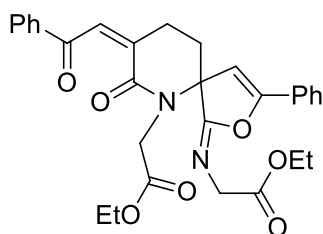

**(3o)**: 114mg, 43% yield. yellow oil .  $^1\text{H}$  NMR (500 MHz,  $\text{CDCl}_3$ ):  $\delta$  (ppm) = 7.98-7.97 (m, 2H), 7.57-7.55 (m, 2H), 7.52-7.50 (m, 1H), 7.45-7.41 (m, 5H), 6.40 (s, 1H), 5.85 (s, 1H), 4.44 (d,  $J = 17.0$  Hz, 1H), 4.36 (s, 2H), 4.22 (q,  $J = 7.0$  Hz, 2H), 3.99 (q,  $J = 7.0$  Hz, 2H), 3.46-3.39 (m, 1H),

3.36 (d,  $J = 17.5$  Hz, 1H), 2.72-2.67 (m, 1H), 2.42-2.35 (m, 2H), 1.29 (t,  $J = 7.5$  Hz, 3H), 1.07 (t,  $J = 7.5$  Hz, 3H).  $^{13}\text{C}$  NMR (125 MHz,  $\text{CDCl}_3$ ):  $\delta$  (ppm) = 195.6, 169.5, 169.0, 163.1, 162.6, 153.9,

136.4, 135.5, 133.6, 132.9, 130.6, 128.9, 128.8, 128.6, 127.8, 125.4, 103.5, 69.3, 61.2, 61.1, 49.9, 46.0, 33.8, 25.0, 14.3, 14.1. HRMS (ESI): calcd for  $C_{30}H_{31}N_2O_7$   $[M+H]^+$  531.2126, Found: 531.2129.

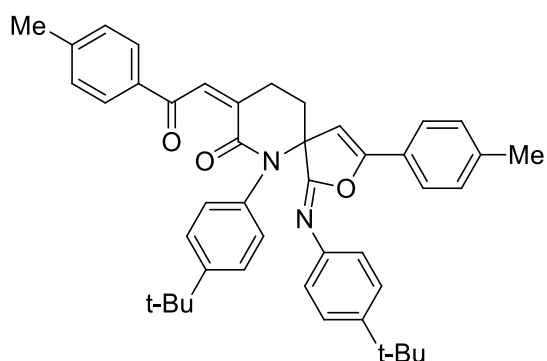

(**4a**): 221mg, 68% yield. white solid: m.p. 116-117 °C.

$^1H$  NMR (500 MHz,  $CDCl_3$ ):  $\delta$  (ppm) = 7.88 (d,  $J$  = 8.5 Hz, 2H), 7.40 (d,  $J$  = 8.5 Hz, 2H), 7.28 (t,  $J$  = 8.5 Hz, 2H), 7.19-7.14 (m, 8H), 7.00 (d,  $J$  = 8.5 Hz, 2H), 6.49-6.48 (m, 1H), 5.66 (s, 1H), 3.66-3.63 (m, 1H),

2.84-2.79 (m, 1H), 2.59-2.57 (m, 1H), 2.52-2.49 (m, 1H), 2.37 (s, 3H), 2.34 (s, 3H), 1.36 (s, 9H),

1.15 (s, 9H).  $^{13}C$  NMR (125 MHz,  $CDCl_3$ ):  $\delta$  (ppm) = 195.2, 163.1, 158.2, 153.7, 150.3, 148.1,

143.4, 141.9, 140.3, 136.3, 135.9, 133.9, 133.8, 129.2, 129.1, 128.9, 128.6, 125.7, 125.6, 125.3,

125.2, 123.2, 102.7, 70.9, 34.5, 34.4, 34.3, 31.4, 31.1, 25.3, 21.7, 21.4. HRMS (ESI): calcd

for  $C_{44}H_{47}N_2O_3$   $[M+H]^+$  651.3581, Found: 651.3588.

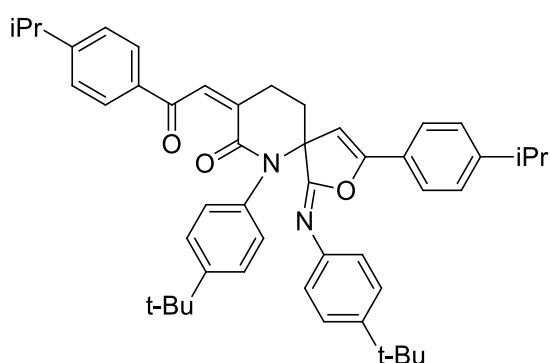

(**4b**): 230mg, 65% yield. white solid: m.p. 152-153 °C.  $^1H$

NMR (500 MHz,  $CDCl_3$ ):  $\delta$  (ppm) = 7.93 (d,  $J$  = 8.5 Hz,

2H), 7.41 (d,  $J$  = 8.5 Hz, 2H), 7.34 (d,  $J$  = 8.5 Hz, 2H),

7.26 (d,  $J$  = 8.5 Hz, 2H), 7.21-7.17 (m, 6H), 7.01 (d,  $J$  =

8.5 Hz, 1H), 6.49 (s, 1H), 5.69 (s, 1H), 3.70-3.64 (m,

1H), 2.96-2.79 (m, 3H), 2.61-2.57 (m, 1H), 2.52-2.47 (m, 1H), 1.37 (s, 9H), 1.24 (t,  $J$  = 7.5 Hz,

12H), 1.16 (s, 9H).  $^{13}C$  NMR (125 MHz,  $CDCl_3$ ):  $\delta$  (ppm) = 195.4, 163.3, 158.4, 154.3, 153.9,

151.4, 150.5, 148.2, 142.1, 136.5, 136.2, 134.3, 134.0, 129.3, 128.7, 126.8, 126.6, 125.9, 125.8,

125.6, 123.3, 103.0, 71.1, 34.6, 34.5, 34.4, 34.2, 31.6, 31.3, 25.4, 23.9, 23.8. HRMS (ESI): calcd for  $C_{48}H_{55}N_2O_3$   $[M+H]^+$  707.4207, Found: 707.4202.

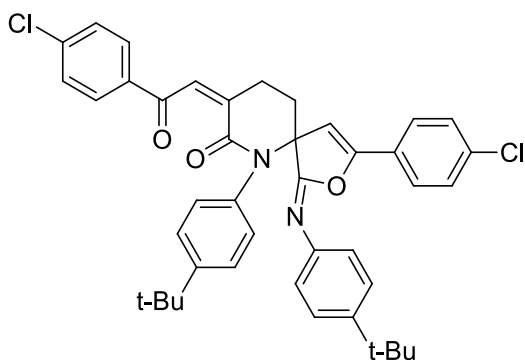

(**4c**): 166mg, 48% yield. white solid: m.p. 120-121 °C.

$^1H$  NMR (500 MHz,  $CDCl_3$ ):  $\delta$  (ppm) = 7.92 (d,  $J$  = 9.0 Hz, 2H), 7.43 (d,  $J$  = 8.5 Hz, 2H), 7.37 (d,  $J$  = 8.5 Hz, 2H), 7.33-7.29 (m, 4H), 7.19-7.17 (m, 4H), 6.97 (d,  $J$  = 9.0 Hz, 2H), 6.46-6.45 (m, 1H), 5.69 (s, 1H), 3.73-3.66

(m, 1H), 2.85-2.79 (m, 1H), 2.61-2.56 (m, 1H), 2.53-2.48 (m, 1H), 1.37 (s, 9H), 1.15 (s, 9H).  $^{13}C$  NMR (125 MHz,  $CDCl_3$ ):  $\delta$  (ppm) = 194.4, 163.2, 157.8, 152.8, 150.8, 148.6, 141.8, 139.2, 136.2, 135.4, 134.9, 134.6, 130.3, 129.0, 128.8, 128.5, 126.8, 126.5, 126.0, 125.9, 123.2, 104.1, 71.0, 34.7, 34.6, 34.1, 31.5, 31.3, 25.1. HRMS (ESI): calcd for  $C_{42}H_{41}Cl_2N_2O_3$   $[M+H]^+$  691.2489, Found: 691.2493.

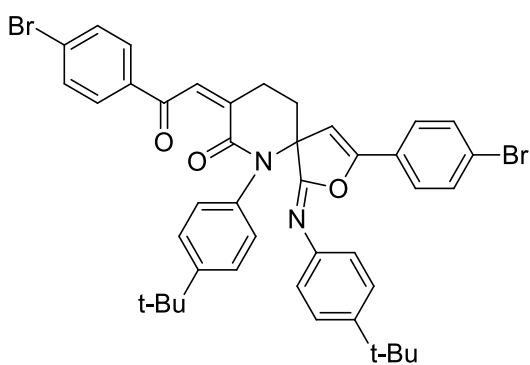

(**4d**): 215mg, 55% yield. white solid: m.p. 124-125 °C.

$^1H$  NMR (500 MHz,  $CDCl_3$ ):  $\delta$  (ppm) = 7.85 (d,  $J$  = 8.5 Hz, 2H), 7.53 (d,  $J$  = 8.5 Hz, 2H), 7.47-7.42 (m, 4H), 7.25-7.23 (m, 2H), 7.19-7.16 (m, 4H), 6.97 (d,  $J$  = 8.5 Hz, 2H), 6.45 (s, 1H), 5.71 (s, 1H), 3.72-3.66 (m, 1H),

2.85-2.79 (m, 1H), 2.60-2.55 (m, 1H), 2.53-2.47 (m, 1H), 1.37 (s, 9H), 1.15 (s, 9H).  $^{13}C$  NMR (125 MHz,  $CDCl_3$ ):  $\delta$  (ppm) = 194.6, 163.2, 157.8, 152.9, 150.8, 148.6, 141.7, 136.2, 135.4, 135.3, 134.6,

131.9, 131.8, 130.5, 128.5, 127.9, 126.9, 126.8, 126.1, 125.9, 124.5, 123.2, 104.2, 71.0, 34.7, 34.6, 34.1, 31.5, 31.3, 25.1. HRMS (ESI): calcd for C<sub>42</sub>H<sub>41</sub>Br<sub>2</sub>N<sub>2</sub>O<sub>3</sub> [M+H]<sup>+</sup> 781.1458, Found: 781.1457.

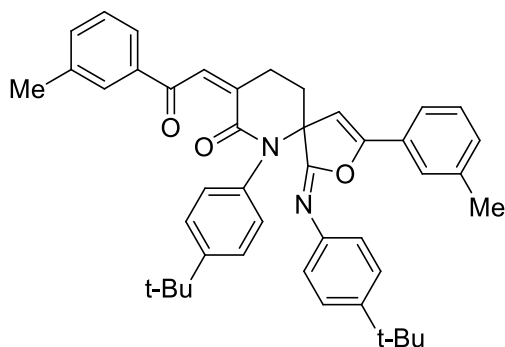

(**4e**): 182mg, 56% yield. white solid: m.p. 123-124 °C. <sup>1</sup>H

NMR (500 MHz, CDCl<sub>3</sub>): δ (ppm) = 7.84-7.80 (m, 2H),

7.43 (d, *J* = 8.5 Hz, 2H), 7.31 (d, *J* = 4.5 Hz, 2H),

7.22-7.18 (m, 8H), 7.02 (d, *J* = 8.5 Hz, 2H), 6.51 (s, 1H),

5.73 (s, 1H), 3.70-3.65 (m, 1H), 2.85-2.81 (m, 1H),

2.62-2.58 (m, 1H), 2.54-2.48 (m, 1H), 2.38 (s, 3H), 2.34 (s, 3H), 1.38 (s, 9H), 1.17 (s, 9H). <sup>13</sup>C

NMR (125 MHz, CDCl<sub>3</sub>): δ (ppm) = 195.8, 163.3, 158.2, 153.9, 150.5, 148.3, 141.9, 138.4, 138.2,

136.4, 136.3, 136.1, 134.2, 133.8, 130.9, 129.3, 128.7, 128.5, 128.3, 128.0, 126.4, 125.9, 125.8,

123.3, 122.7, 103.6, 71.4, 34.6, 34.5, 34.4, 31.5, 31.3, 25.3, 21.5, 21.4. HRMS (ESI): calcd

for C<sub>44</sub>H<sub>47</sub>N<sub>2</sub>O<sub>3</sub> [M+H]<sup>+</sup> 651.3581, Found: 651.3578.

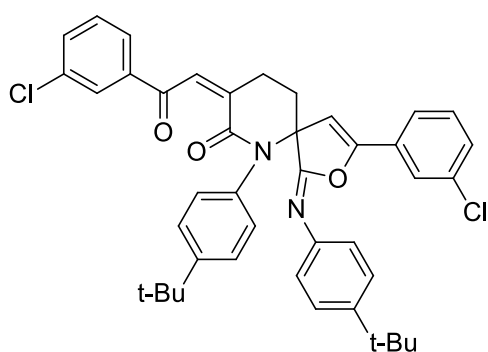

(**4f**): 197mg, 57% yield. white solid: m.p. 115-116 °C. <sup>1</sup>H NMR

(500 MHz, CDCl<sub>3</sub>): δ (ppm) = 7.96-7.95 (m, 1H), 7.88-7.86

(m, 1H), 7.47-7.42 (m, 3H), 7.36-7.31 (m, 3H), 7.27-7.26 (m,

2H), 7.21-7.19 (m, 4H), 6.99-6.98 (m, 2H), 6.47-6.46 (m,

1H), 5.75 (s, 1H, ), 3.74-3.67 (m, 1H), 2.86-2.81 (m, 1H),

2.61-2.60 (m, 1H), 2.49-2.48 (m, 1H), 1.37 (s, 9H), 1.16 (s, 9H). <sup>13</sup>C NMR (125 MHz, CDCl<sub>3</sub>): δ

(ppm) = 194.2, 163.2, 157.5, 152.6, 150.9, 148.6, 141.6, 138.0, 136.2, 135.2, 134.9, 134.8, 134.7,

132.8, 130.3, 130.0, 129.9, 129.8, 129.7, 128.9, 128.5, 127.0, 126.1, 125.9, 125.5, 123.6, 123.4,

104.9, 70.9, 34.7, 34.6, 34.1, 31.5, 31.3, 25.1. HRMS (ESI): calcd for C<sub>42</sub>H<sub>41</sub>Cl<sub>2</sub>N<sub>2</sub>O<sub>3</sub> [M+H]<sup>+</sup> 691.2489, Found: 691.2499.

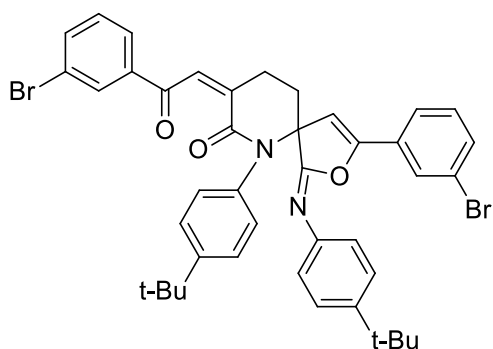

(**4g**): 176mg, 45% yield. white solid: m.p. 126-127 °C. <sup>1</sup>H

NMR (500 MHz, CDCl<sub>3</sub>): δ (ppm) = 8.10-8.09 (m, 1H),

7.92-7.90 (m, 1H), 7.62-7.59 (m, 1H), 7.51-7.50 (m, 1H),

7.48-7.46 (m, 1H), 7.43-7.41 (m, 2H), 7.32-7.27 (m,

2H), 7.22-7.19 (m, 5H), 6.99-6.98 (m, 2H), 6.46-6.45 (m,

1H), 5.74 (s, 1H), 3.73-3.67 (m, 1H), 2.85-2.80 (m, 1H), 2.61-2.59 (m, 1H), 2.53-2.48 (m, 1H), 1.36

(s, 9H), 1.16 (s, 9H). <sup>13</sup>C NMR (125 MHz, CDCl<sub>3</sub>): δ (ppm) = 194.1, 163.2, 157.4, 152.5, 150.9,

148.6, 141.6, 138.2, 136.2, 135.7, 135.2, 134.9, 133.2, 131.8, 130.3, 130.2, 130.0, 128.5, 128.4,

127.5, 126.1, 125.9, 124.1, 123.4, 122.8, 104.9, 70.9, 34.7, 34.6, 34.2, 31.5, 31.3, 25.1. HRMS

(ESI): calcd for C<sub>42</sub>H<sub>41</sub>Br<sub>2</sub>N<sub>2</sub>O<sub>3</sub> [M+H]<sup>+</sup> 781.1458, Found: 781.1450.

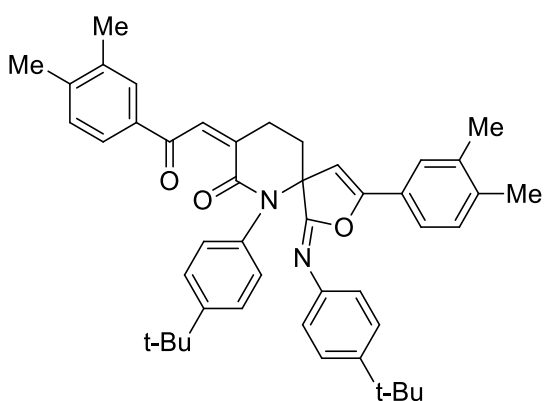

(**4h**): 176mg, 52% yield. white solid: m.p. 122-123 °C.

<sup>1</sup>H NMR (500 MHz, CDCl<sub>3</sub>): δ (ppm) = 7.77 (d, *J* = 1.5

Hz, 1H), 7.73-7.71 (m, 1H), 7.41-7.40 (m, 2H),

7.19-7.08 (m, 8H), 7.01-6.99 (m, 2H), 6.49 (s, 1H),

5.67 (s, 1H), 3.65-3.62 (m, 1H), 2.84-2.79 (m, 1H),

2.61-2.57 (m, 1H), 2.51-2.48 (m, 1H), 2.27-2.24 (m,

12H), 1.36 (s, 9H), 1.15 (s, 9H). <sup>13</sup>C NMR (125 MHz, CDCl<sub>3</sub>): δ (ppm) = 195.7, 163.3, 158.5, 154.0,

150.4, 148.2, 142.4, 142.1, 139.2, 136.9, 136.8, 136.5, 136.2, 134.3, 133.9, 129.9, 129.8, 129.7,

128.8, 126.9, 126.5, 125.9, 125.8, 125.7, 123.4, 123.1, 102.8, 71.1, 34.6, 34.5, 31.6, 31.3, 25.5, 20.2, 19.9, 19.8. HRMS (ESI): calcd for  $C_{46}H_{51}N_2O_3$   $[M+H]^+$  679.3894, Found: 679.3891 .

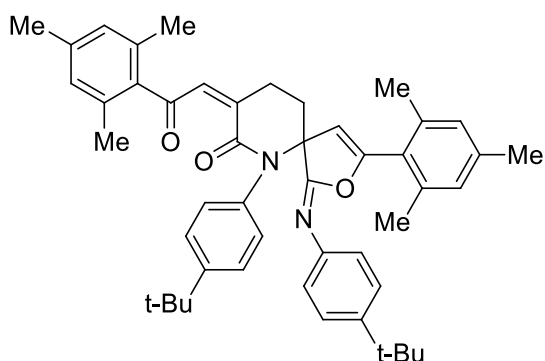

**(4i)**: 187mg, 53% yield. white solid: m.p. 124-125 °C.

$^1H$  NMR (500 MHz,  $CDCl_3$ ):  $\delta$  (ppm) = 7.35-7.33 (m, 2H), 7.29 (d,  $J$  = 10.0 Hz, 2H), 7.19-7.18 (m, 2H), 7.04 (d,  $J$  = 8.0 Hz, 2H), 6.83 (s, 2H), 6.78(s, 2H), 6.42 (d,  $J$  = 2.0 Hz, 1H), 5.24(s, 1H), 3.91-3.83 (m, 1H),

2.59-2.53 (m, 3H), 2.42 (s, 6H), 2.28 (s, 3H), 2.23 (s, 3H), 1.82 (s, 6H), 1.32 (s, 9H), 1.28 (s, 9H) .

$^{13}C$  NMR (125 MHz,  $CDCl_3$ ):  $\delta$  (ppm) = 199.1, 163.4, 159.4, 152.7, 150.7, 148.2, 142.0, 139.7, 139.3, 137.7, 137.2, 137.2, 136.8, 136.6, 136.2, 129.4, 129.2, 128.5, 128.3, 126.3, 125.7, 125.6, 123.5, 122.7, 110.3, 70.7, 35.5, 34.6, 34.5, 31.5, 31.4, 26.8, 21.2, 21.1, 19.7. HRMS (ESI): calcd for  $C_{48}H_{55}Br_2N_2O_3$   $[M+H]^+$  707.4207, Found: 707.4217.

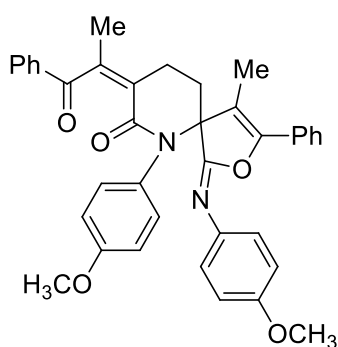

**(4j)**: 188mg, 63% yield. white solid: m.p. 119-120 °C.  $^1H$  NMR (500 MHz,  $CDCl_3$ ):  $\delta$  (ppm) = 7.98 (d,  $J$  = 5.5 Hz, 2H), 7.43-7.37 (m, 10H), 6.98 (s, 4H), 6.67 (d,  $J$  = 8.5 Hz, 2H), 3.86 (s, 3H), 3.64 (s, 4H), 2.85 (s, 1H), 2.57 (s, 1H), 2.37 (s, 1H), 2.06-1.86 (m, 6H).  $^{13}C$  NMR (125 MHz,  $CDCl_3$ ):  $\delta$  (ppm) = 199.4, 165.1, 158.5, 157.3, 147.9, 146.1, 137.9,

135.2, 132.4, 132.2, 129.3, 129.1, 128.8, 128.5, 128.4, 127.0, 125.6, 114.1, 113.9, 112.0, 72.0, 55.5, 55.2, 30.9, 20.4, 17.9, 9.9. HRMS (ESI): calcd for  $C_{38}H_{35}N_2O_5$   $[M+H]^+$  599.2540, Found: 599.2548.

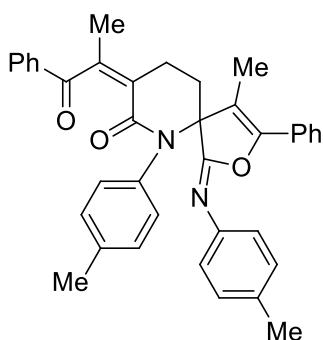

**(4k)**: 187mg, 66% yield. white solid: m.p. 118-119 °C. <sup>1</sup>H NMR (500 MHz, CDCl<sub>3</sub>): δ (ppm) = 7.97 (d, *J* = 5.0 Hz, 2H), 7.45-7.30 (m, 12H), 6.95 (s, 4H), 3.69-6.63 (m, 1H), 2.86-2.83 (m, 1H), 2.59 (s, 1H), 2.41-2.36 (m, 4H), 2.18 (s, 3H), 2.06-1.85 (m, 6H). <sup>13</sup>C NMR (125 MHz, CDCl<sub>3</sub>): δ (ppm) = 199.4, 164.9, 159.1, 147.8, 146.2, 142.4, 137.3,

136.8, 135.2, 134.8, 132.4, 129.5, 129.4, 129.2, 129.1, 128.8, 128.5, 128.4, 127.8, 127.0, 126.3, 123.7, 112.2, 71.8, 30.9, 21.1, 21.0, 20.4, 17.9, 9.9 . HRMS (ESI): calcd for C<sub>38</sub>H<sub>35</sub>N<sub>2</sub>O<sub>3</sub> [M+H]<sup>+</sup> 567.2642, Found: 567.2640

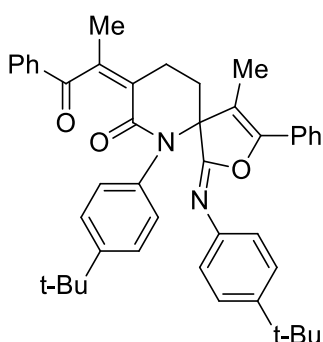

**(4l)**: 185mg, 57% yield. white solid: m.p. 123-124 °C. <sup>1</sup>H NMR (500 MHz, CDCl<sub>3</sub>): δ (ppm) = 7.99 (d, *J* = 7.5 Hz, 2H), 7.47-7.28 (m, 12H), 7.18 (d, *J* = 8.5 Hz, 2H), 7.01 (s, 2H, ), 3.71-3.65 (m, 1H), 2.85 (d, *J* = 12.5 Hz, 1H), 2.61 (s, 1H ), 2.38 (s, 1H), 2.06 (s, 3H), 1.81 (s, 3H), 1.39 (s, 9H), 1.19 (s, 9H). <sup>13</sup>C NMR (125 MHz, DMSO): δ (ppm) = 197.7, 159.3,

149.8, 147.1, 142.1, 132.3, 129.4, 128.6, 128.5, 128.4, 127.8, 126.7, 125.6, 125.1, 122.7, 112.4, 56.0, 54.9, 34.1, 31.2, 31.0, 30.9, 19.8, 17.5, 9.3. HRMS (ESI): calcd for C<sub>44</sub>H<sub>47</sub>N<sub>2</sub>O<sub>3</sub> [M+H]<sup>+</sup> 651.3581, Found: 651.3585.

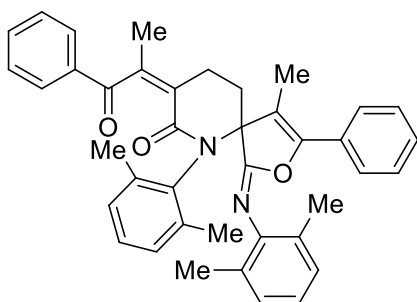

**(4m)**: 146mg, 49% yield. white solid: m.p. 150-151 °C . <sup>1</sup>H NMR (500 MHz, CDCl<sub>3</sub>): δ (ppm) = 8.00 (d, *J* = 6.0 Hz, 2H), 7.52-7.33 (m, 8H), 7.14-6.93 (m, 6H), 3.67 (s, 1H), 3.03 (d, *J* = 16.0 Hz, 1H), 2.87-2.81 (m, 1H), 2.66 (s, 1H), 2.25-2.09 (m,

15H), 1.75 (s, 3H).  $^{13}\text{C}$  NMR (125 MHz,  $\text{CDCl}_3$ ):  $\delta$  (ppm) = 198.9, 163.9, 148.4, 147.8, 143.7, 138.9, 136.6, 132.3, 129.5, 128.7, 128.6, 128.5, 128.4, 127.9, 127.7, 127.4, 125.3, 123.7, 112.3, 70.4, 34.2, 21.3, 19.8, 18.6, 18.0, 10.4. HRMS (ESI): calcd for  $\text{C}_{40}\text{H}_{39}\text{N}_2\text{O}_3$   $[\text{M}+\text{H}]^+$  595.2955, Found: 595.2943.

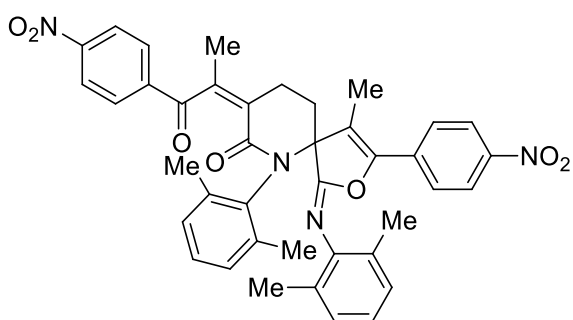

(**4n**): 219mg, 64% yield. white solid: m.p. 133-134 °C.

$^1\text{H}$  NMR (500 MHz,  $\text{CDCl}_3$ ):  $\delta$  (ppm) = 8.22-8.17 (m, 4H), 8.07 (d,  $J$  = 10.0 Hz, 2H), 7.44 (d,  $J$  = 10.0 Hz, 2H), 7.12 (d,  $J$  = 10.0 Hz, 2H), 7.03-7.00 (m, 3H), 6.91 (d,  $J$  = 5.0 Hz, 1H), 3.69 (s, 1H), 3.04 (d,  $J$  = 20.0

Hz, 1H), 2.89-2.83 (m, 1H), 2.63-2.59 (m, 1H), 2.16-2.09 (m, 15H), 1.69 (s, 3H).  $^{13}\text{C}$  NMR (125 MHz,  $\text{CDCl}_3$ ):  $\delta$  (ppm) = 196.4, 164.2, 157.0, 149.8, 147.8, 147.0, 146.6, 143.2, 140.3, 138.5, 137.4, 136.3, 134.5, 129.2, 128.9, 128.8, 128.3, 128.2, 128.1, 126.4, 124.2, 123.8, 123.7, 116.0, 70.4, 33.7, 20.9, 19.8, 19.6, 18.7, 17.7, 10.6. HRMS (ESI): calcd for  $\text{C}_{40}\text{H}_{37}\text{N}_4\text{O}_7$   $[\text{M}+\text{H}]^+$  685.2657, Found: 685.2655

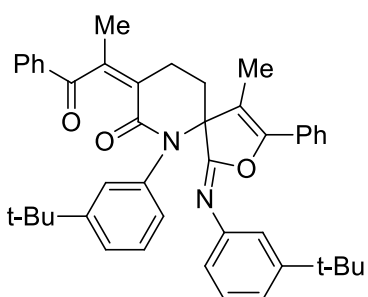

(**4o**): 176mg, 54% yield. yellow oil .  $^1\text{H}$  NMR (500 MHz,  $\text{CDCl}_3$ ):  $\delta$  (ppm) = 7.99 (d,  $J$  = 7.0 Hz, 2H), 7.40-7.29 (m, 11H), 7.18 (d,  $J$  = 7.0 Hz, 1H), 7.13-7.05 (m, 3H), 6.95 (s, 1H), 3.74-3.68 (m, 1H), 2.87 (d,  $J$  = 12.5 Hz, 1H), 2.61 (s, 1H), 2.42 (s, 1H), 2.07 (s, 3H),

1.85 (s, 3H), 1.39 (s, 9H), 1.04 (s, 9H).  $^{13}\text{C}$  NMR (125 MHz, DMSO):  $\delta$  (ppm) = 198.2, 159.9, 151.9, 151.4, 147.1, 145.0, 132.8, 129.8, 129.1, 128.9, 128.4, 126.8, 126.5, 124.6, 122.4, 120.8,



120.4, 113.0, 56.5, 55.4, 34.9, 34.6, 31.6, 31.3, 20.4, 17.9, 9.9 . HRMS (ESI): calcd for C<sub>44</sub>H<sub>47</sub>N<sub>2</sub>O<sub>3</sub> [M+H]<sup>+</sup> 651.3581, Found: 651.3590.

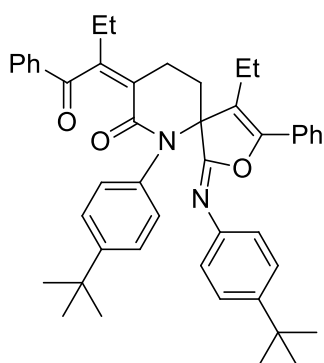

**(4p)**: 159mg, 47% yield. white solid: m.p. 119-120 °C. <sup>1</sup>H NMR (500 MHz, CDCl<sub>3</sub>): δ (ppm) = 7.99 (d, *J* = 10.0 Hz, 2H), 7.47-7.31 (m, 10H), 7.24-7.14 (m, 4H), 6.98-6.97 (m, 2H), 3.81-3.74 (m, 1H), 2.85-2.82 (m, 1H), 2.58-2.18 (m, 6H), 1.38 (s, 9H), 1.16-1.10 (m, 12H), 0.91 (s, 3H) . <sup>13</sup>C NMR (125 MHz, CDCl<sub>3</sub>): δ (ppm) = 198.8, 165.1, 159.3, 151.1,

150.2, 148.6, 148.2, 142.4, 136.9, 136.1, 132.3, 129.5, 129.3, 128.9, 128.5, 128.4, 128.1, 127.4, 127.2, 126.5, 126.4, 126.1, 125.9, 125.7, 123.6, 118.3, 72.4, 34.6, 34.5, 31.6, 31.3, 31.2, 24.8, 19.8, 17.3, 13.5, 11.7. HRMS (ESI): calcd for C<sub>46</sub>H<sub>51</sub>N<sub>2</sub>O<sub>3</sub> [M+H]<sup>+</sup> 679.3894, Found: 679.3890.

## 4 Control Experiment and Mechanistic Study

### 1) Experiment with $\gamma$ -substituted allenyl ketone

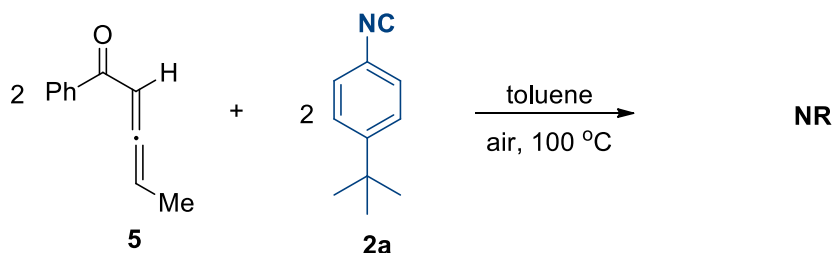

Under air atmosphere, a sealable reaction tube with a Teflon-coated screw cap equipped with a magnetic stir bar was charged with  $\gamma$ -substituted allenyl ketone **5** (0.5 mmol), isocyanide **2a** (1.0 mmol), in toluene (5.0 mL) at room temperature. Then capped it with a septum and stirred at 100 °C for 12 h. After the reaction was completed, it was cooled to room temperature and monitored by

TLC. And the reaction mixture was concentrated under vacuum. No formation of desired product was observed.

## 2) Experiment under nitrogen atmosphere

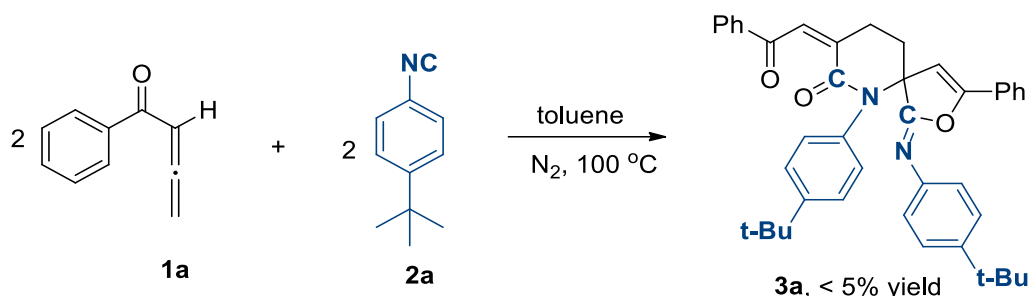

Under nitrogen atmosphere, a screw cap vial was charged with allenyl ketone **1a** (0.5 mmol), isocyanide **2a** (1.0 mmol) in toluene (5.0 mL) at room temperature. Then the vial was purged with nitrogen atmosphere and this mixture was stirred at  $100\text{ }^\circ\text{C}$  for 12 h. After the reaction was completed, it was cooled to room temperature and monitored by TLC. And the reaction mixture was concentrated under vacuum. The residue was purified by flash chromatography on silica gel (eluant: petroleum ether/ethyl acetate = 8:1) to give product **3a**.

## 3) Isotope experiment with $^{18}\text{O}_2$ atmosphere

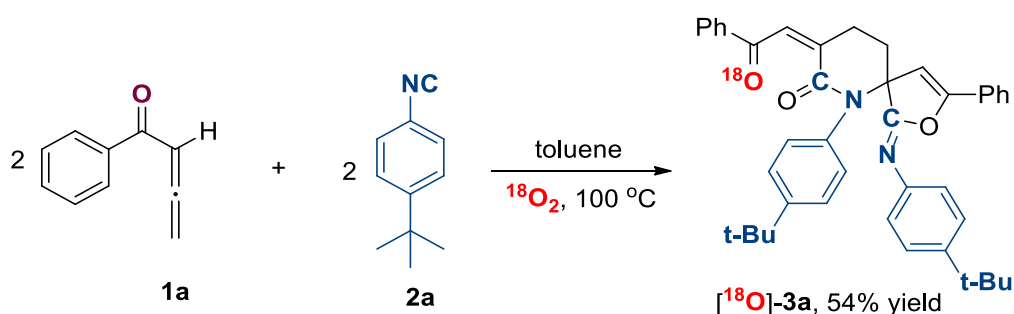

A screw cap vial was charged with allenyl ketone **1a** (0.5 mmol), isocyanide **2a** (1.0 mmol) in toluene (5.0 mL) at room temperature. Then the vial was purged with  $^{18}\text{O}_2$  atmosphere and this mixture was stirred at  $100\text{ }^\circ\text{C}$  for 12 h. After the reaction was completed, it was cooled to room temperature and monitored by TLC. And the reaction mixture was concentrated under vacuum. The

residue was purified by flash chromatography on silica gel (eluant: petroleum ether/ethyl acetate = 8:1) to give product [ $^{18}\text{O}$ ]-**3a**.

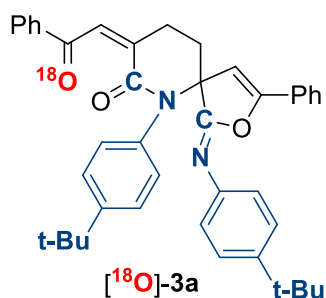

Chemical Formula:  $\text{C}_{42}\text{H}_{43}\text{N}_2\text{O}_2^{18}\text{O}$

Calcd: 625.3311

Found: 625.3327

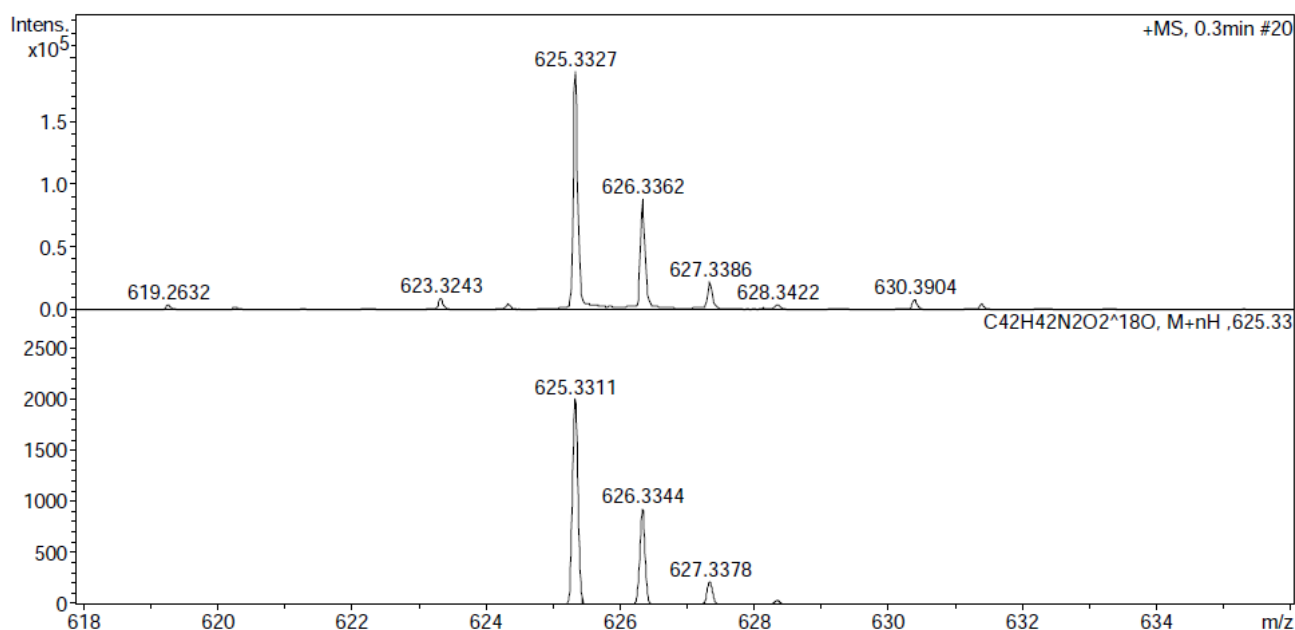

#### 4) Isotope experiment with $^{18}\text{O}_2$ atmosphere

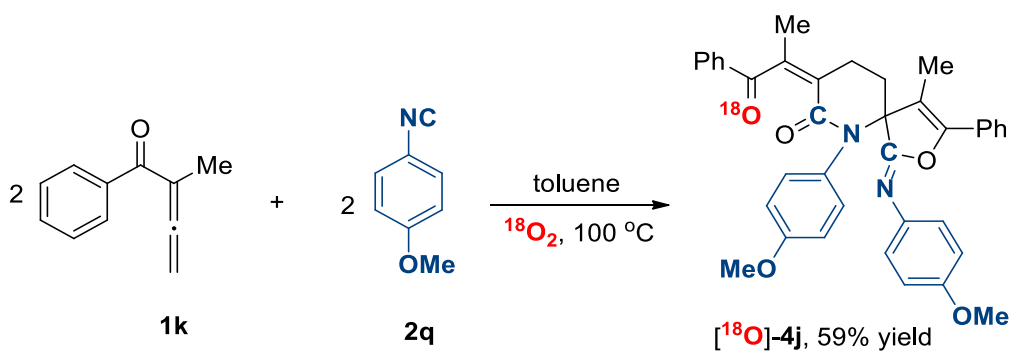

A screw cap vial was charged with allenyl ketone **1k** (0.5 mmol), isocyanide **2q** (1.0 mmol) in toluene (5.0 mL) at room temperature. Then the vial was purged with  $^{18}\text{O}_2$  atmosphere and this

mixture was stirred at 100 °C for 12 h. After the reaction was completed, it was cooled to room temperature and monitored by TLC. And the reaction mixture was concentrated under vacuum. The residue was purified by flash chromatography on silica gel (eluant: petroleum ether/ethyl acetate = 8:1) to give product [<sup>18</sup>O]-4j.

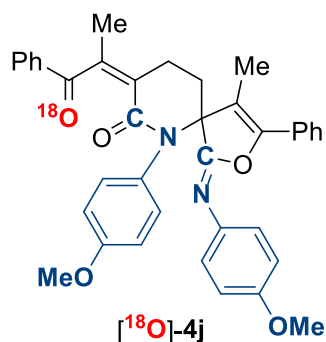

Chemical Formula: C<sub>38</sub>H<sub>35</sub>N<sub>2</sub>O<sub>4</sub><sup>18</sup>O  
 Calcd: 601.2583  
 Found: 601.2593

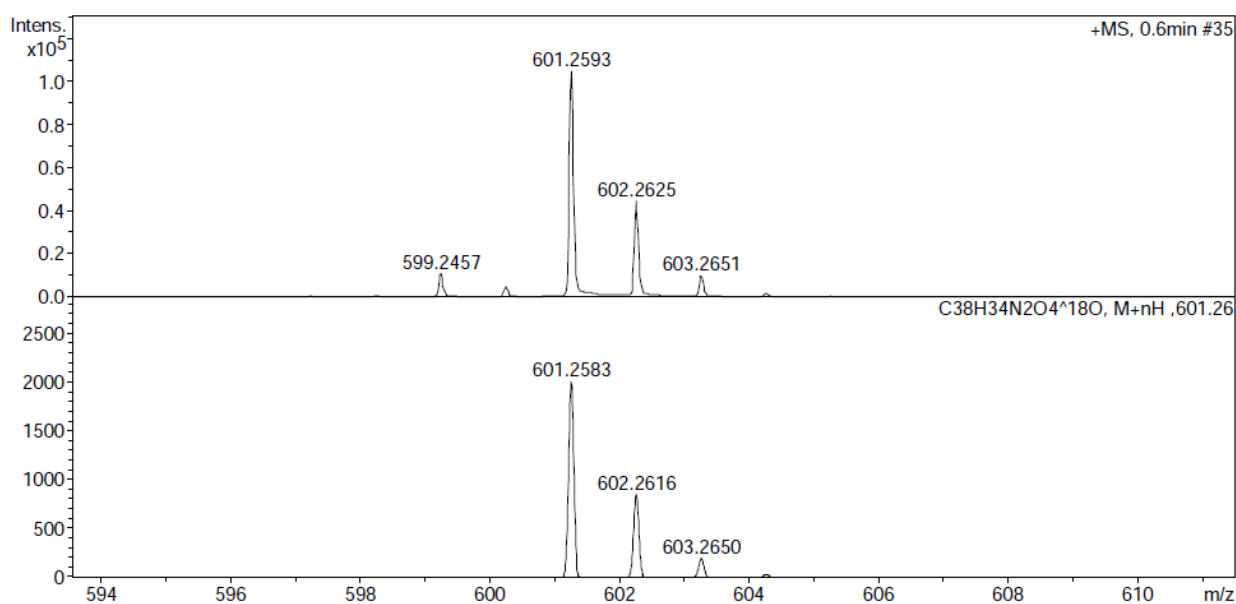

### 5) Isotope experiment with H<sub>2</sub>O<sup>18</sup> atmosphere

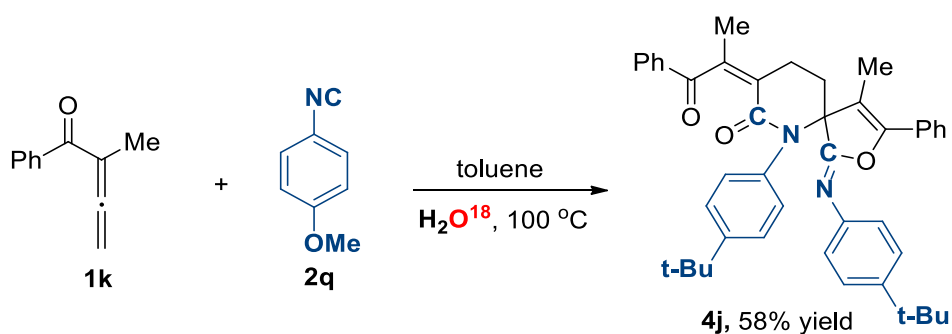

Under air atmosphere, a screw cap vial was charged with allenyl ketone **1k** (0.5 mmol), isocyanide **2q** (1.0 mmol), H<sub>2</sub>O<sup>18</sup> (6 equiv.) in toluene (5.0 mL) at room temperature. Then capped it with a septum and stirred at 100 °C for 12 h. After the reaction was completed, it was cooled to room temperature and monitored by TLC. And the reaction mixture was concentrated under vacuum. The residue was purified by flash chromatography on silica gel (eluant: petroleum ether/ethyl acetate = 8:1) to give product **4j**.

### 6) Isotope experiment with D<sub>2</sub>O atmosphere

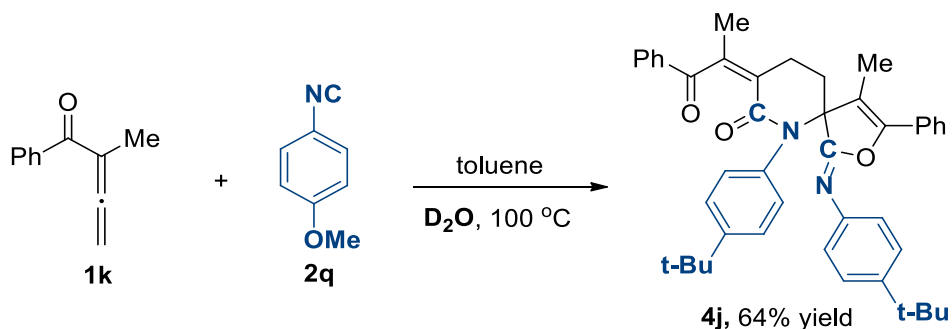

Under air atmosphere, a screw cap vial was charged with allenyl ketone **1k** (0.5 mmol), isocyanide **2q** (1.0 mmol), D<sub>2</sub>O (6 equiv.) in toluene (5.0 mL) at room temperature. Then capped it with a septum and stirred at 100 °C for 12 h. After the reaction was completed, it was cooled to room temperature and monitored by TLC. And the reaction mixture was concentrated under vacuum. The residue was purified by flash chromatography on silica gel (eluant: petroleum ether/ethyl acetate = 8:1) to give product **4j**.

## 5 $^1\text{H}$ MR and $^{13}\text{C}$ NMR Spectra of All Compounds

### Compound 3a

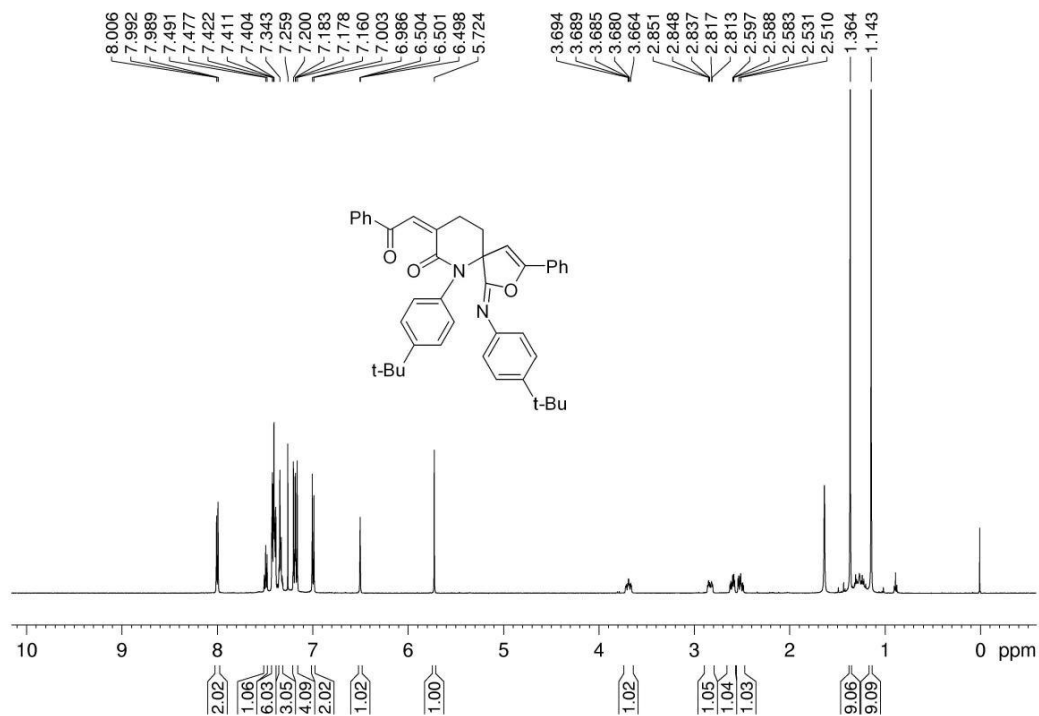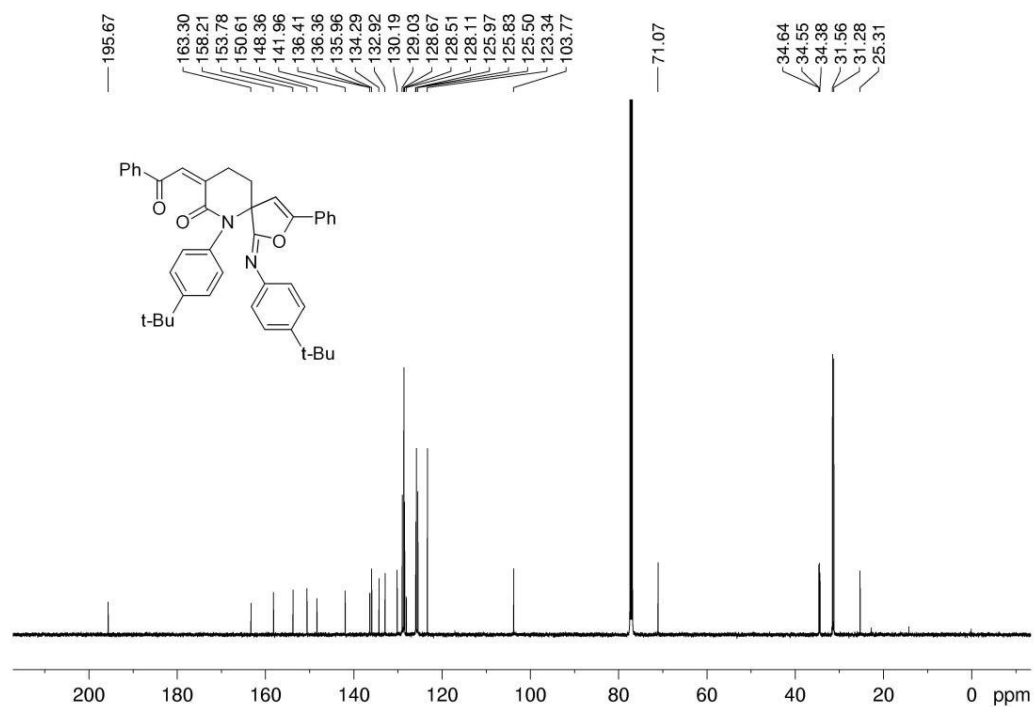

# Compound 3b

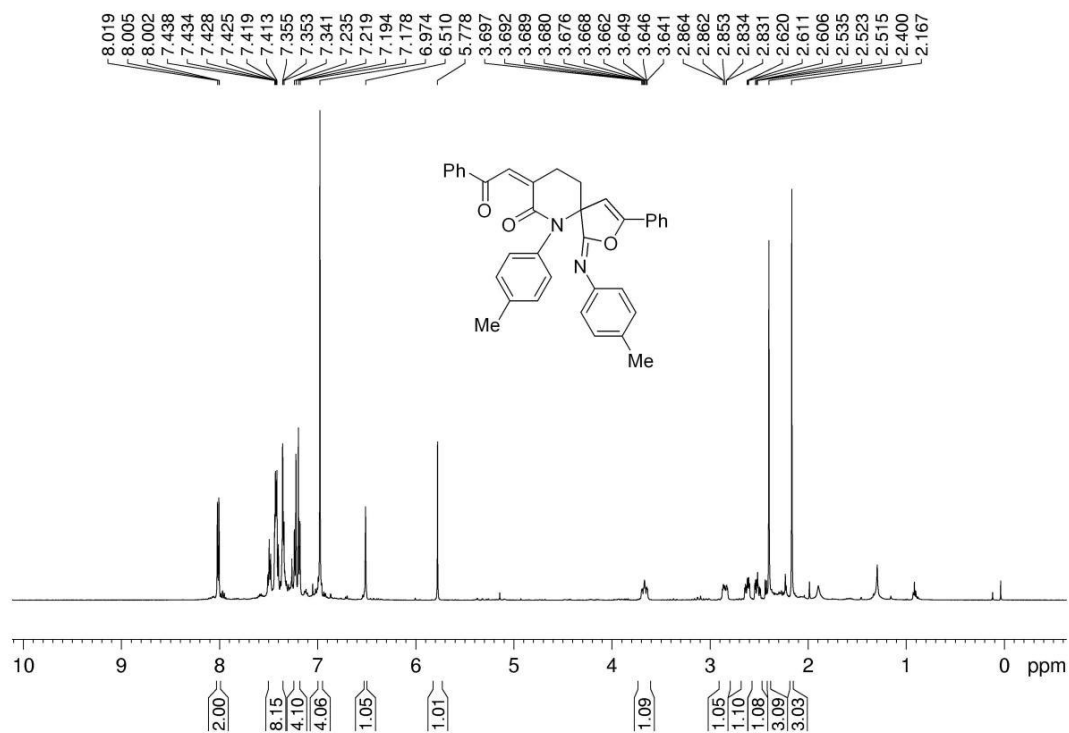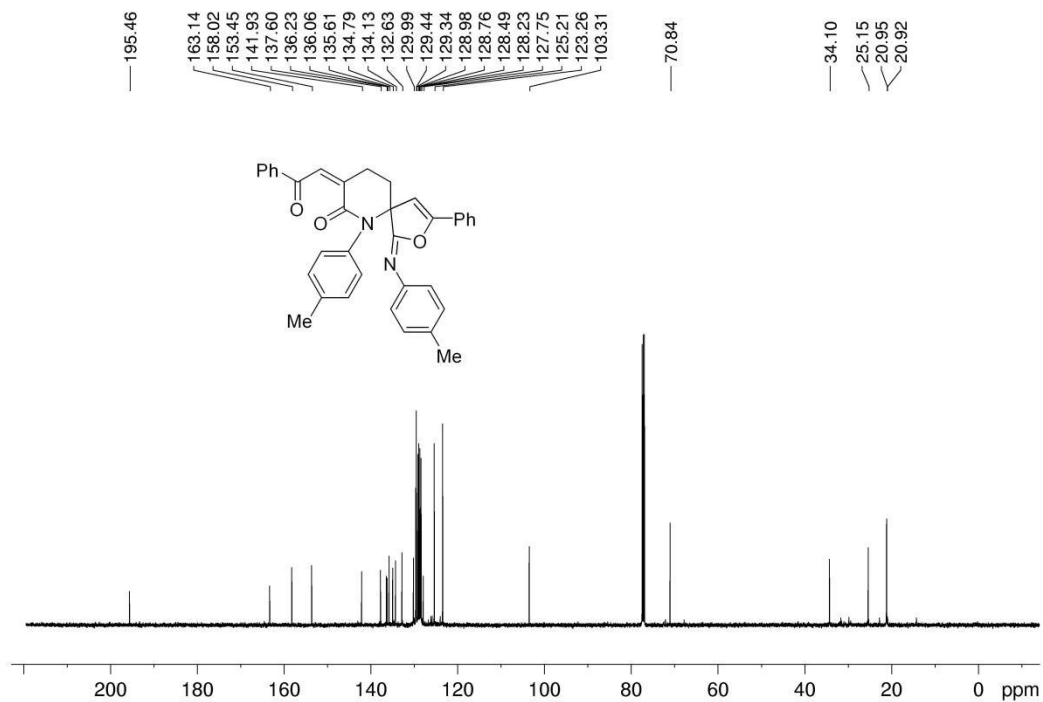

# Compound 3c

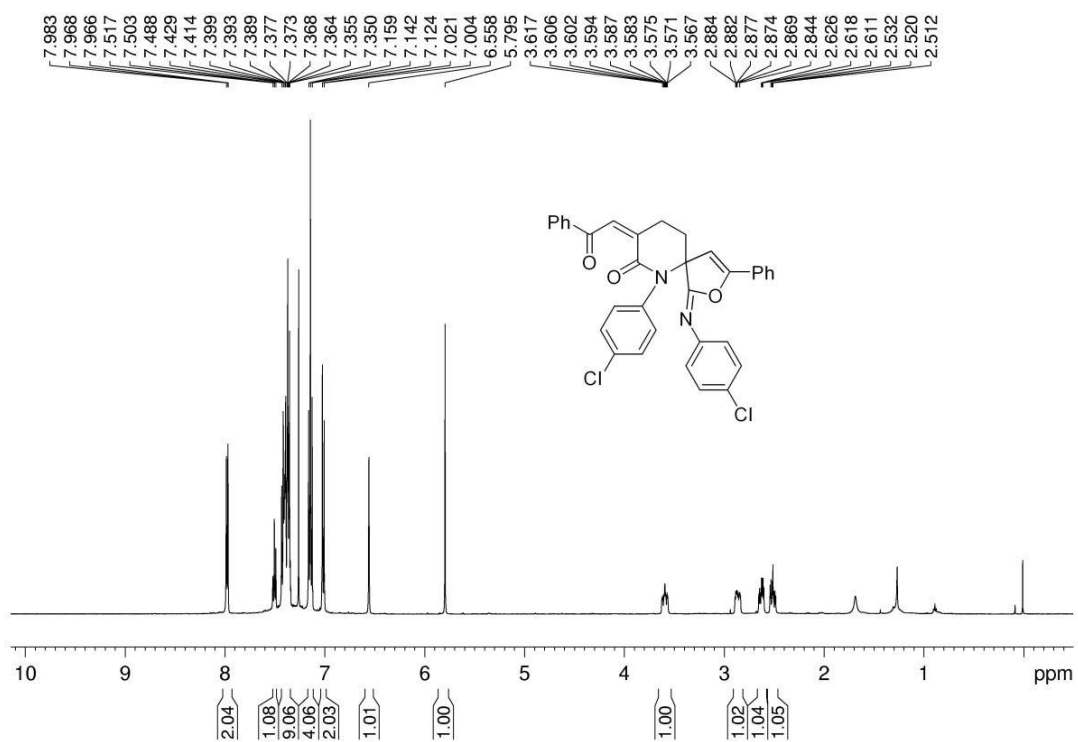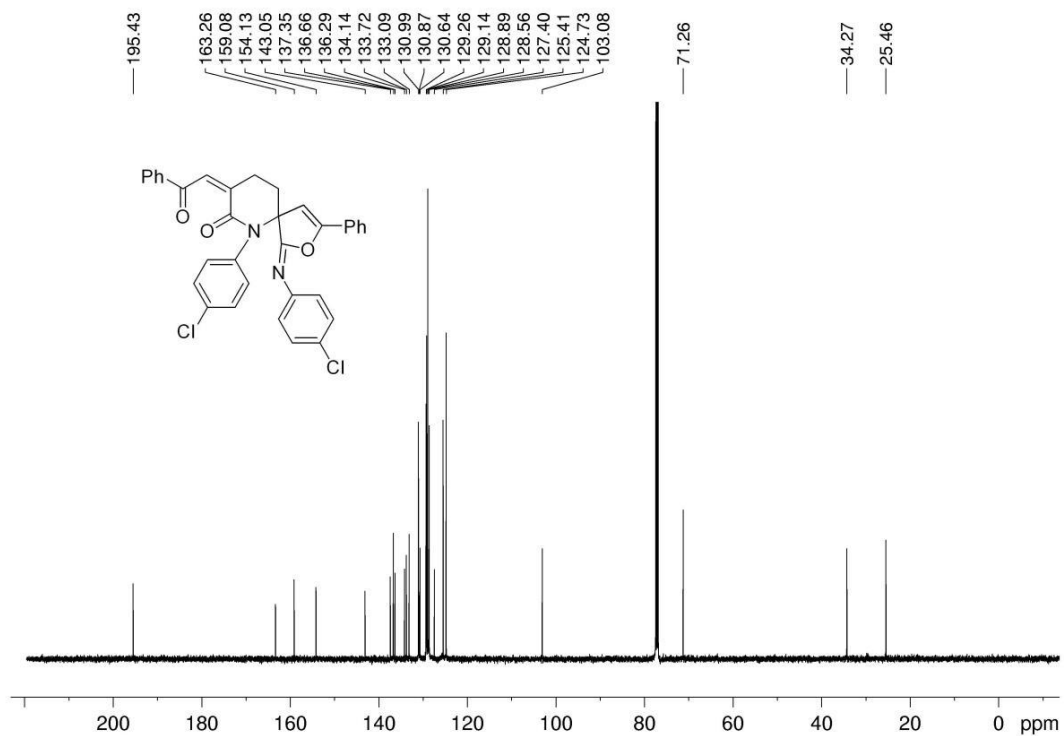



# Compound 3d

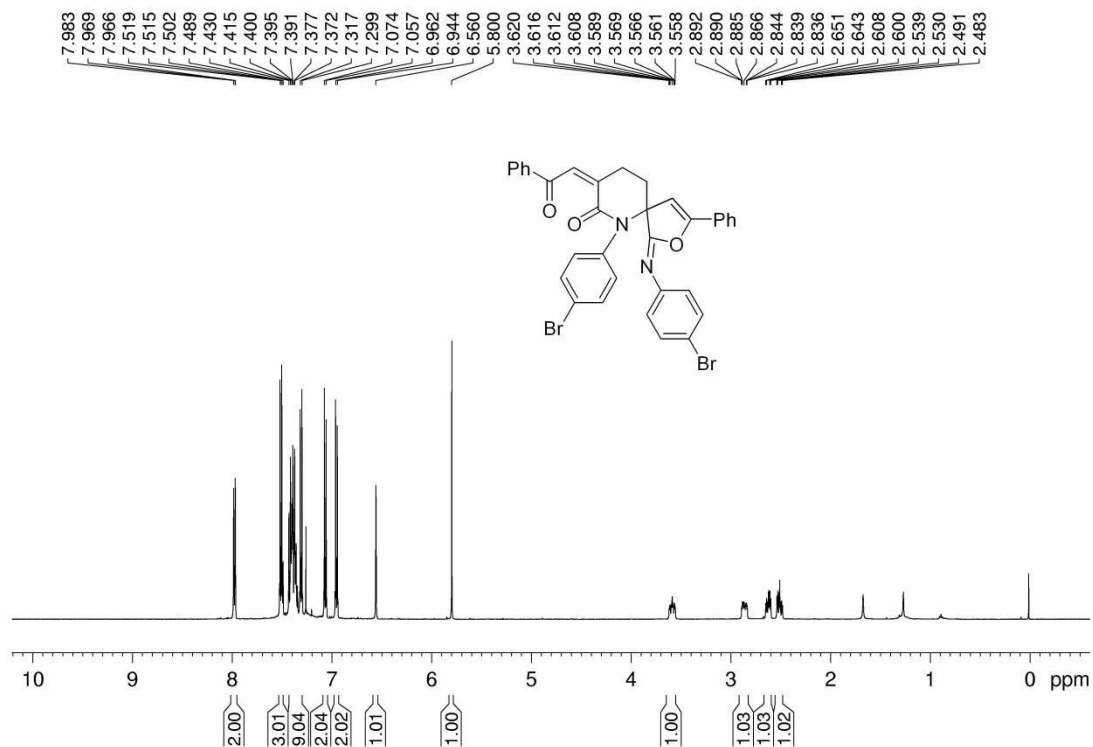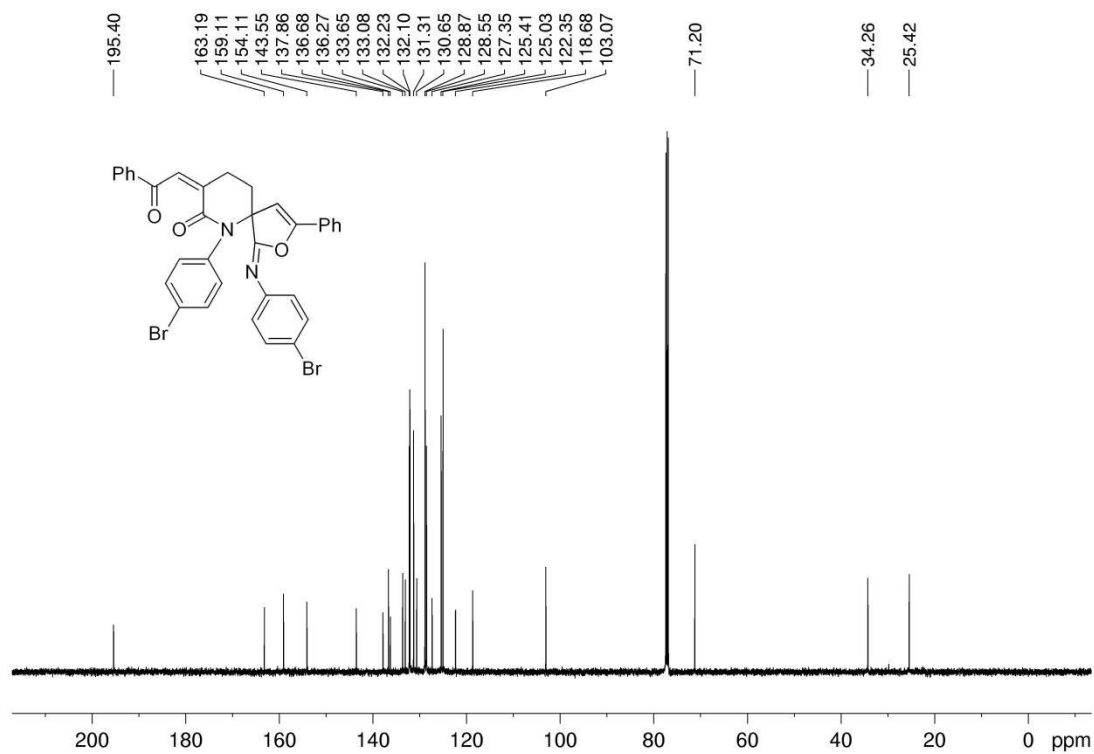

# Compound 3e

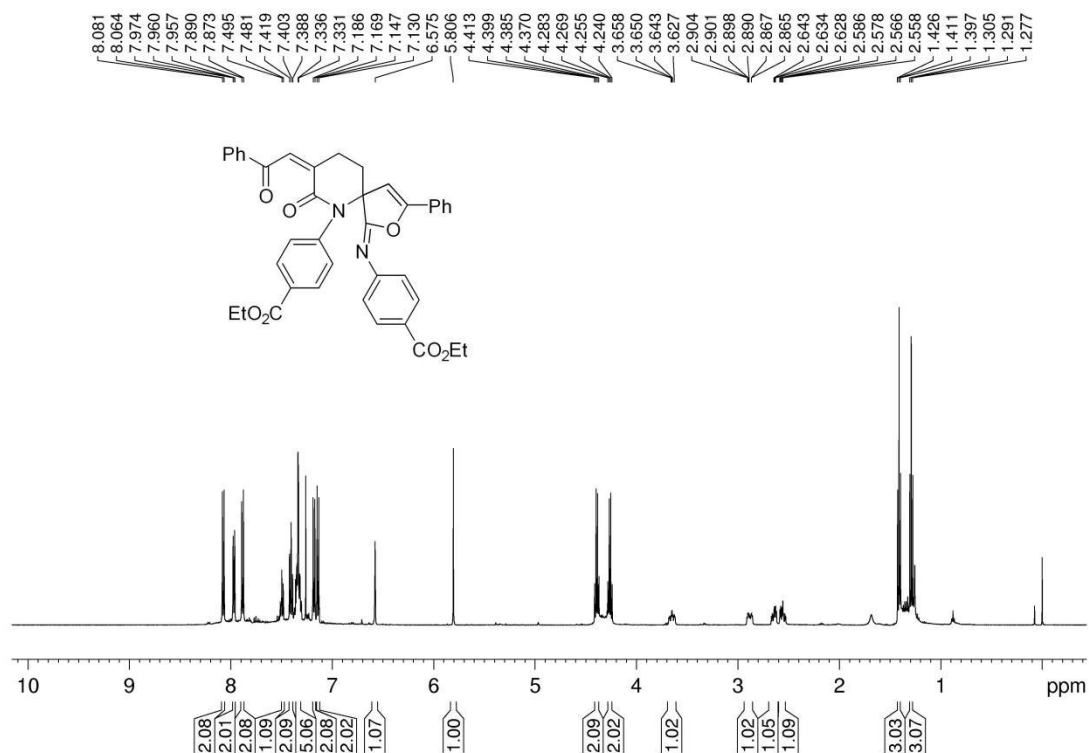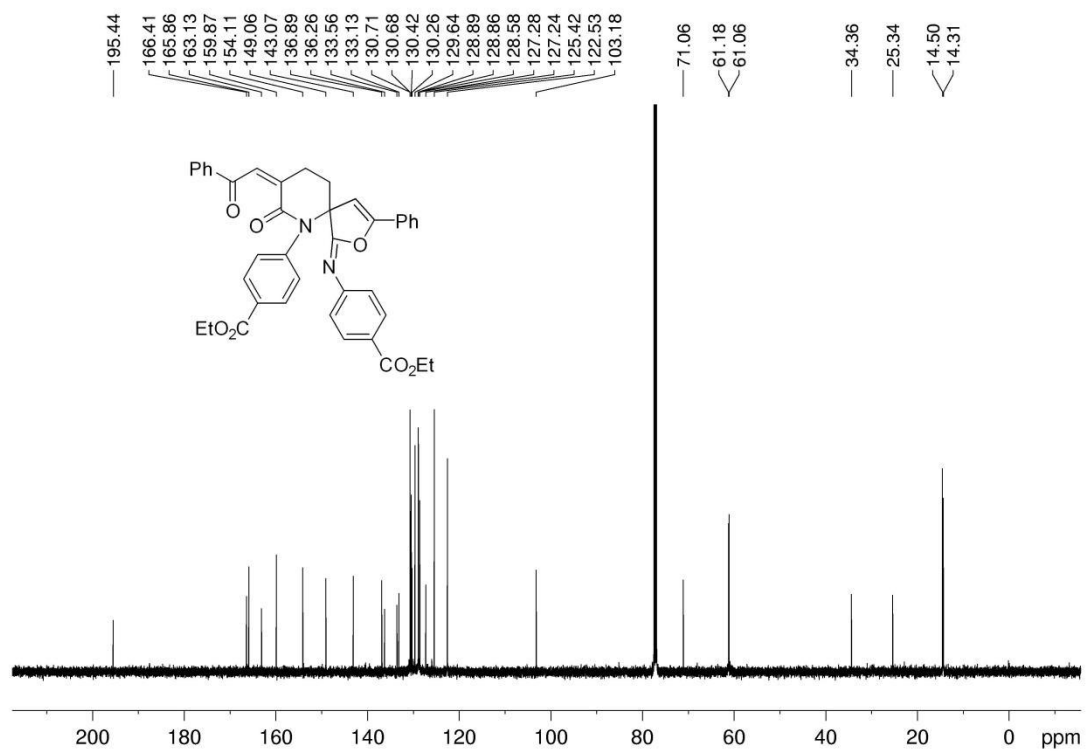

# Compound 3f

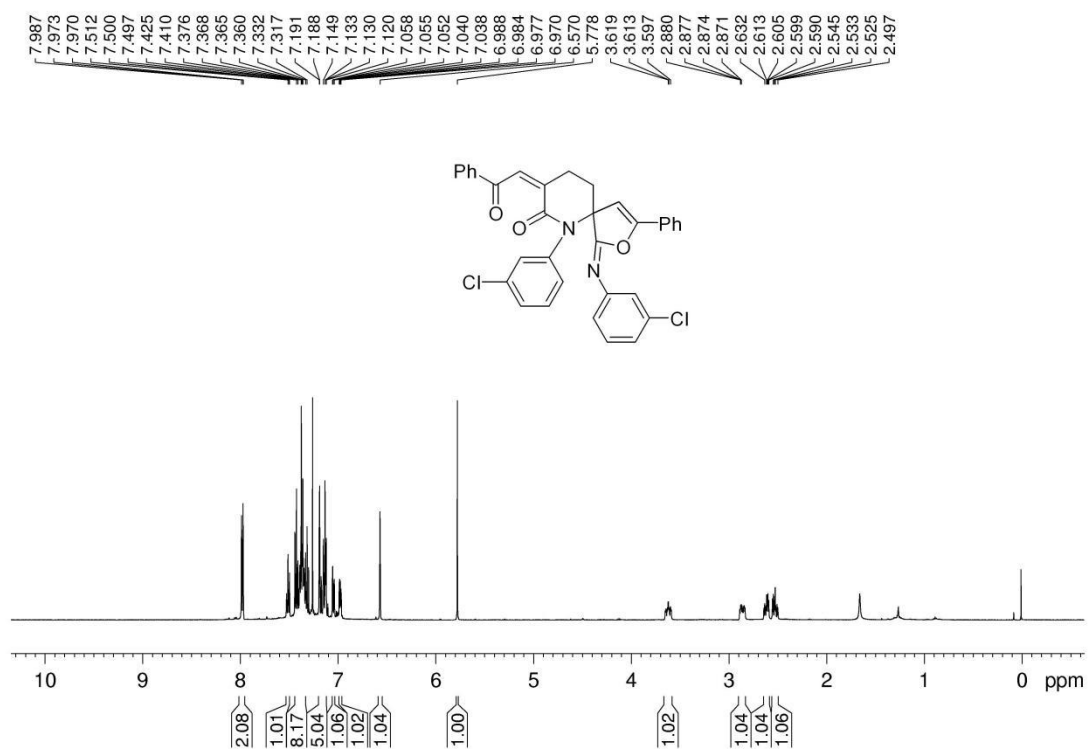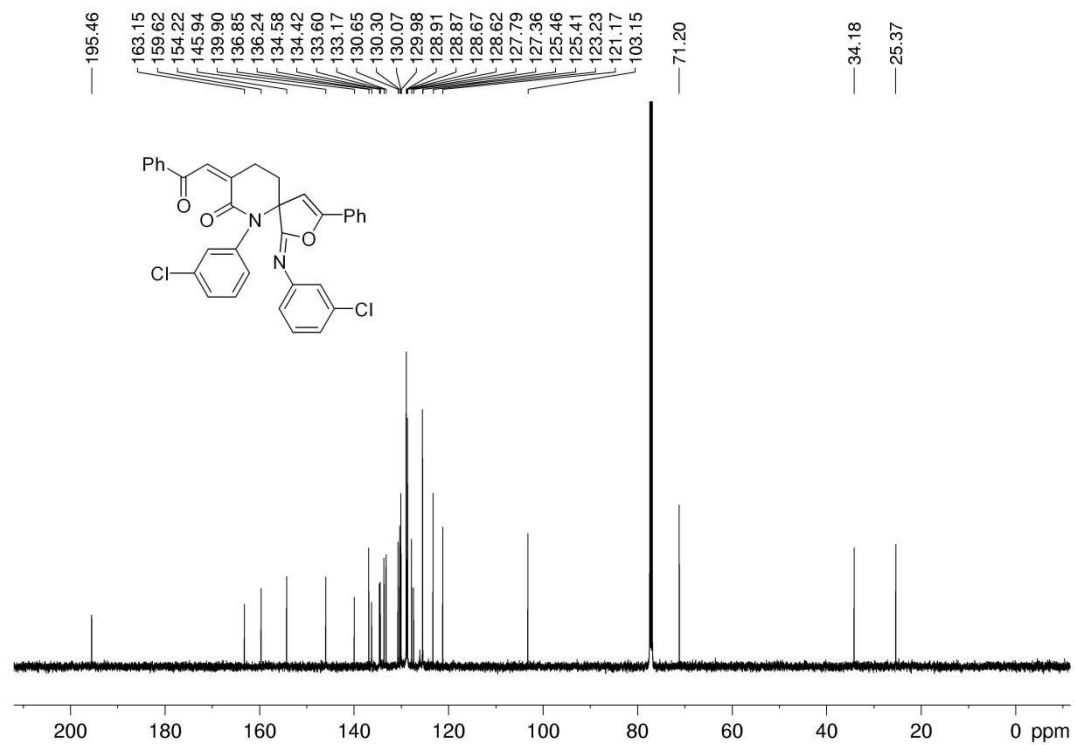

# Compound 3g

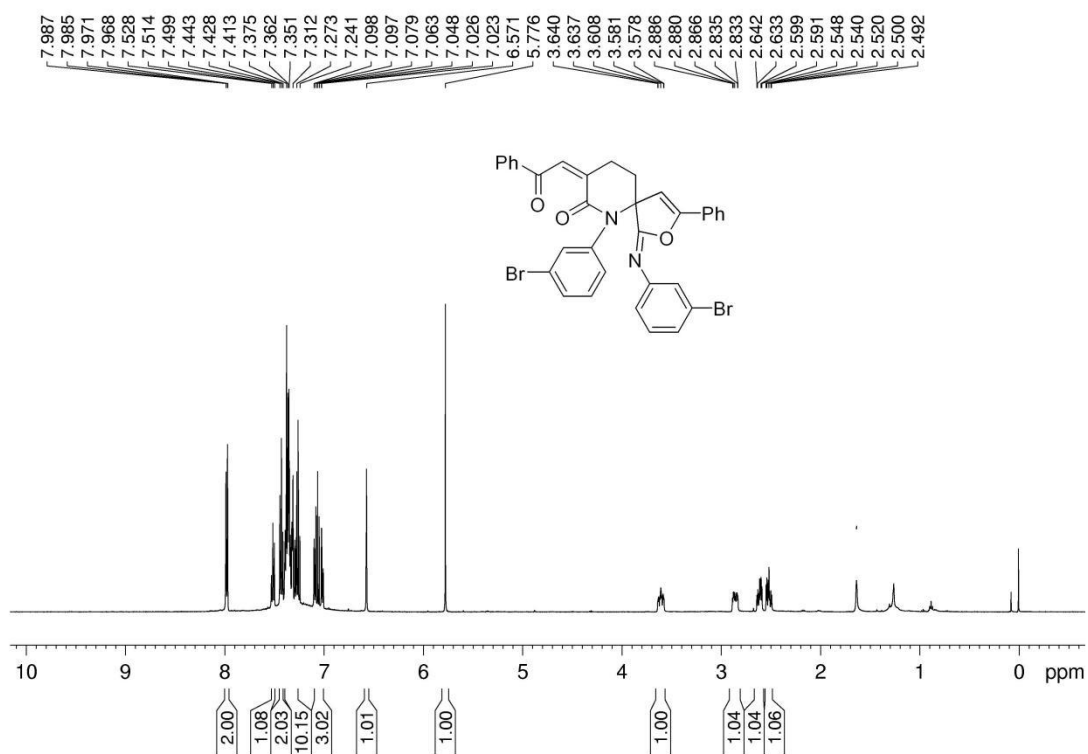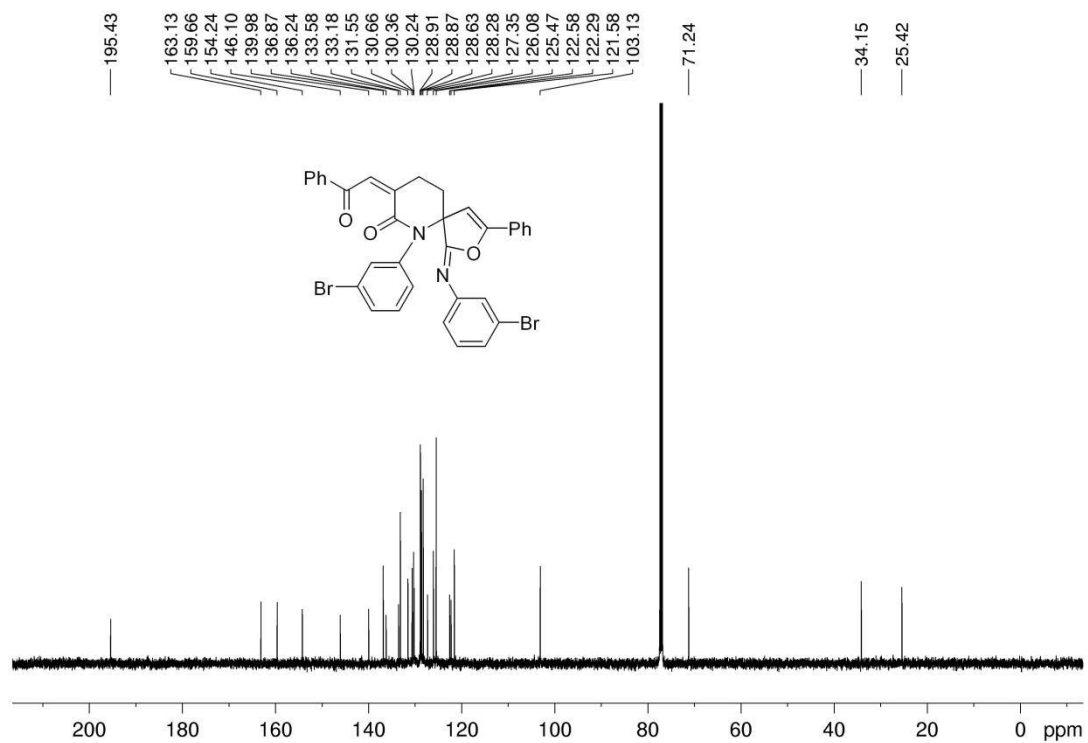

# Compound 3h

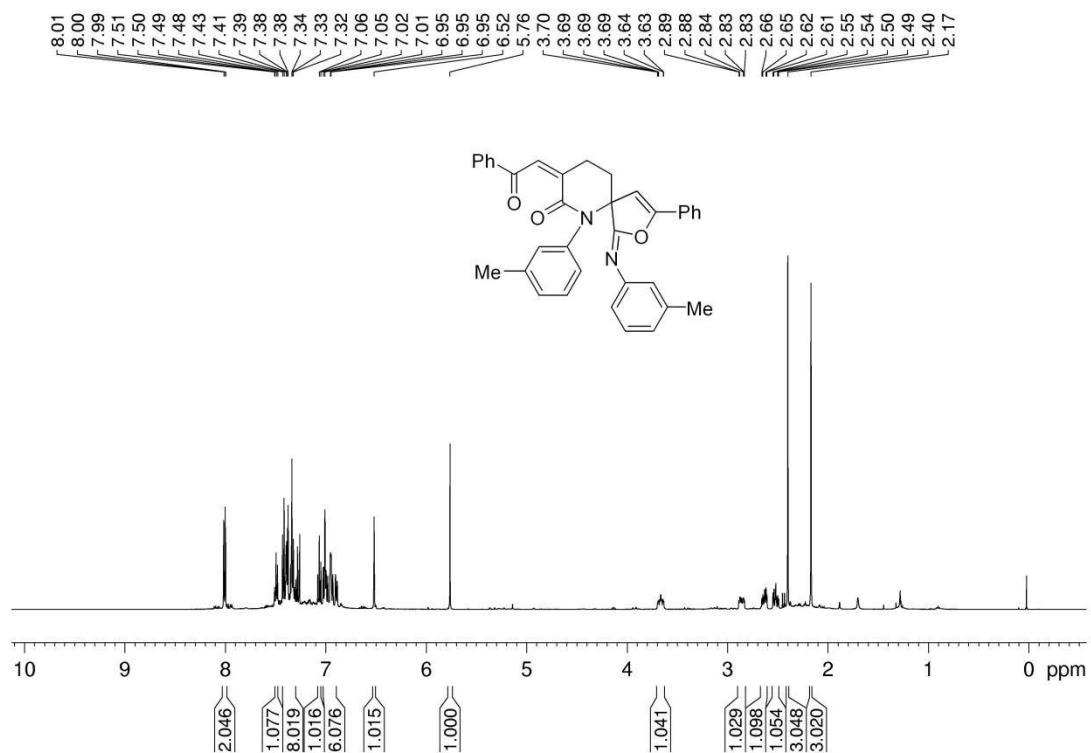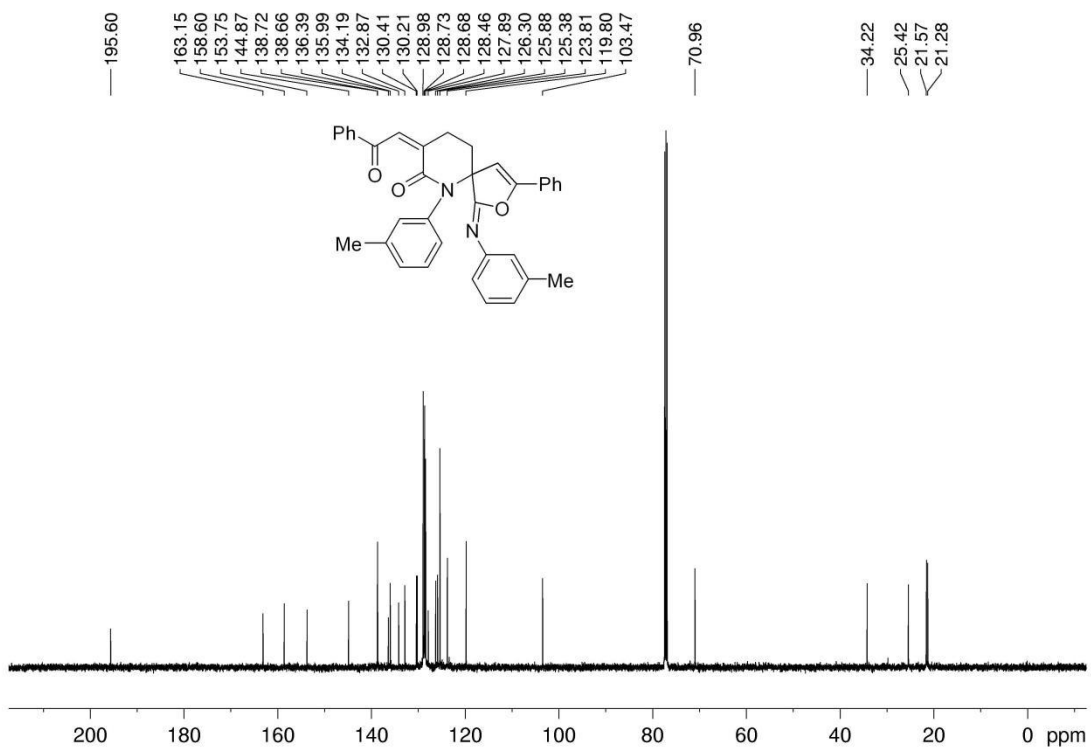

Compound **3i**

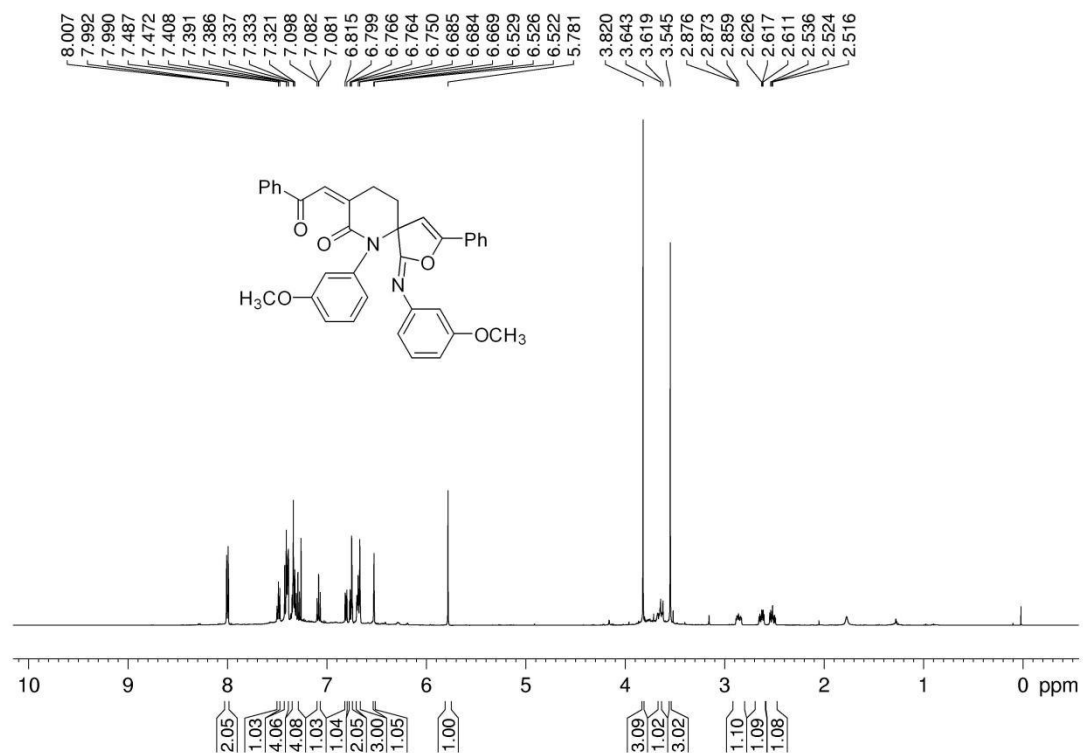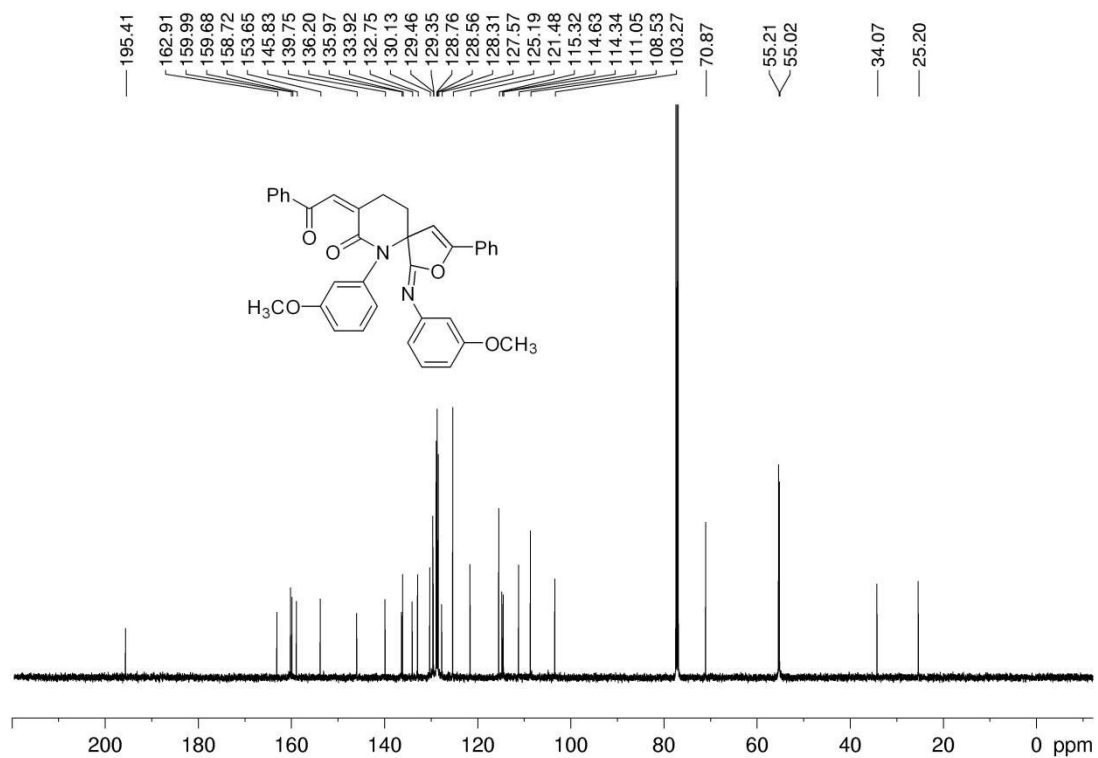

Compound **3j**

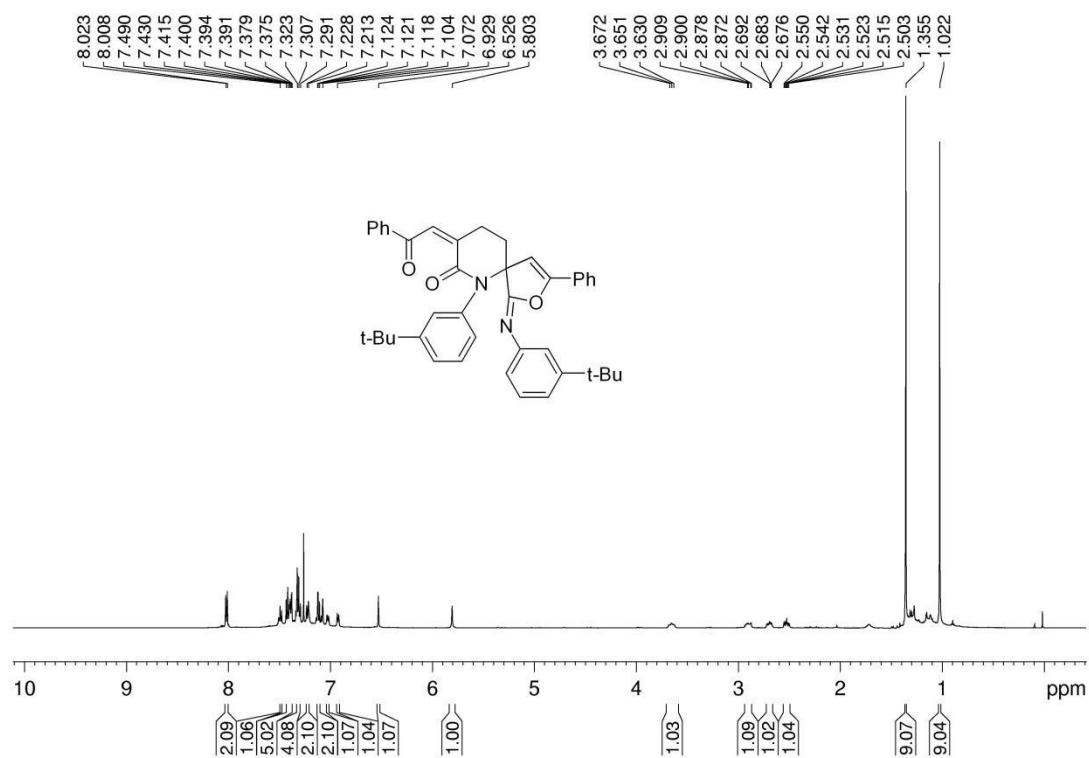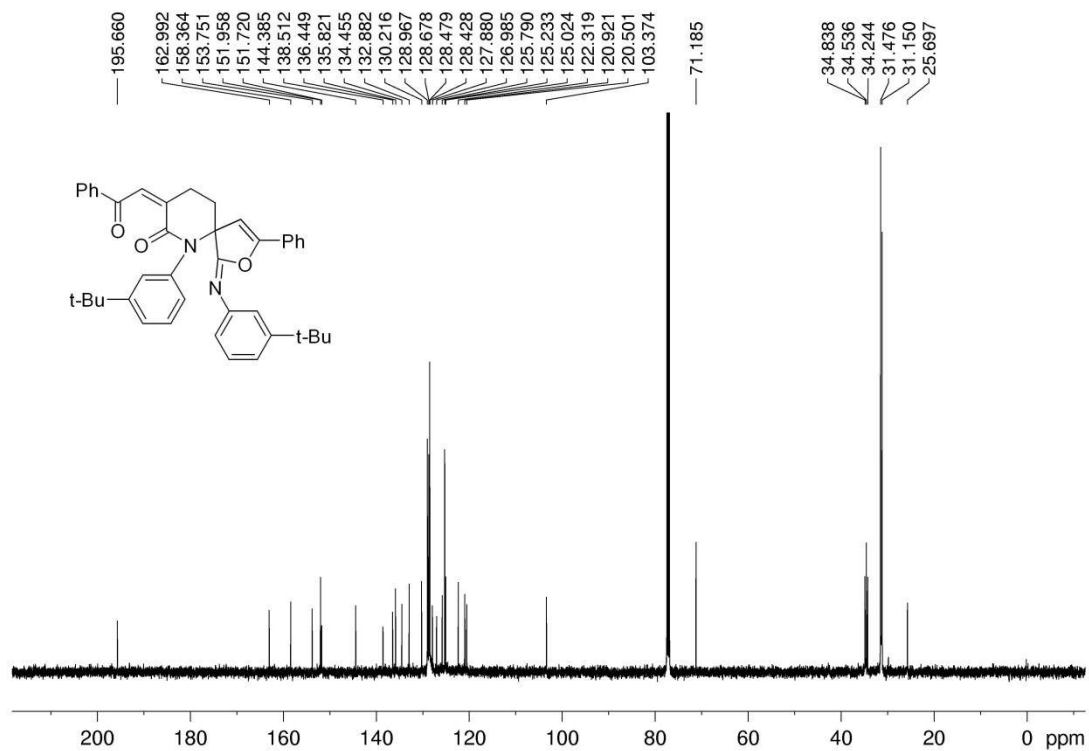

# Compound 3k

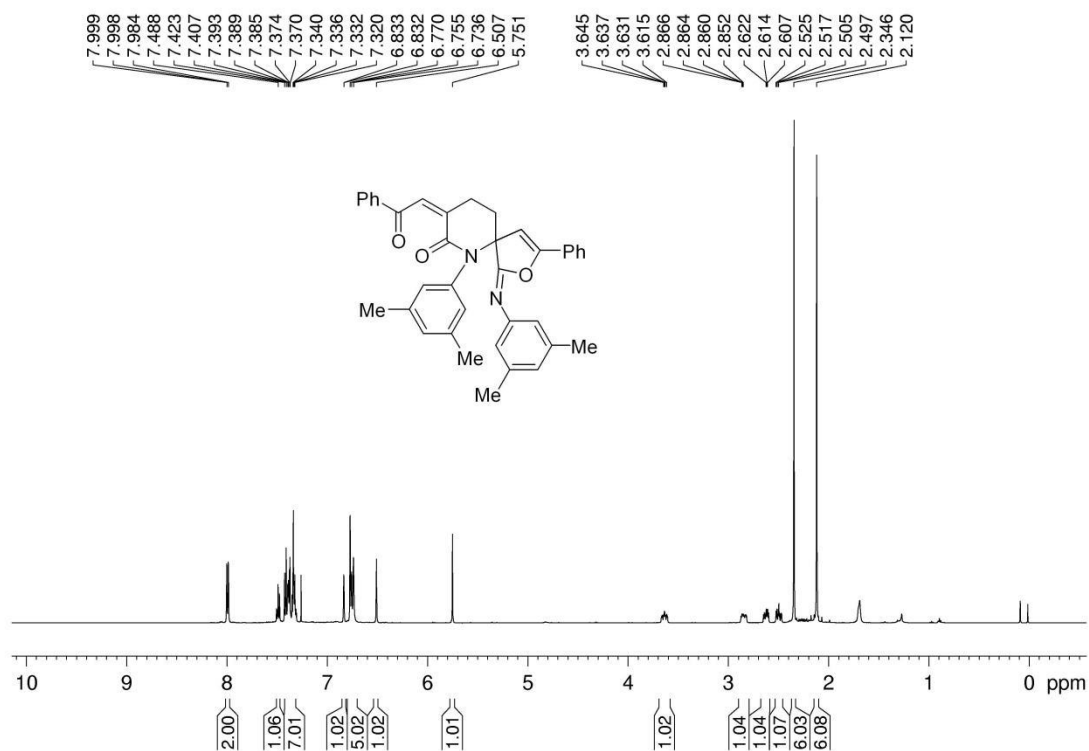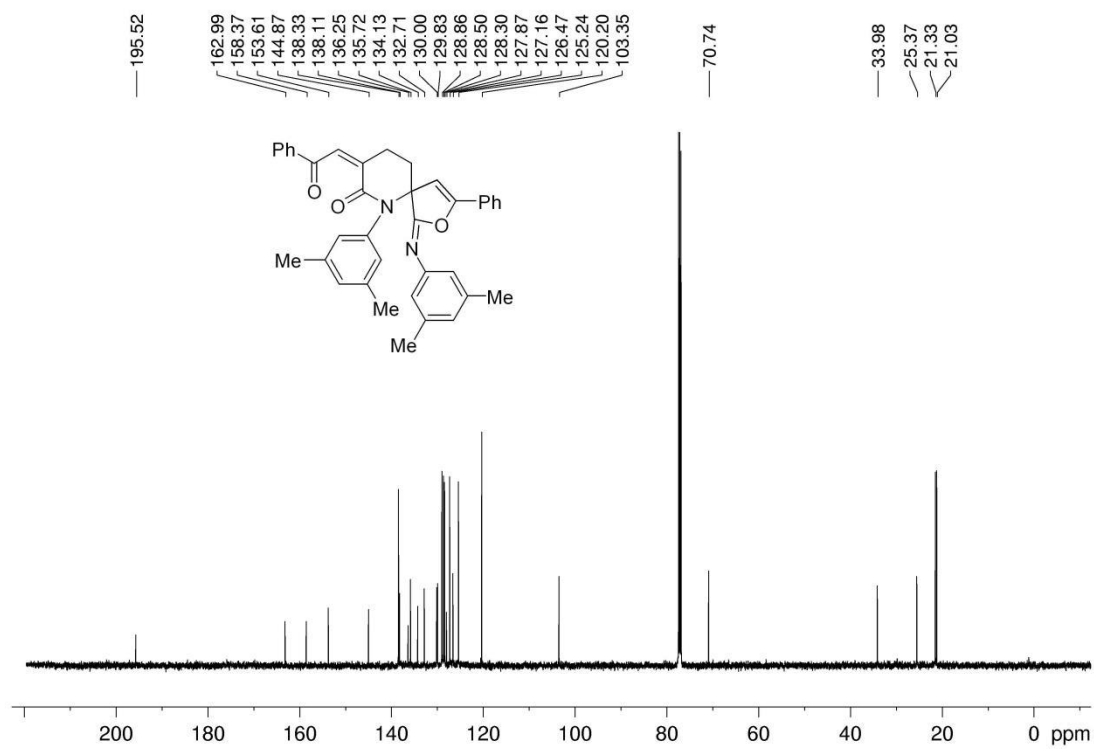



# Compound 31

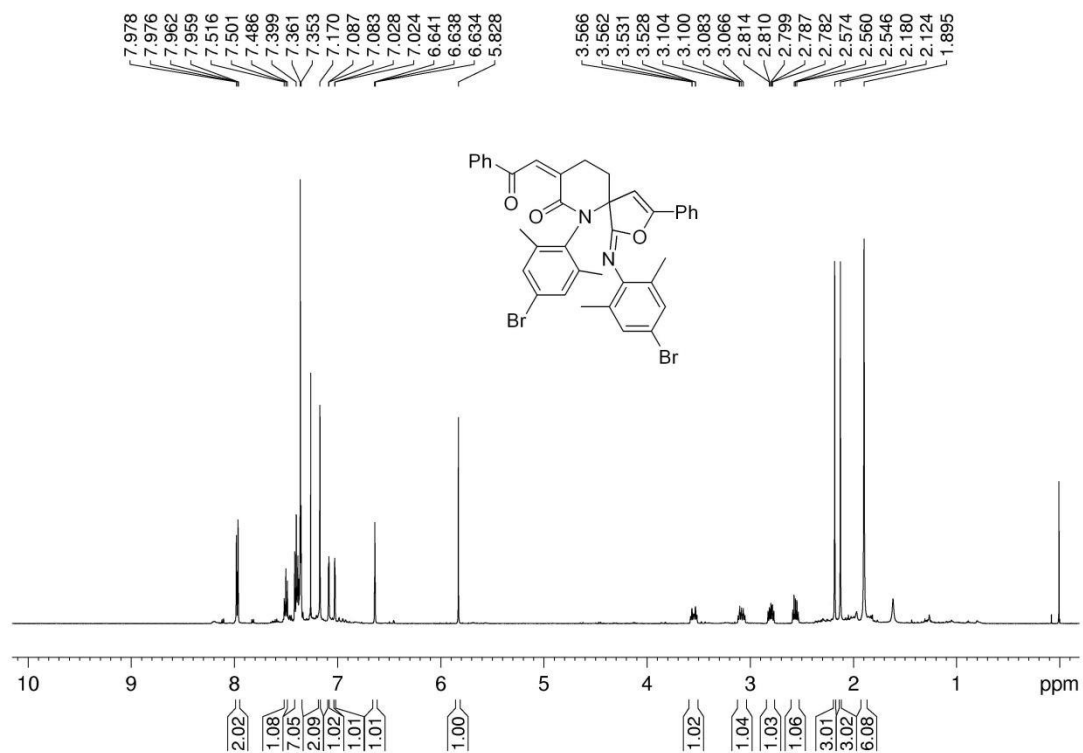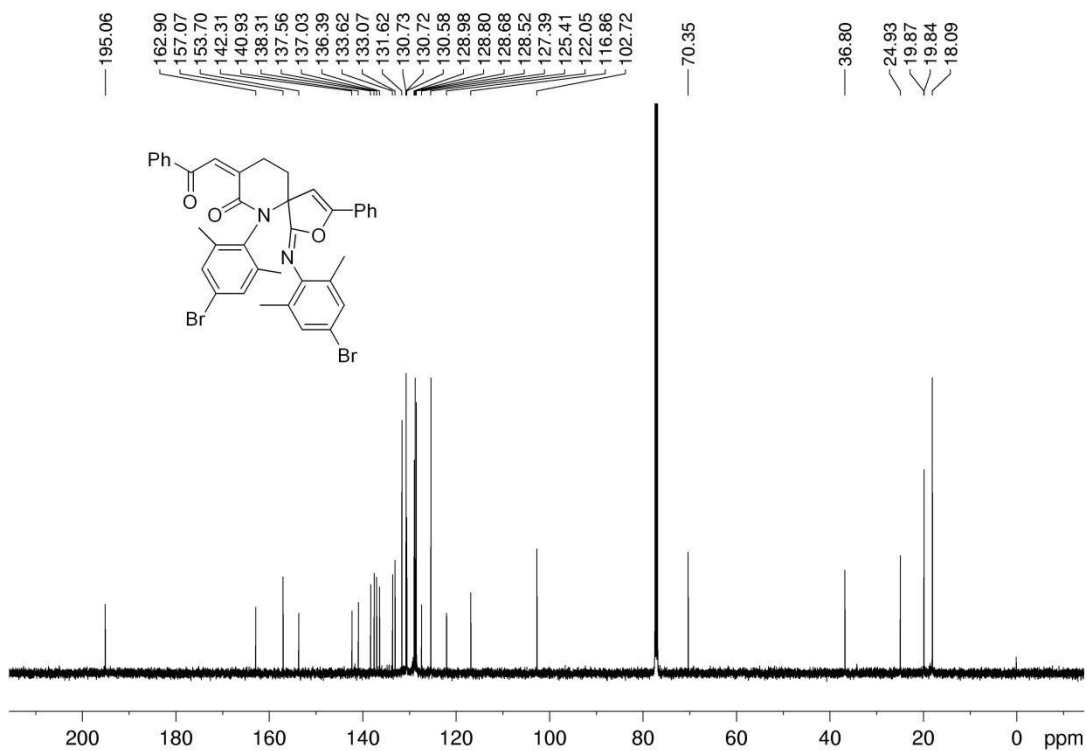

# Compound 3m

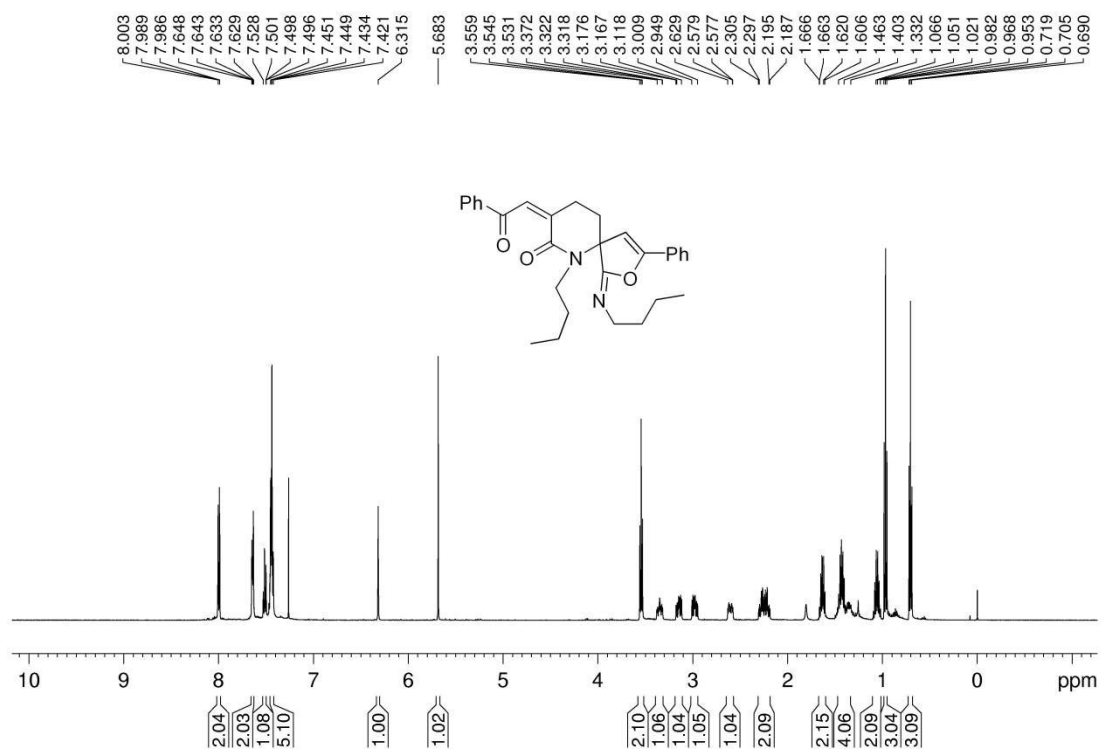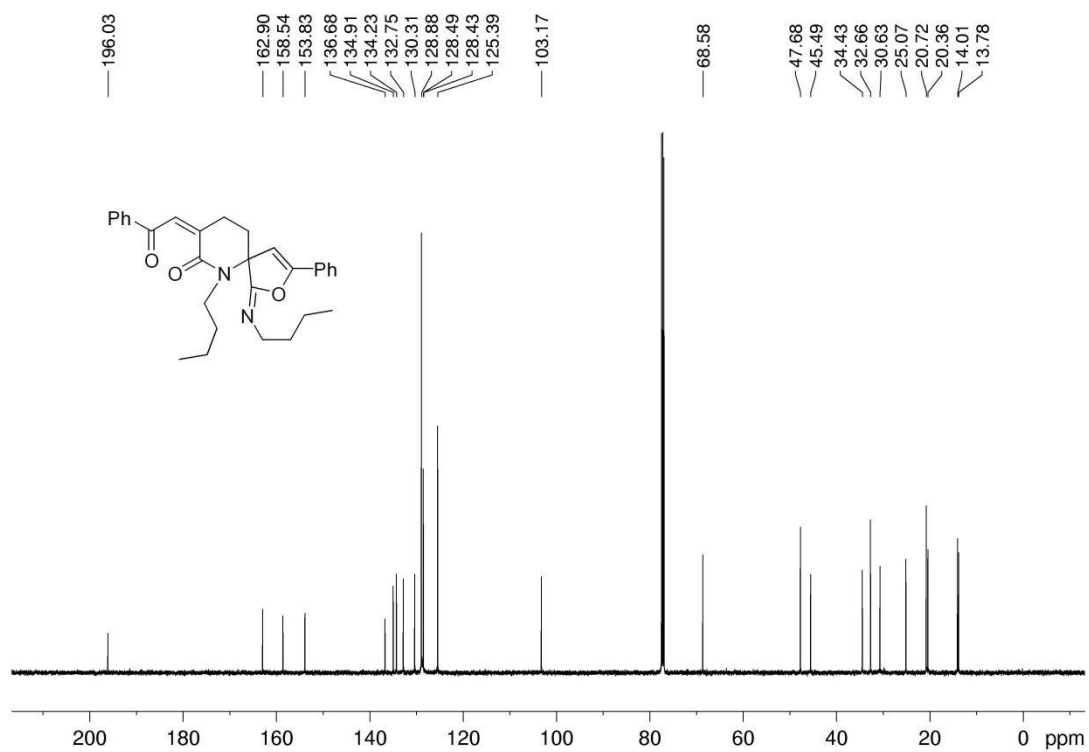

# Compound 3n

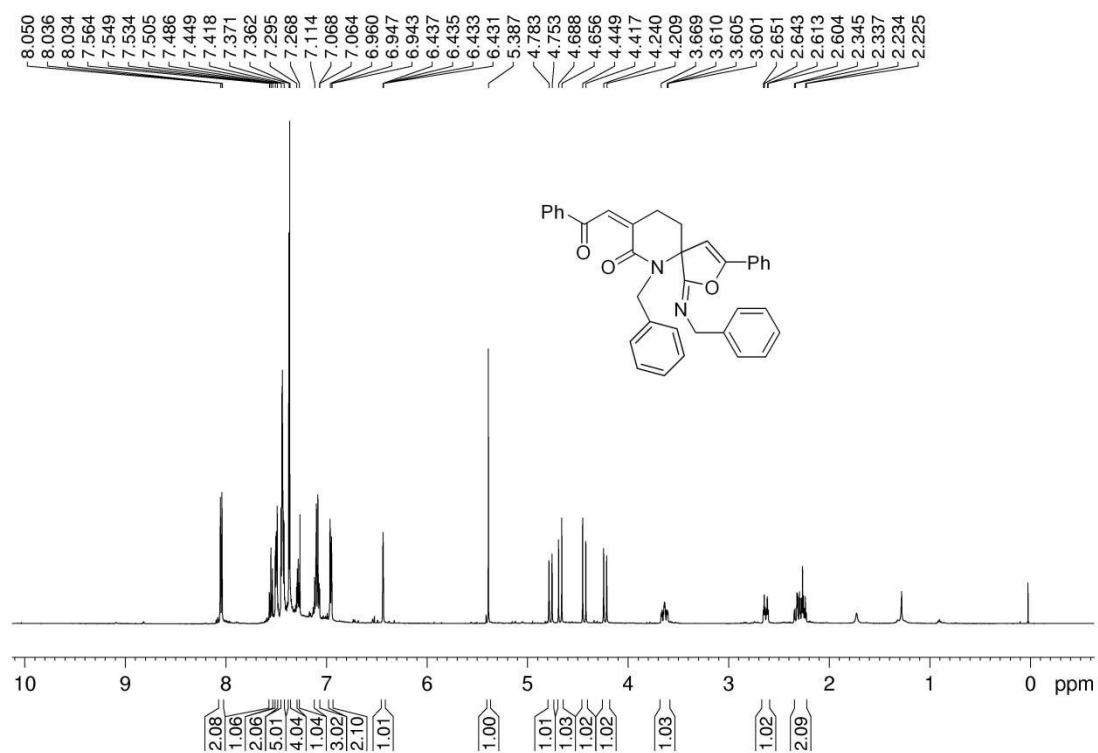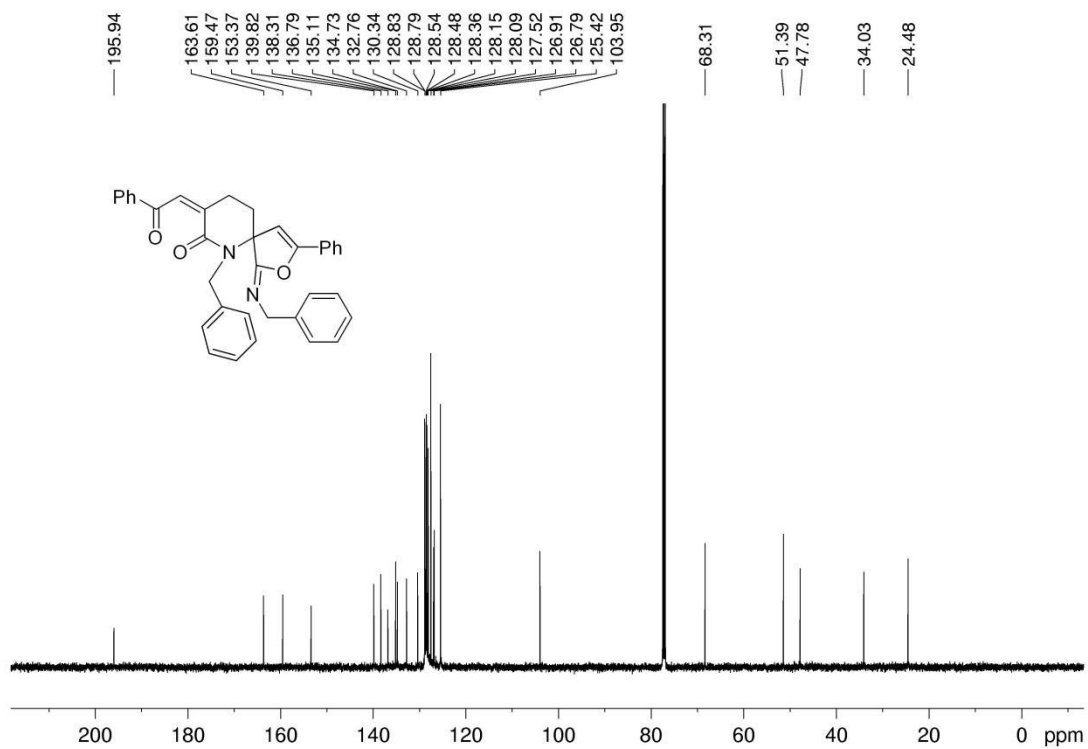

# Compound 3o

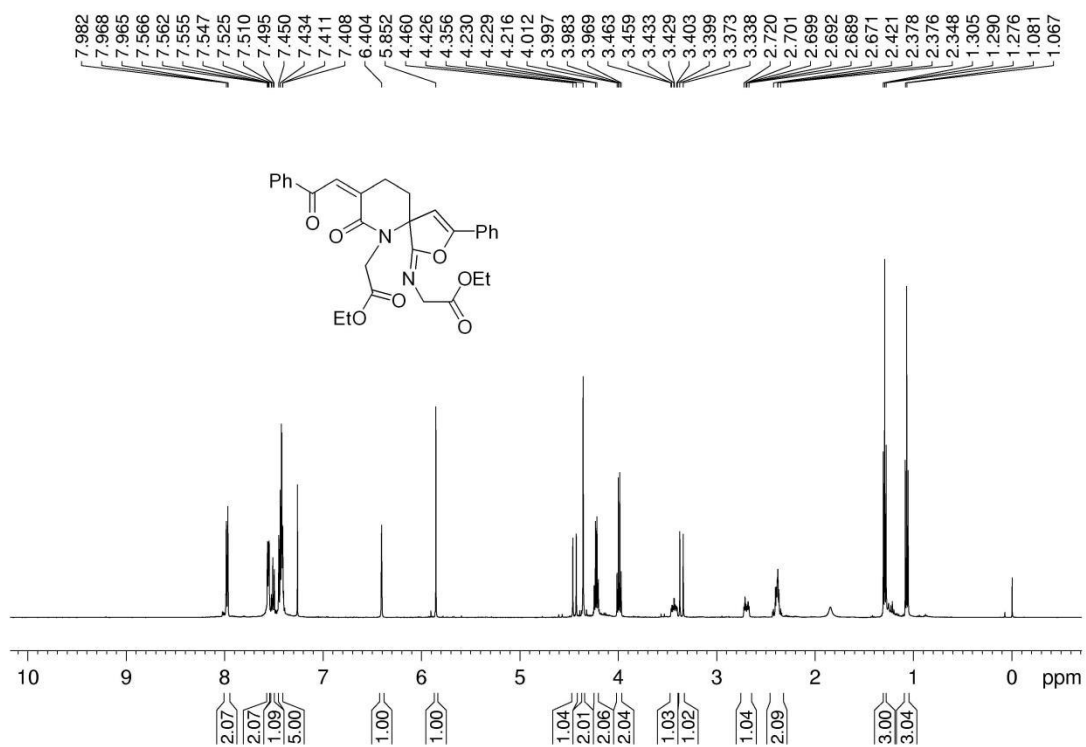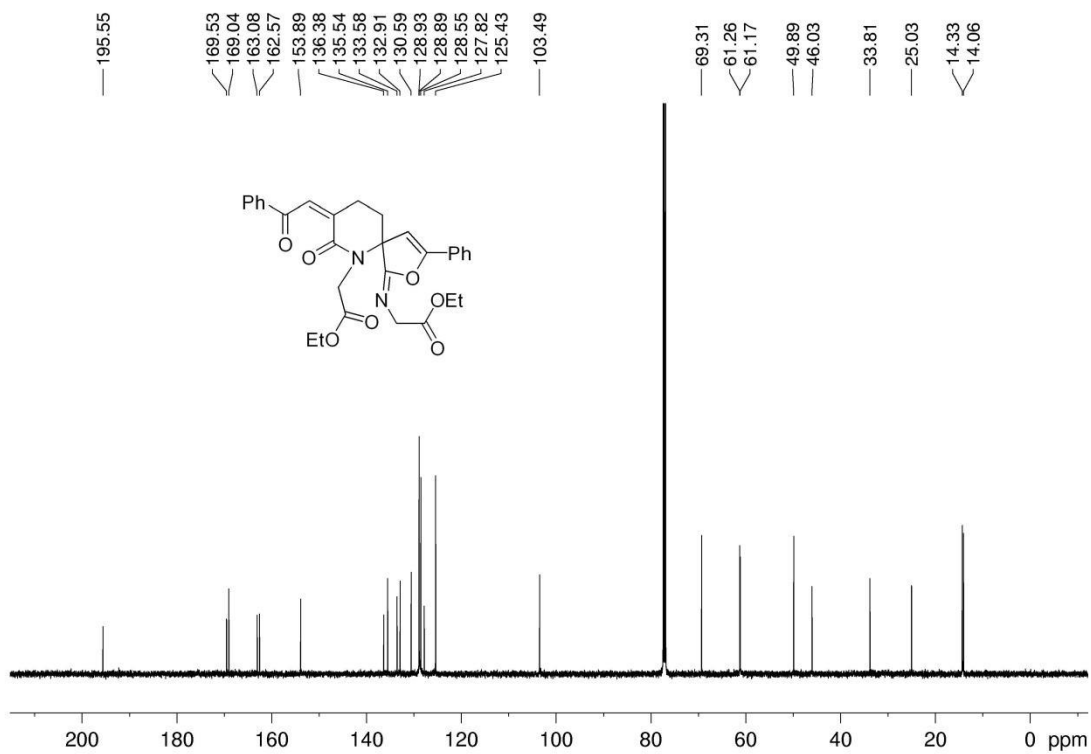

# Compound 4a

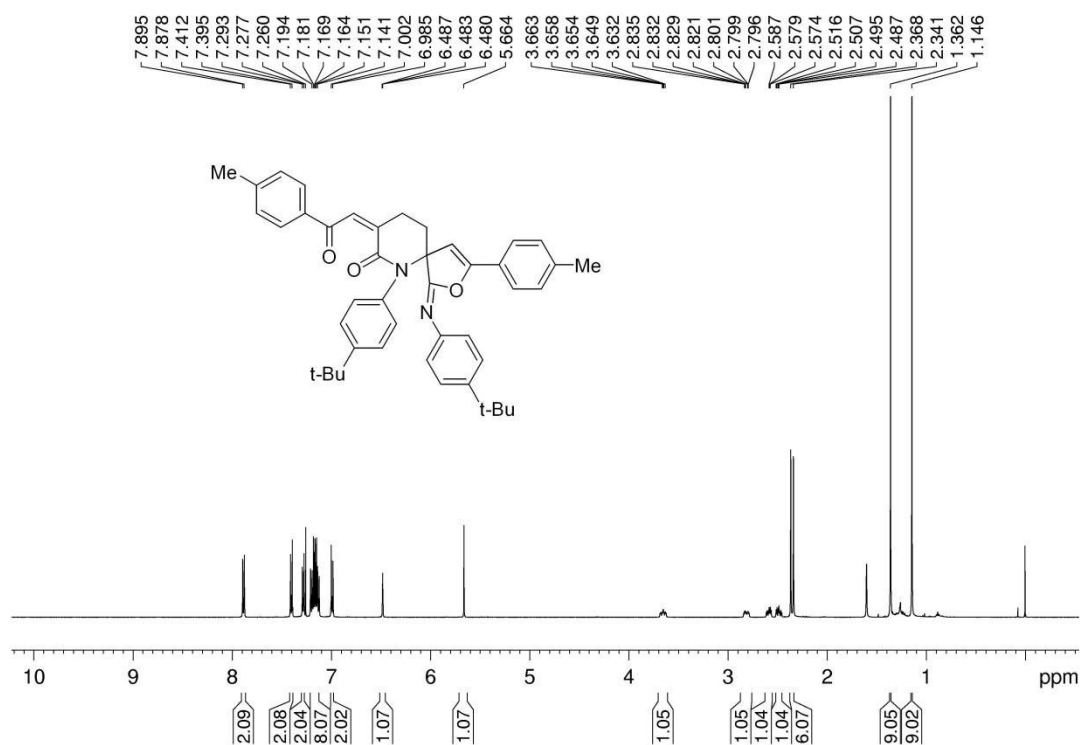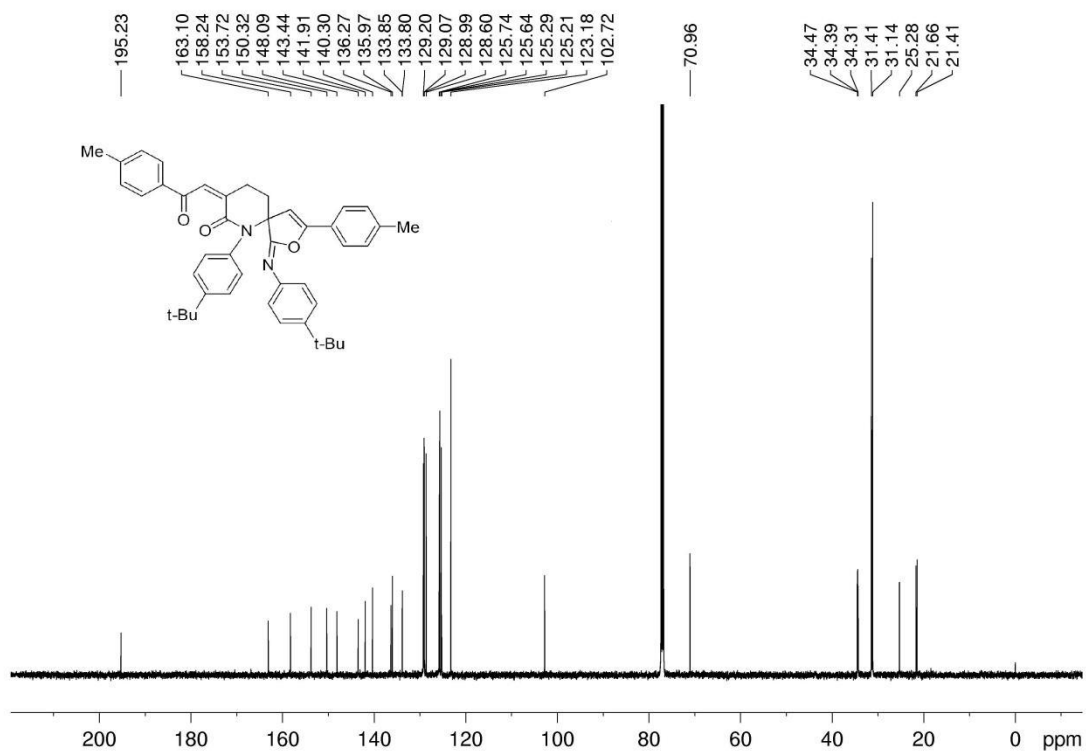

# Compound 4b

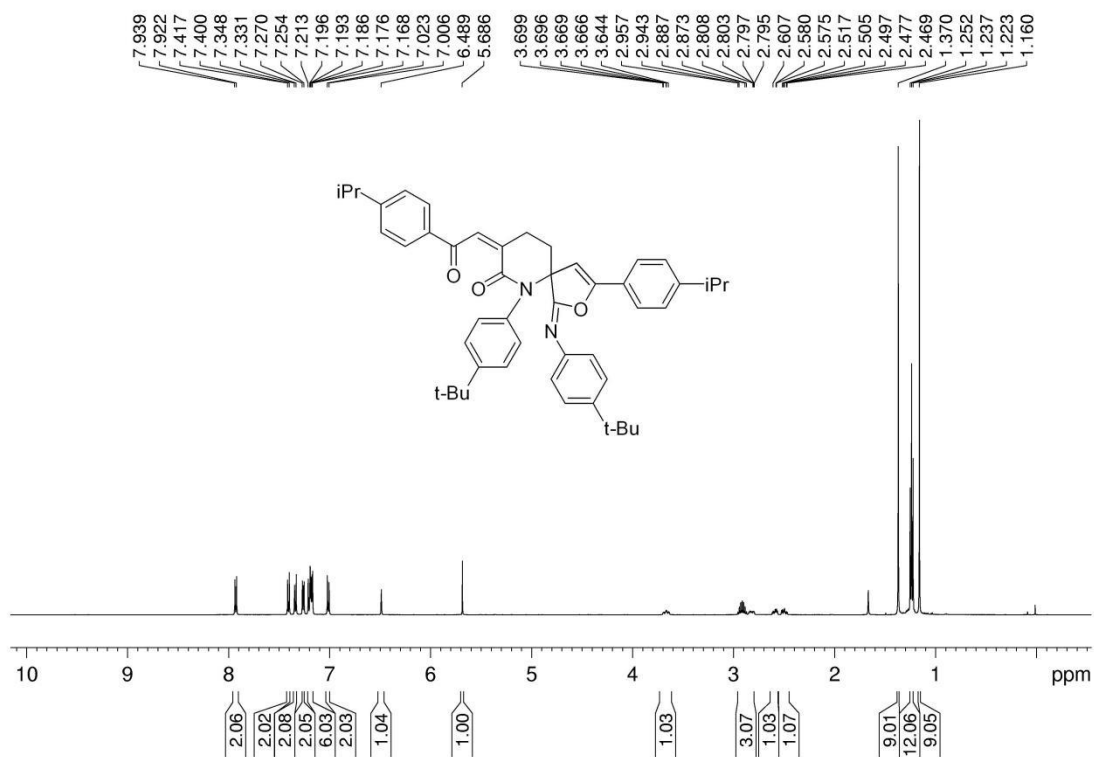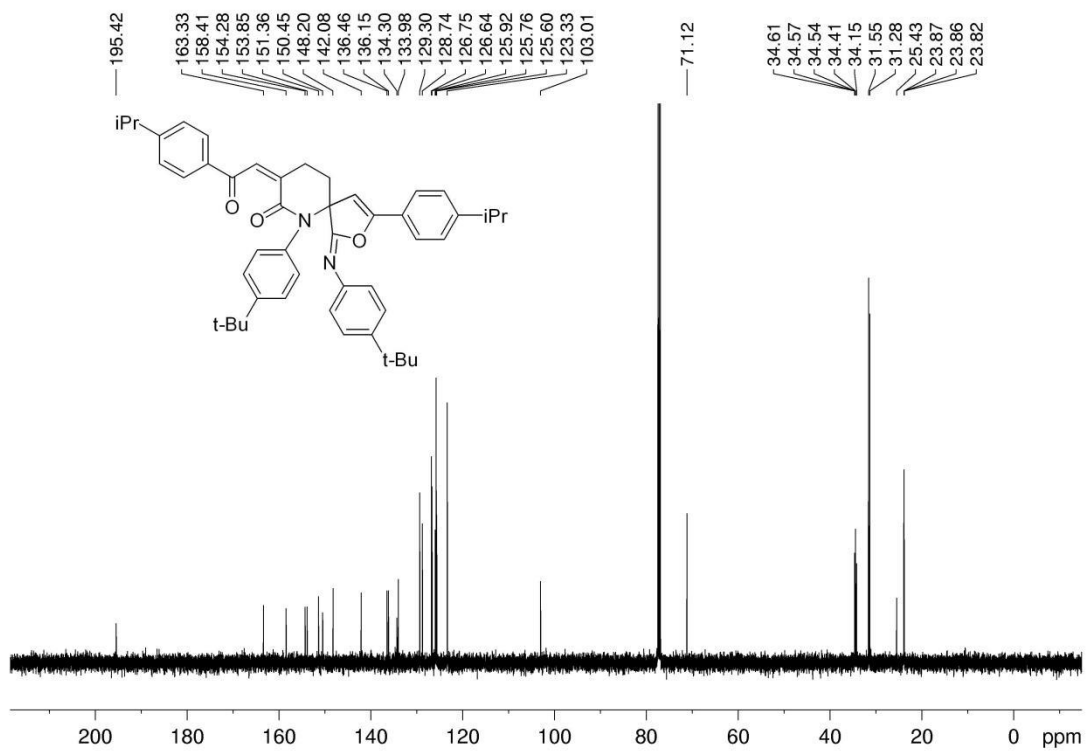

# Compound 4c

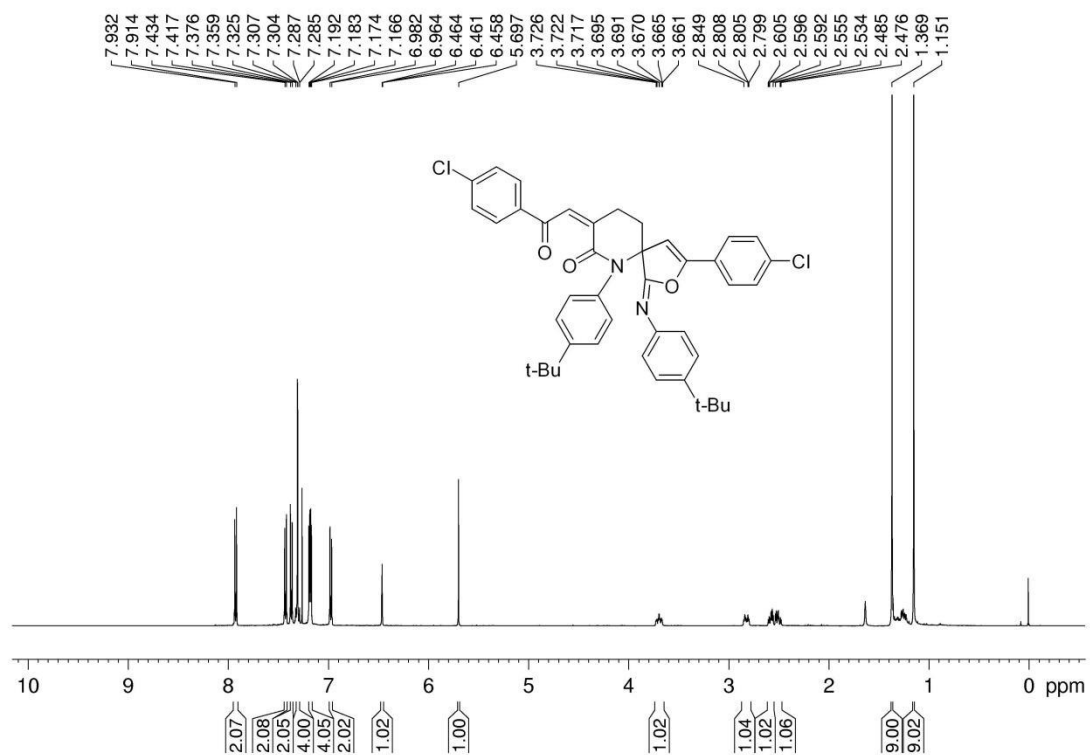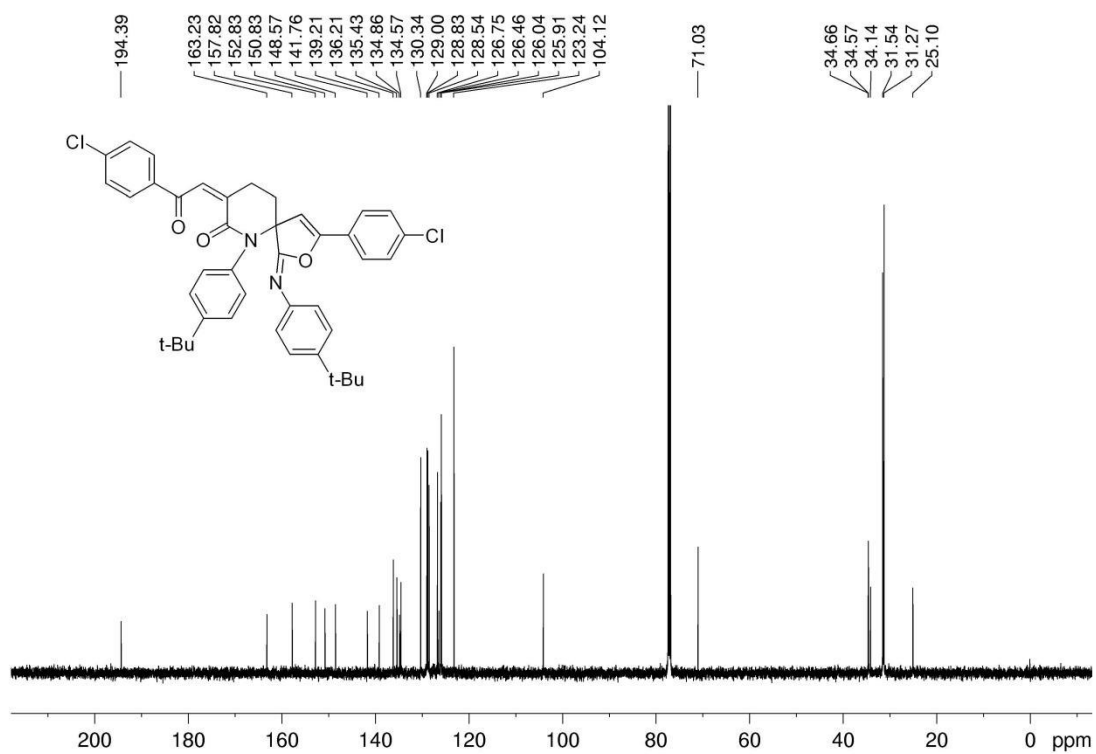

# Compound 4d

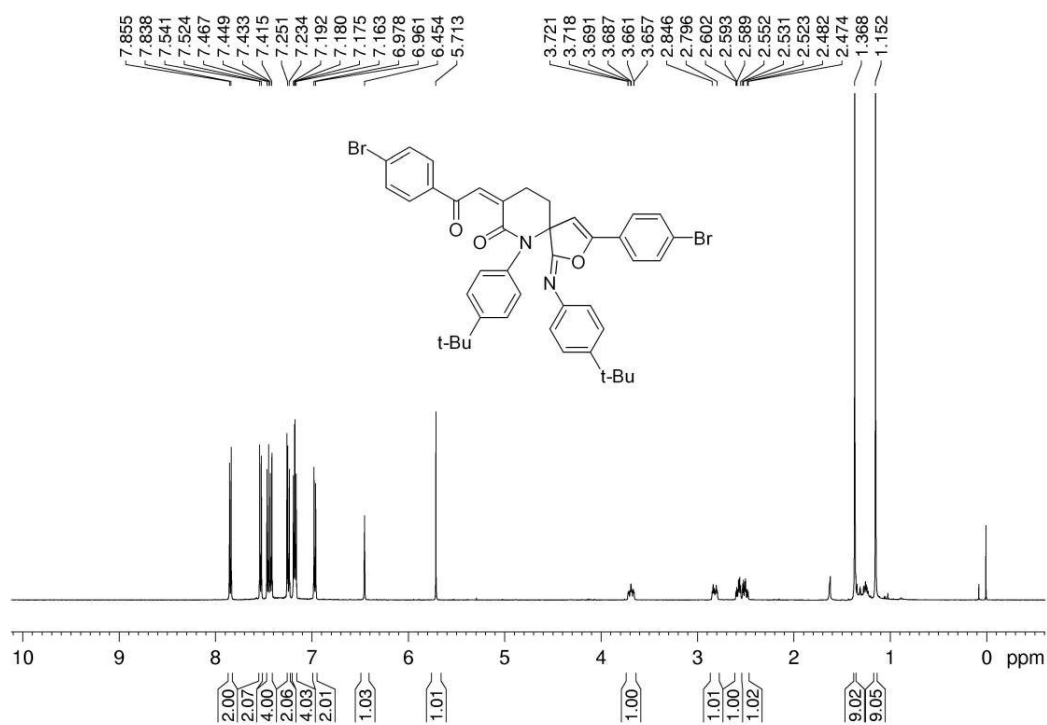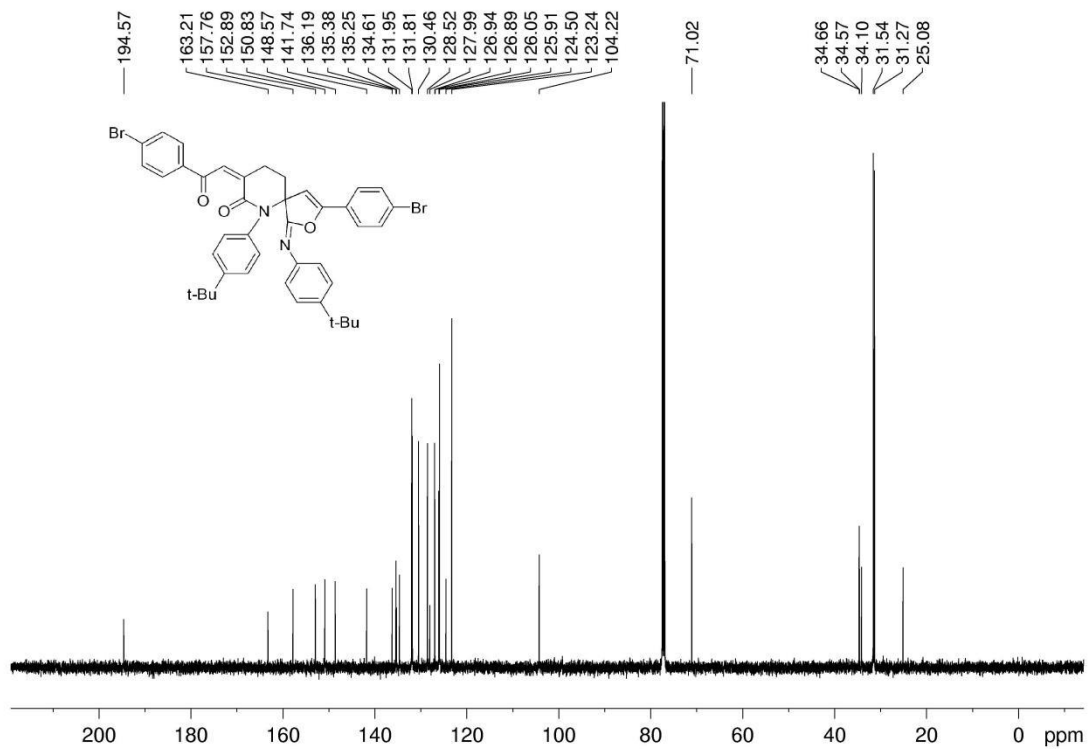



# Compound 4e

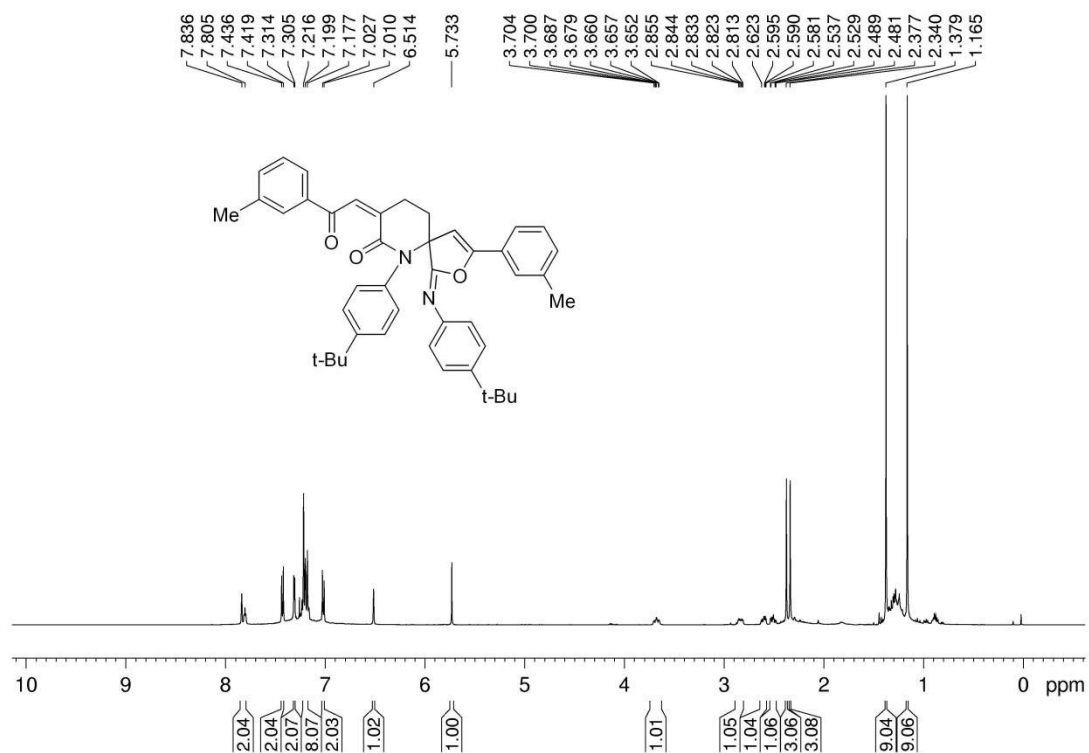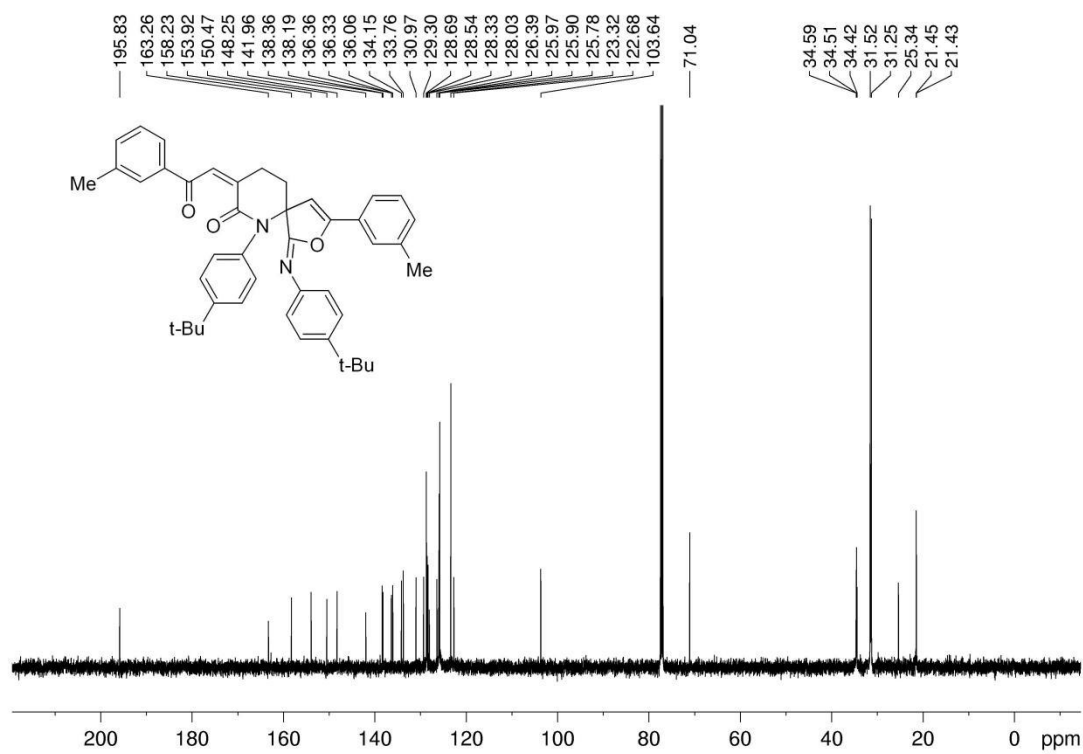

# Compound 4f

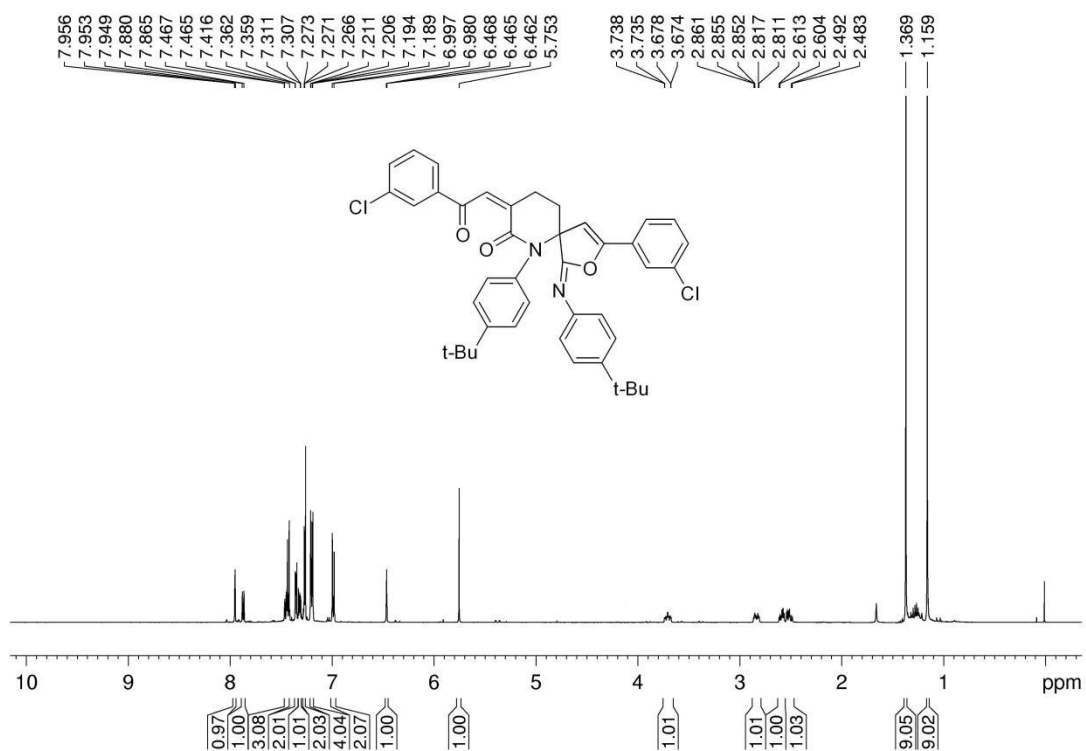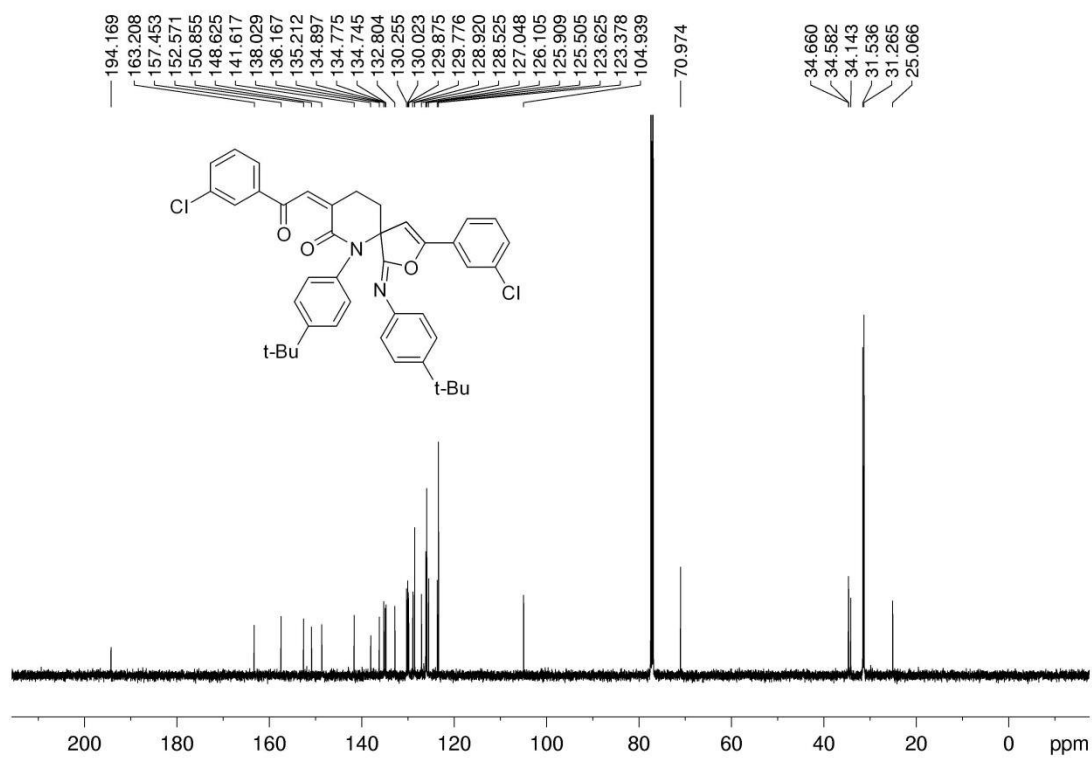

# Compound 4g

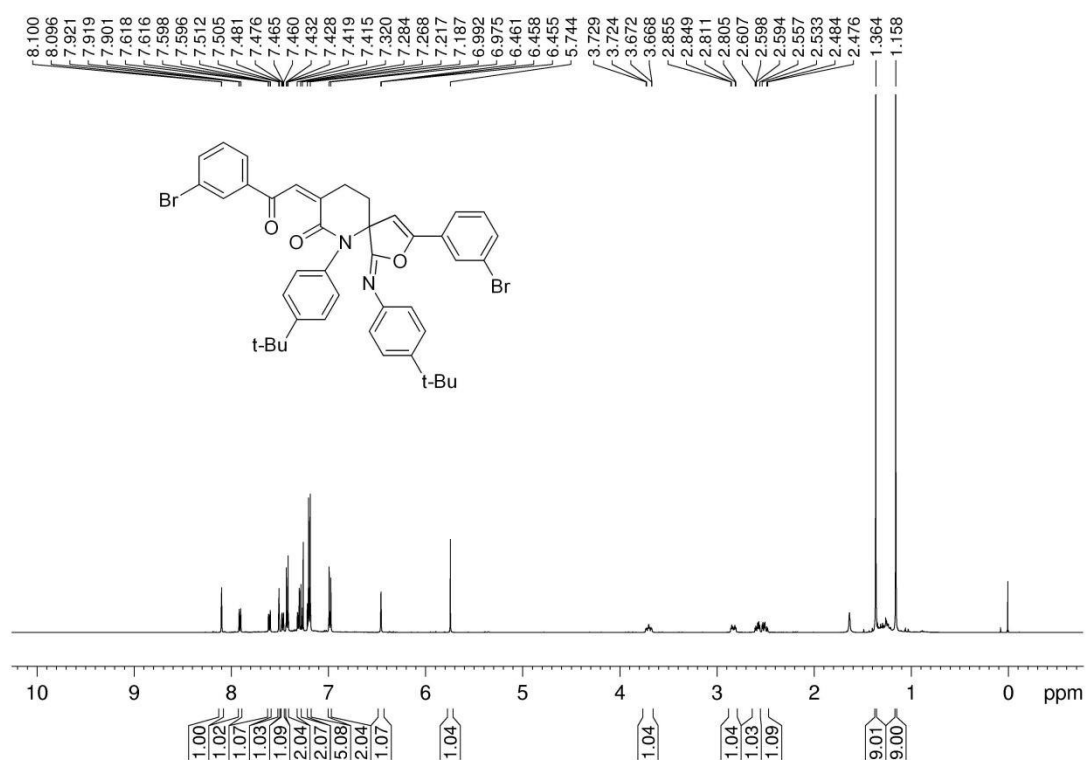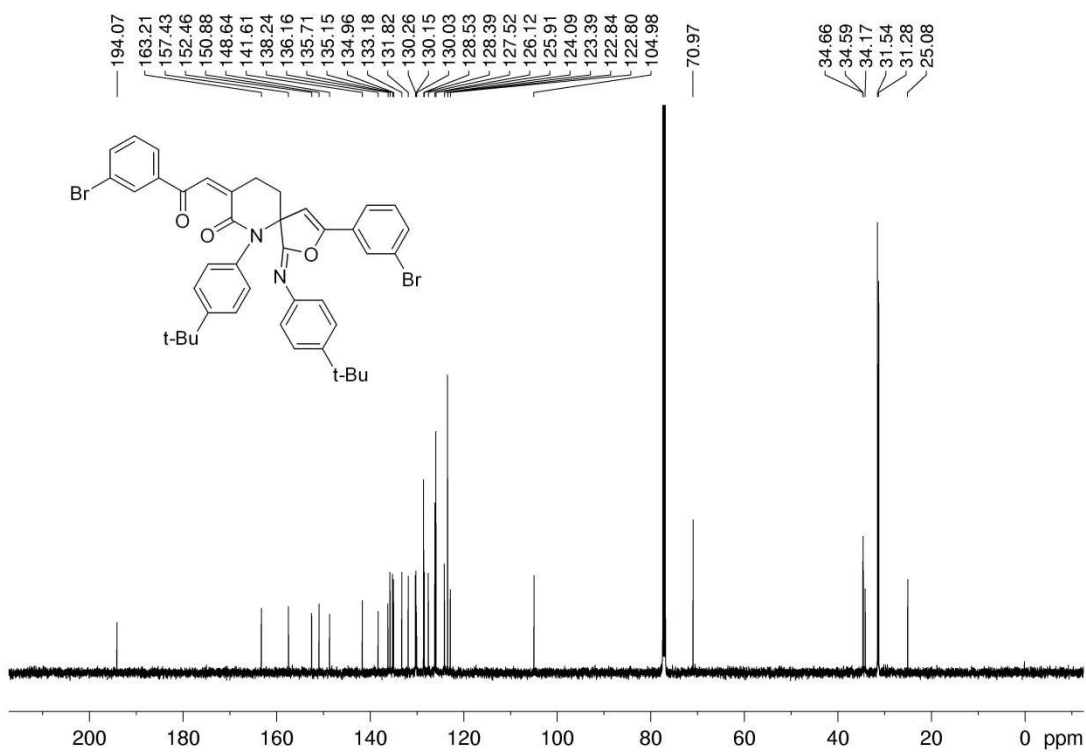

# Compound 4h

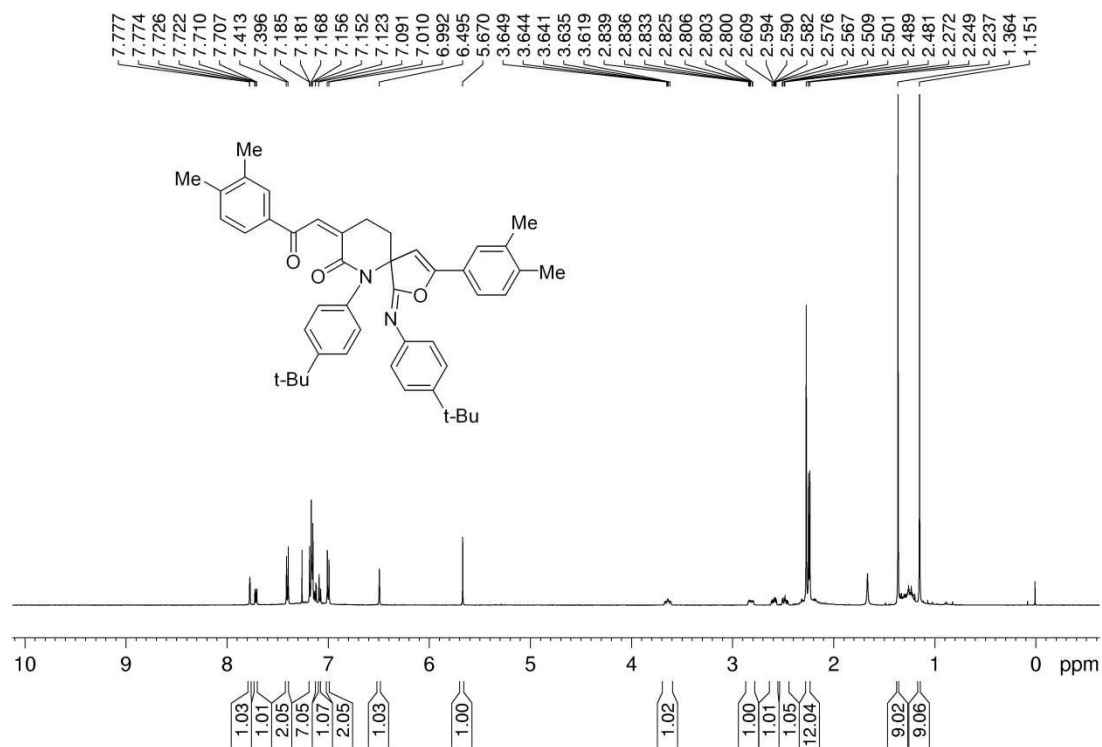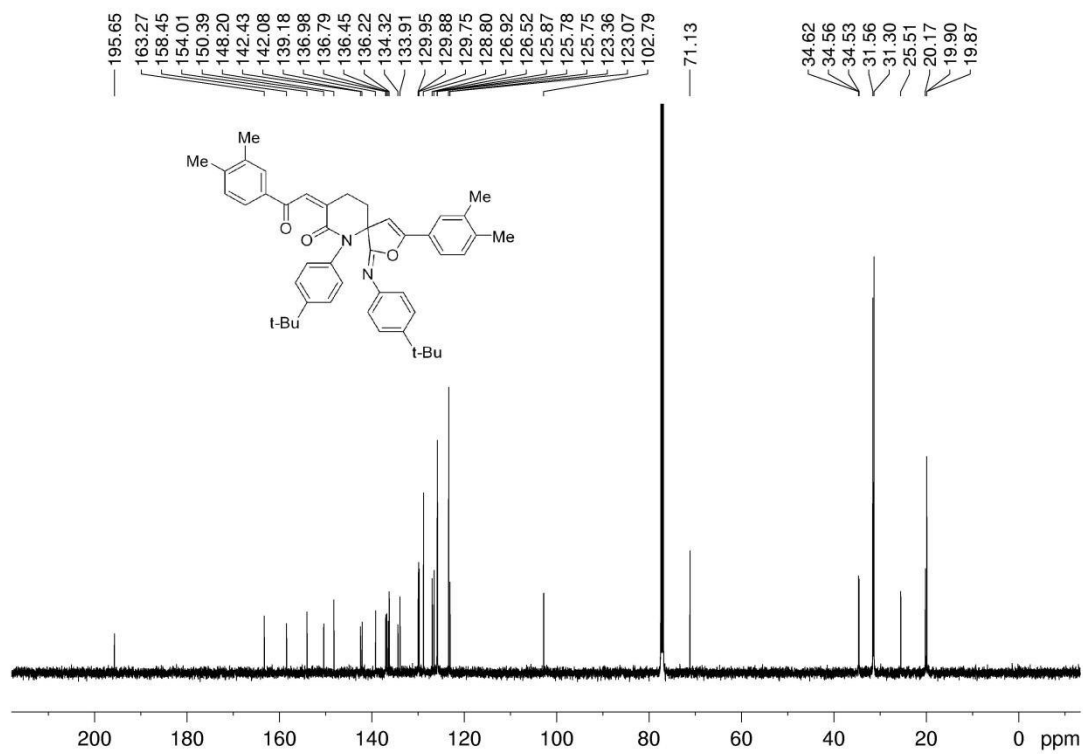

# Compound 4i

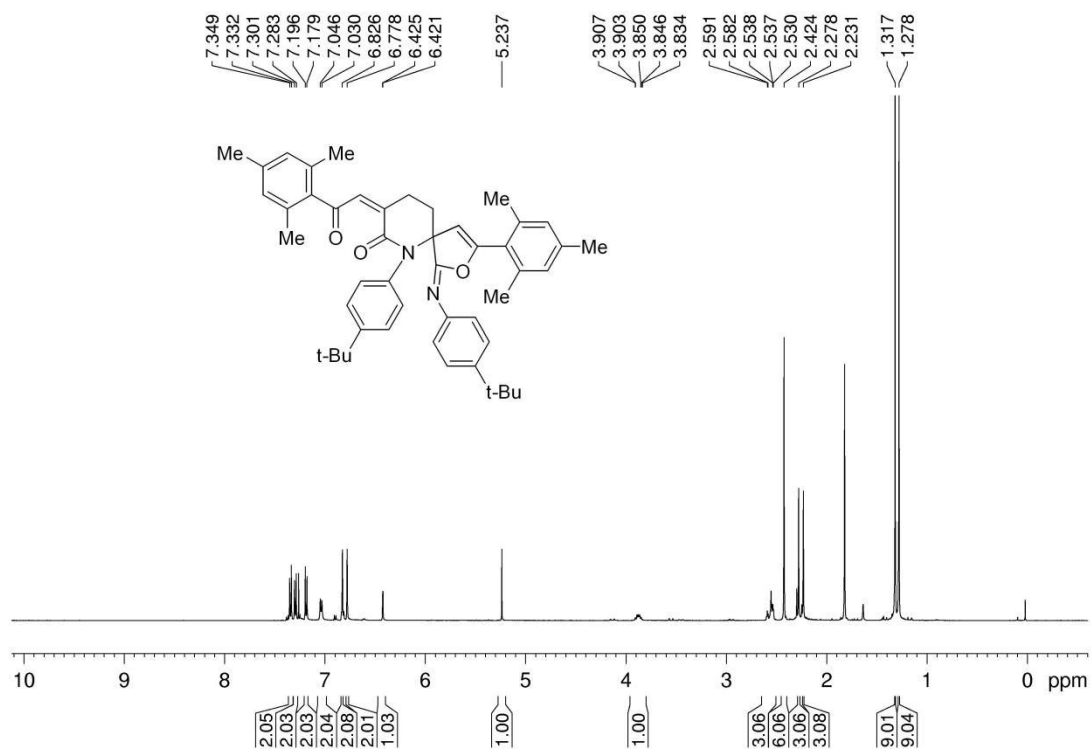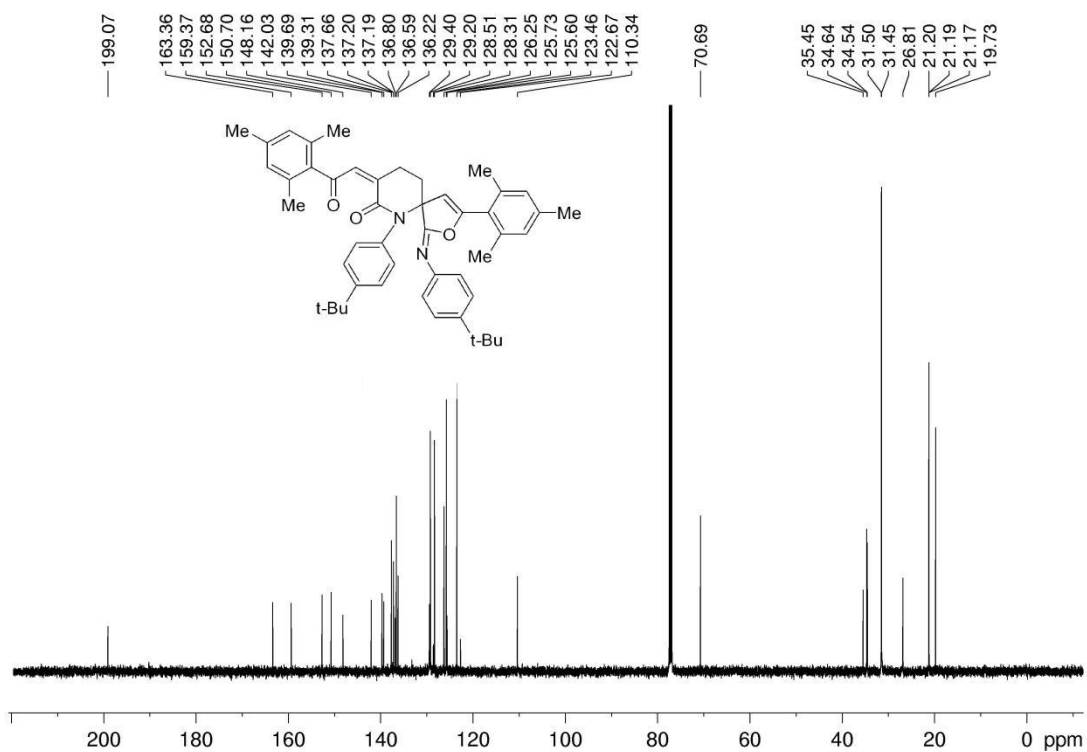

# Compound 4j

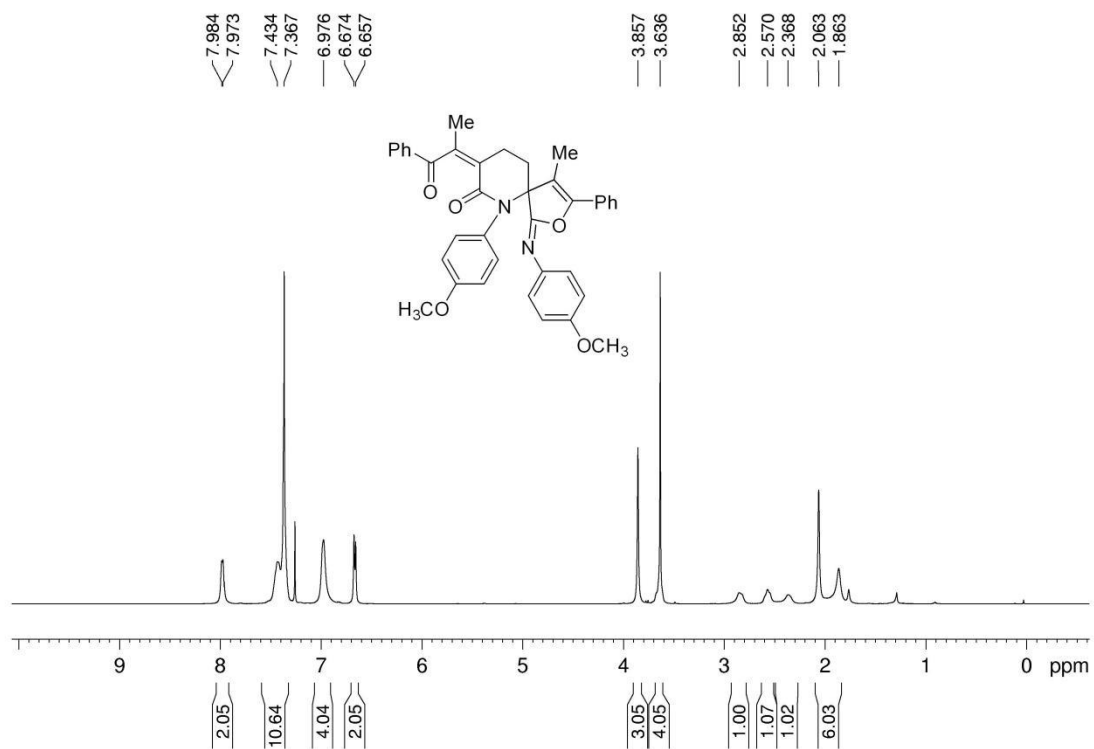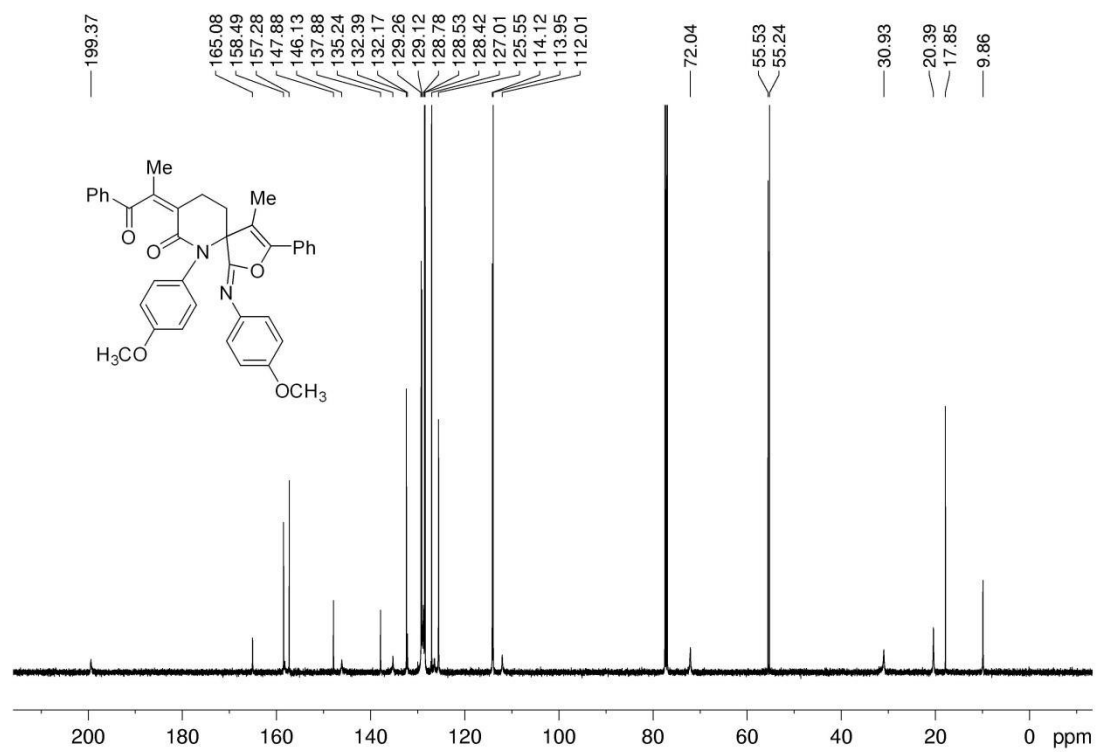

Compound **4k**

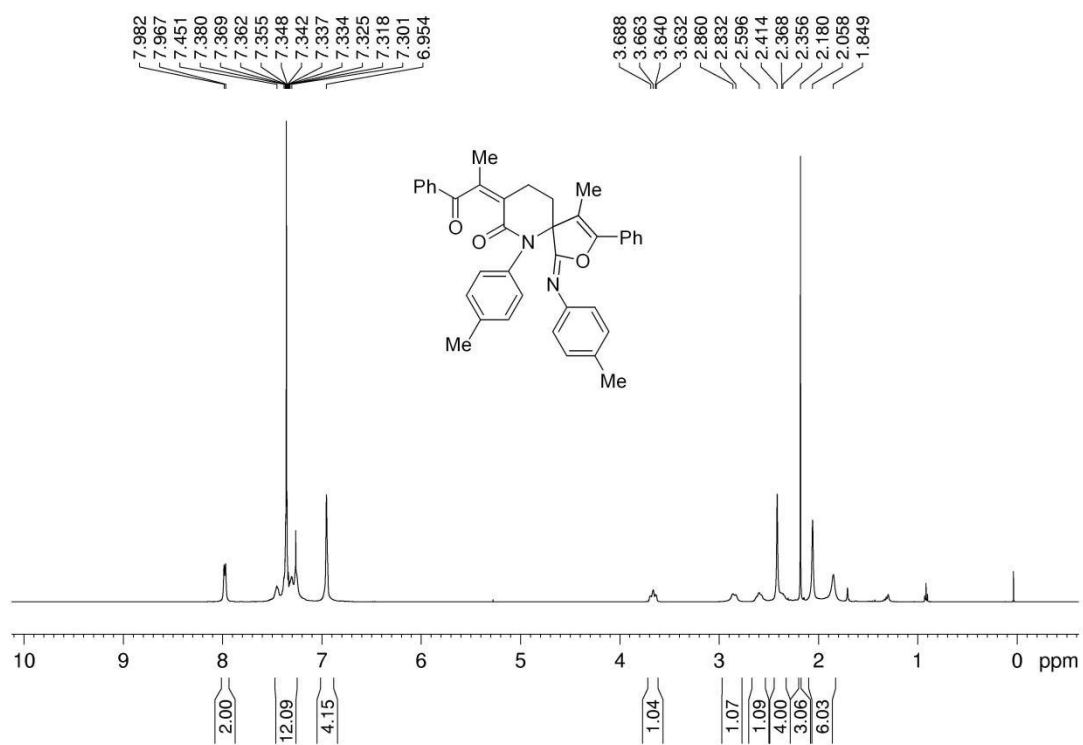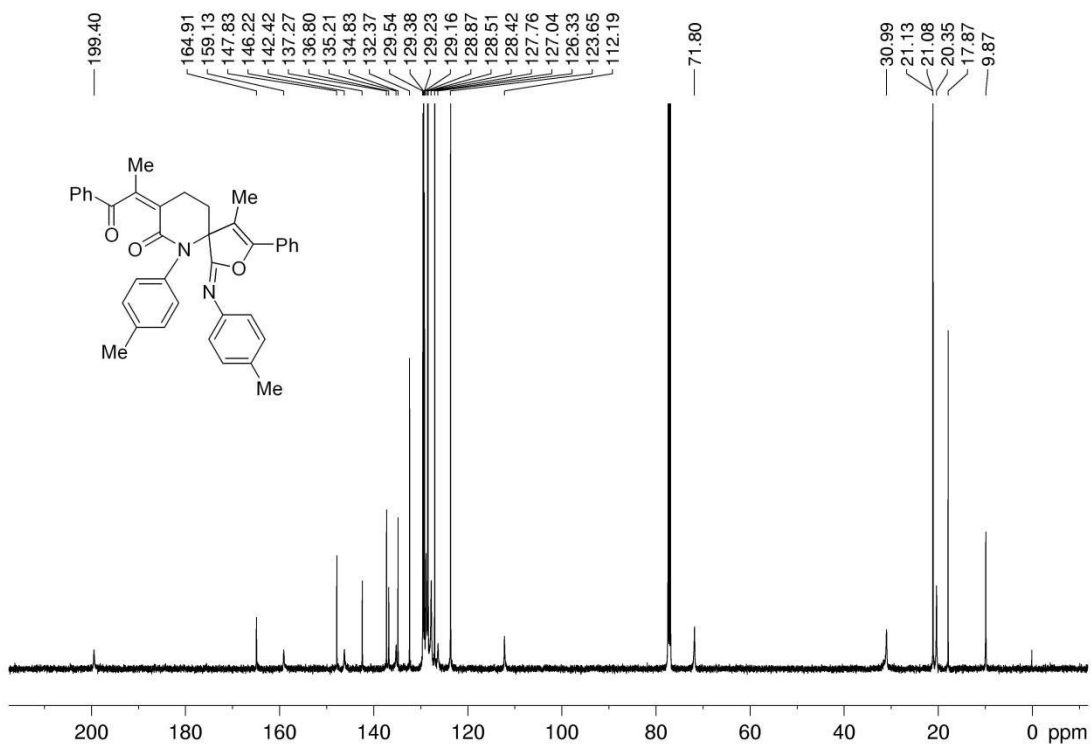

# Compound 41

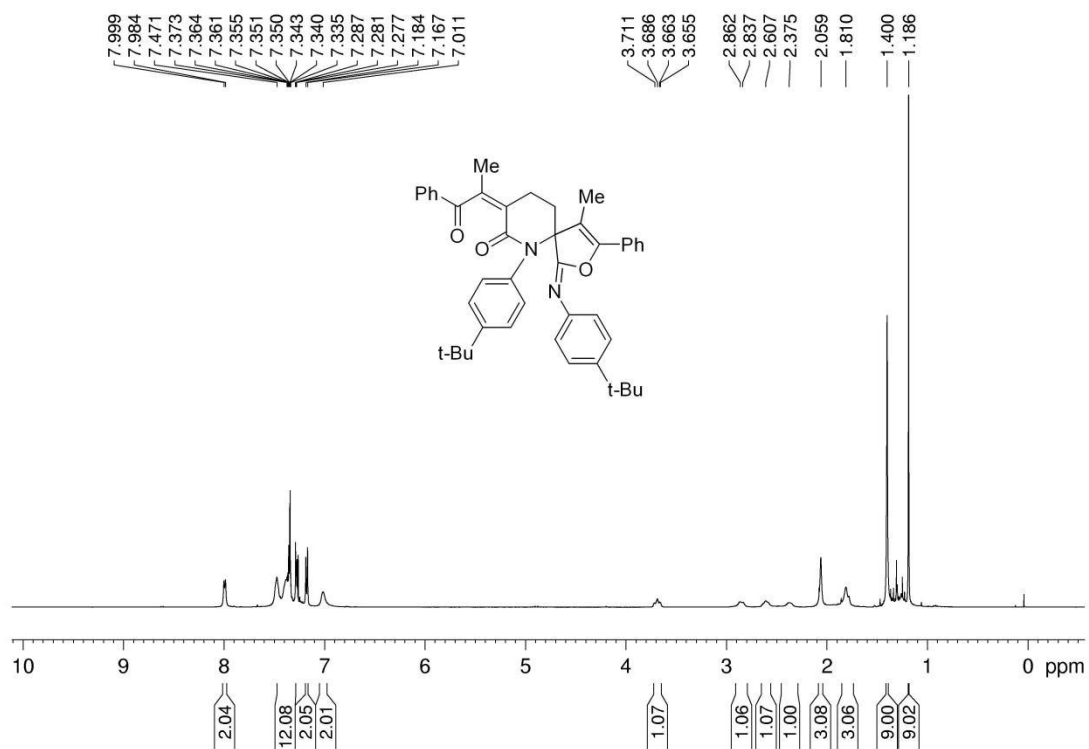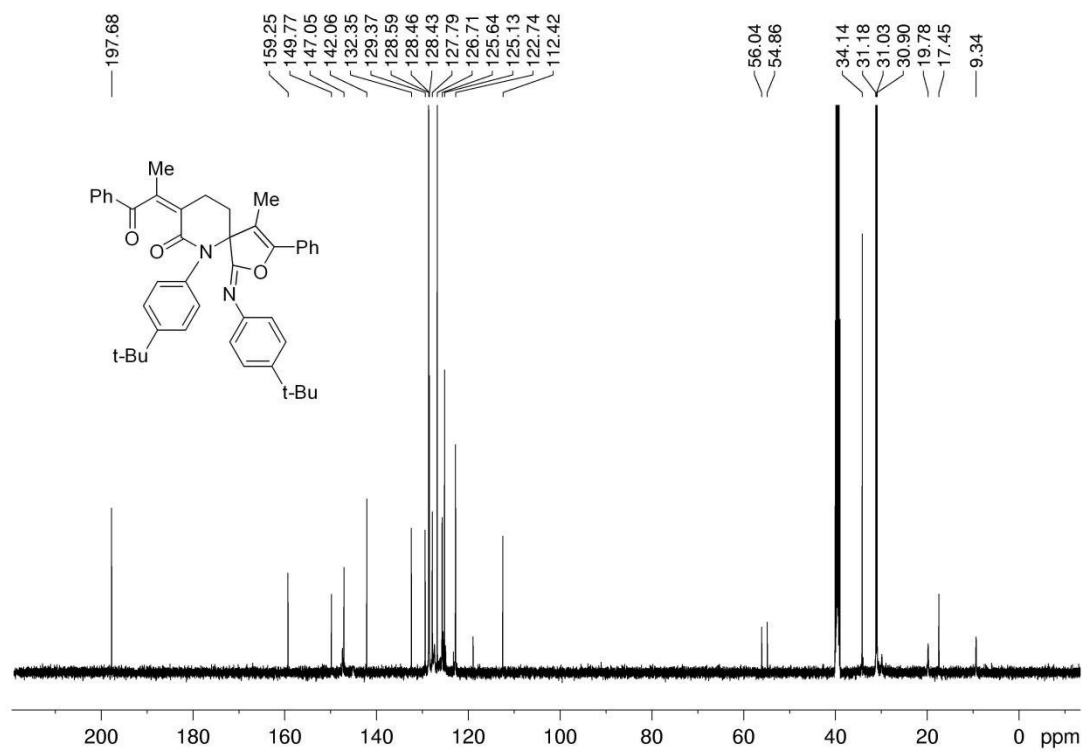



# Compound 4m

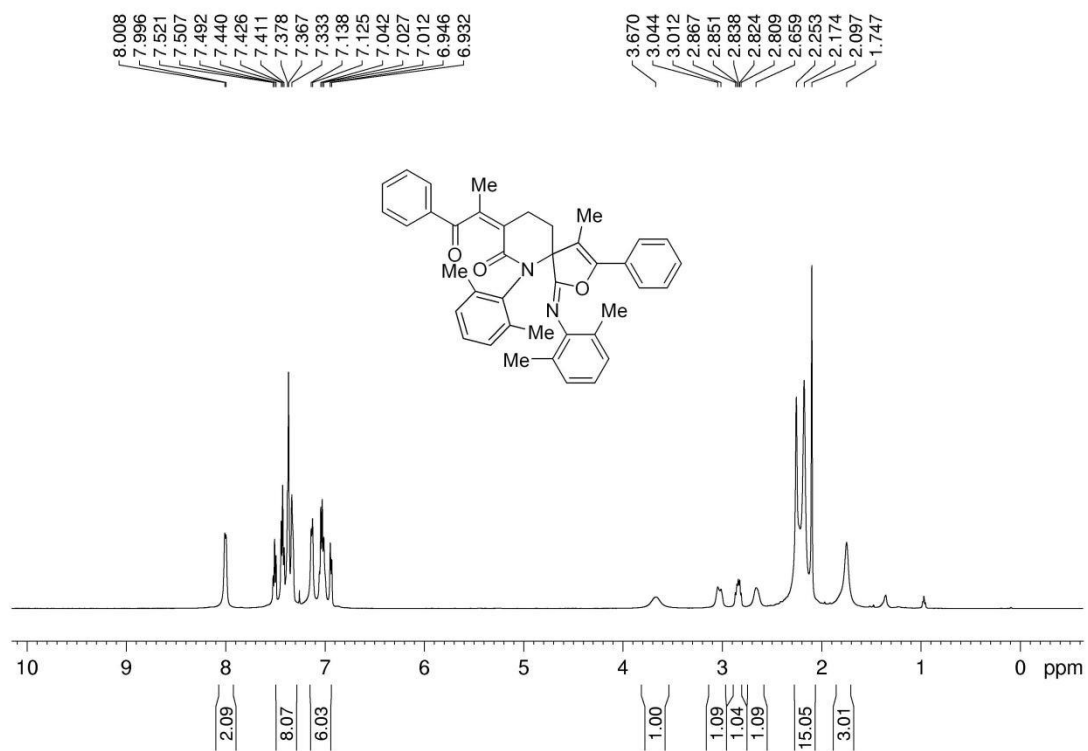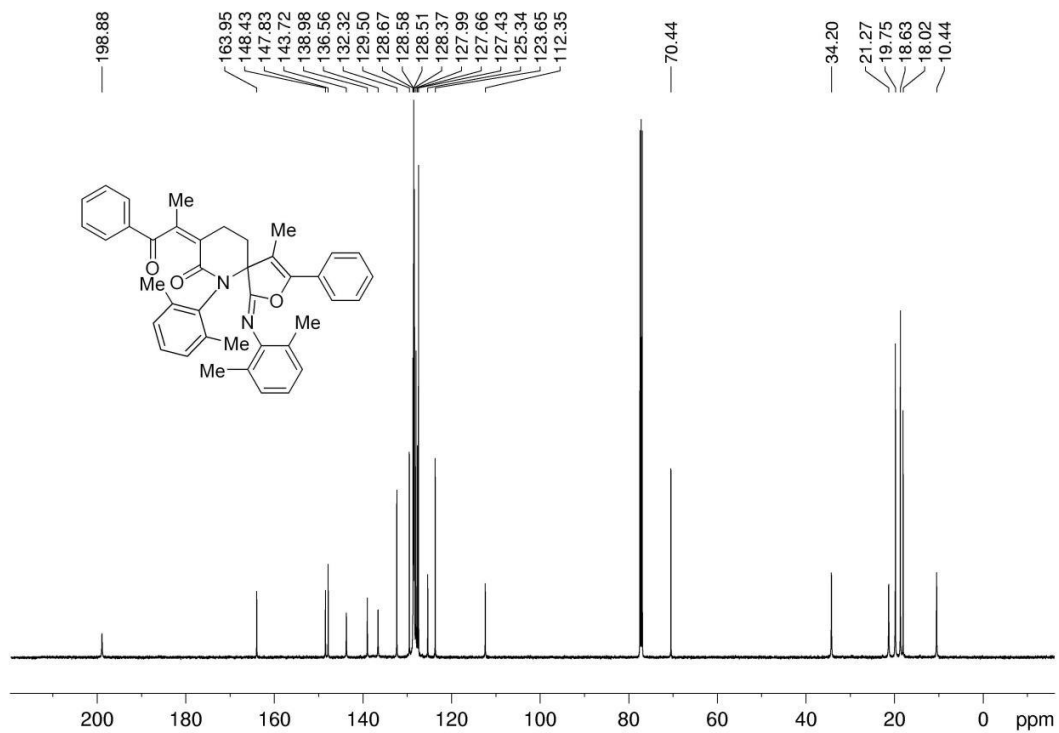

# Compound 4n

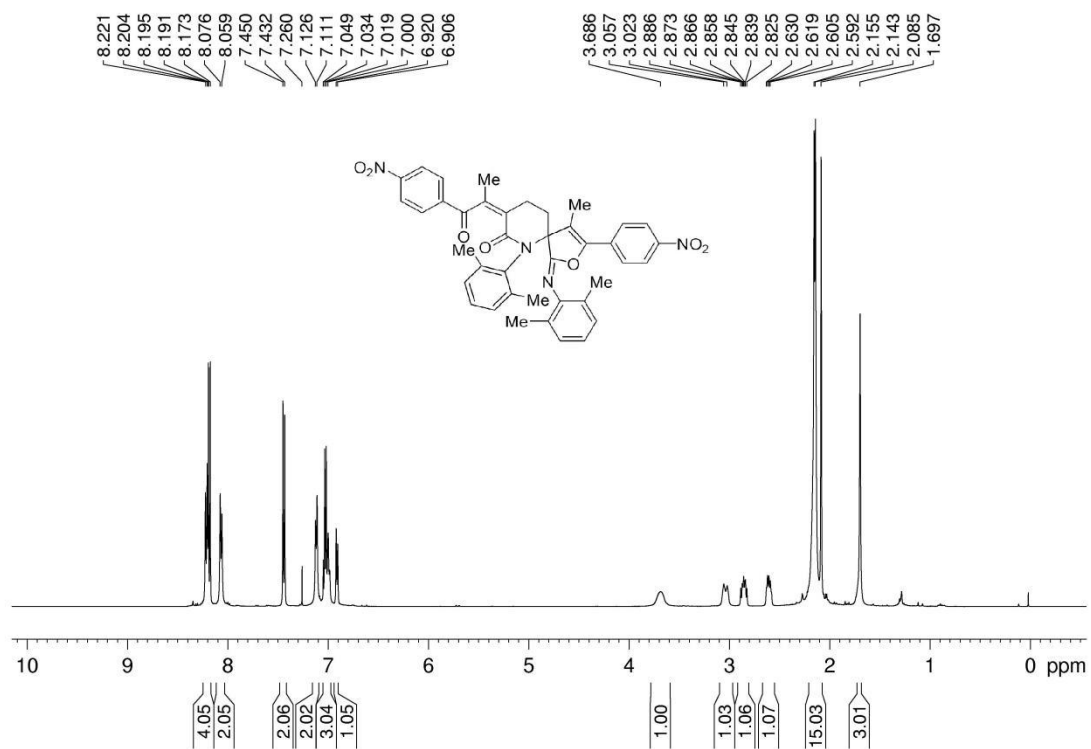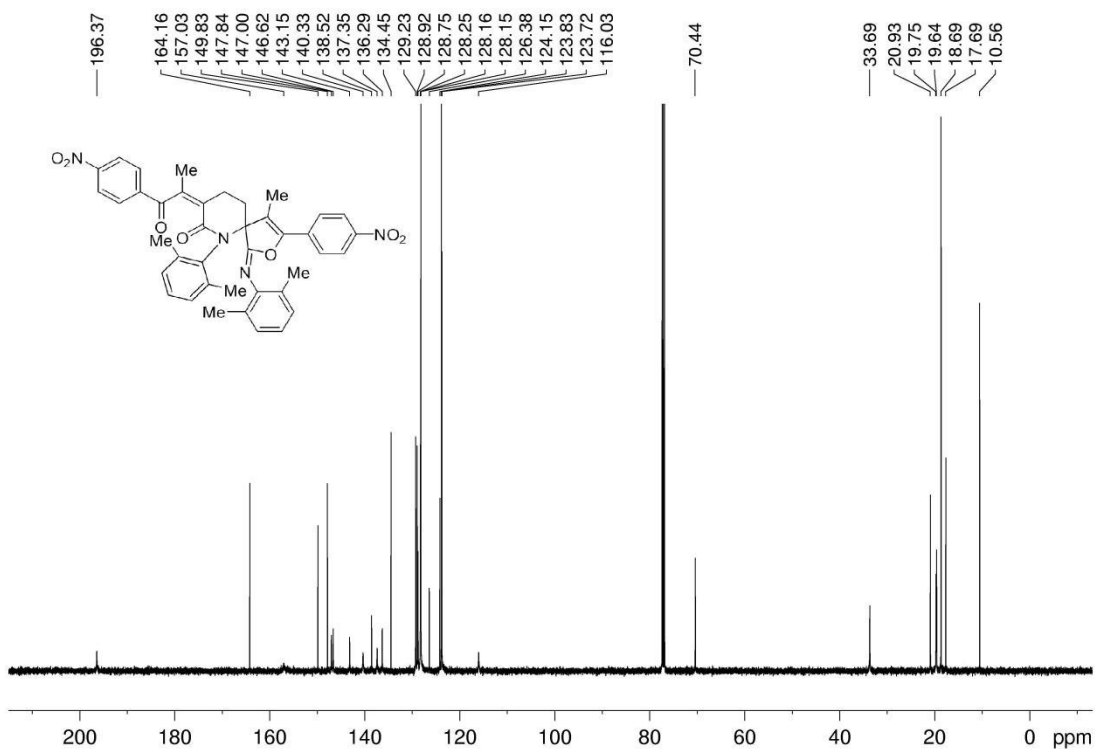

# Compound 4o

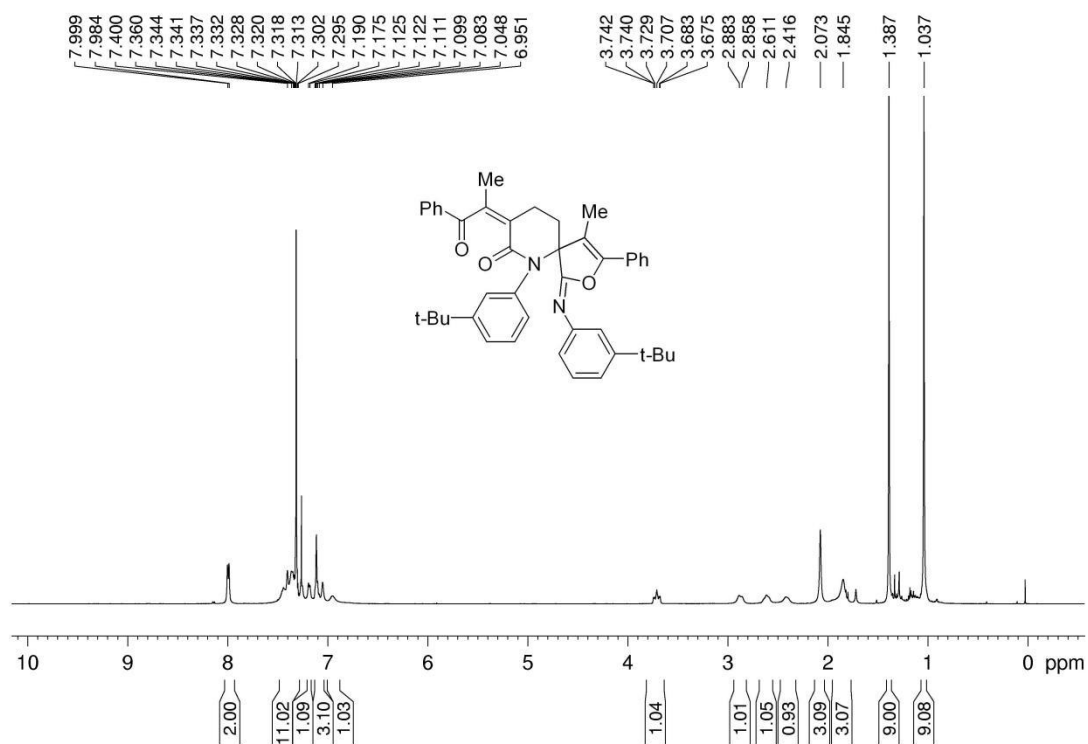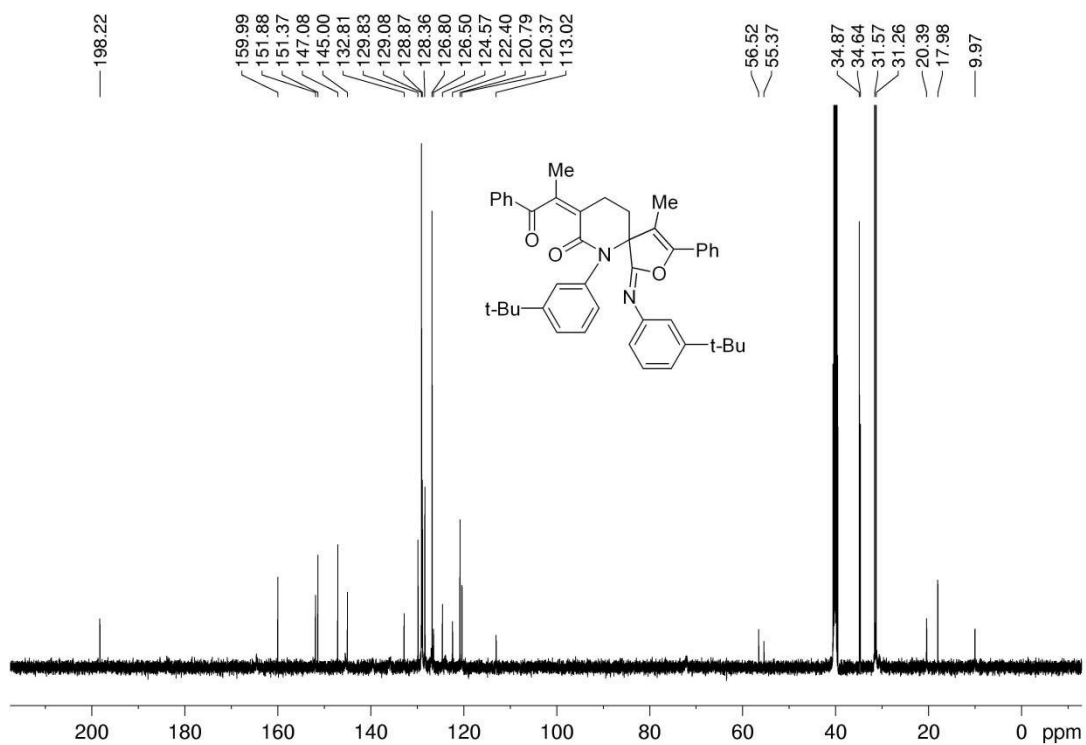

# Compound 4p

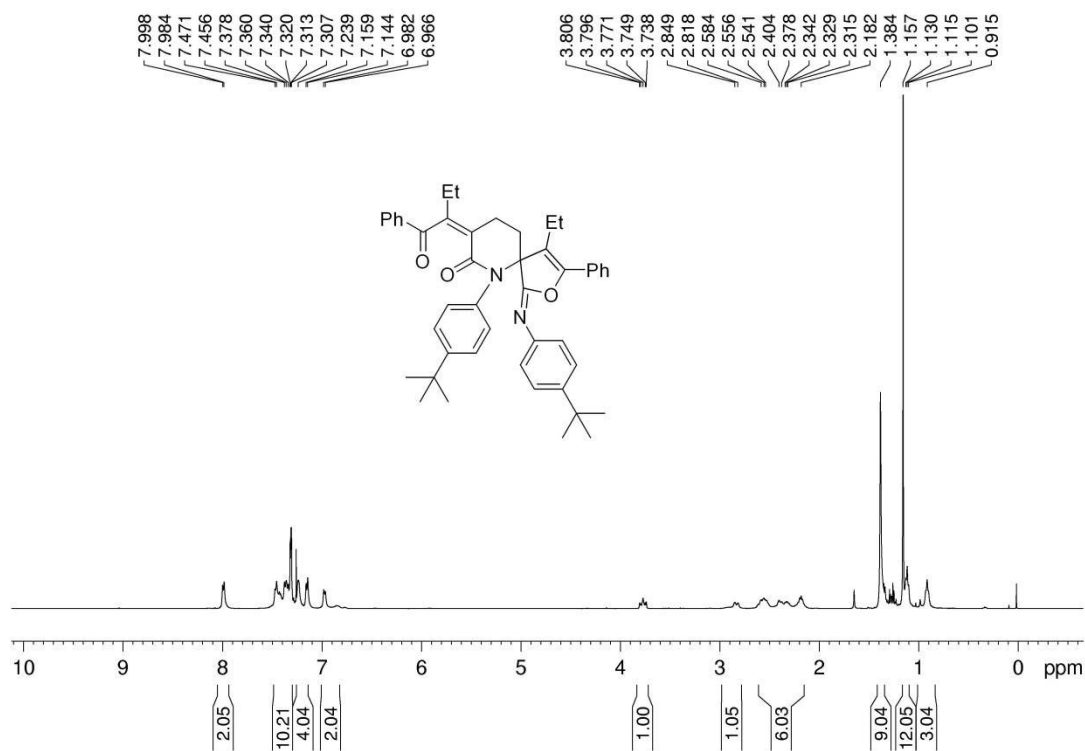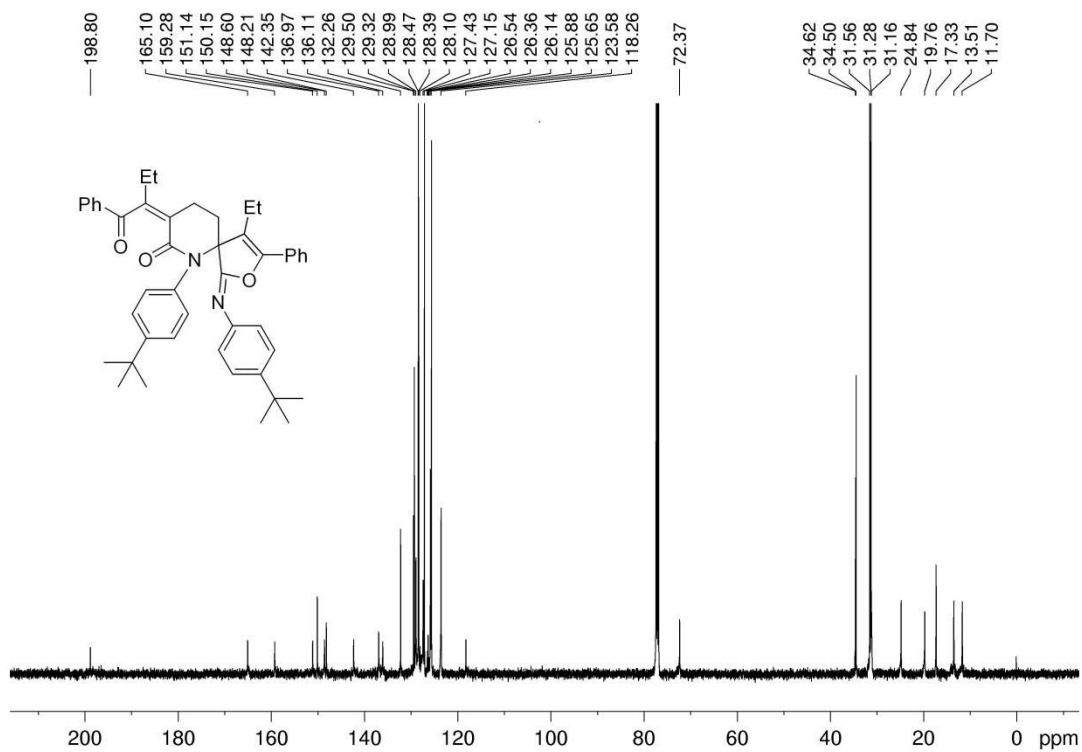

Supplement: c9cc02785h1.pdf [file c9cc02785h1.pdf]
